# Supplementary material
Source: PubMed Central journal article supplement (PMC5543416)
Supplement: NIHMS865329-supplement-Supplemental.pdf [file NIHMS865329-supplement-Supplemental.pdf]

**Supplemental Material for Manuscript:****Identification of Common Neural Circuit Disruptions in Cognitive Control Across Psychiatric Disorders**

Lisa M. McTeague, Ph.D.<sup>1</sup>, Julia Huemer, M.D.<sup>2,3,4,5</sup>, David M. Carreon, M.D.<sup>2,3,4</sup>, Ying Jiang, M.D.<sup>2,3,4</sup>, Simon B. Eickhoff, DrMed<sup>6,7,8\*</sup>, & Amit Etkin, M.D., Ph.D.<sup>2,3,4\*</sup>

## Affiliations:

<sup>1</sup> Medical University of South Carolina, Charleston, SC, USA

<sup>2</sup> Department of Psychiatry and Behavioral Sciences  
and

<sup>3</sup> Stanford Neurosciences Institute  
Stanford University, Stanford, CA USA

<sup>4</sup> Veterans Affairs Palo Alto Healthcare System, and the Sierra Pacific Mental Illness, Research, Education, and Clinical Center (MIRECC), Palo Alto, CA, USA

<sup>5</sup> Medical University of Vienna, Vienna, Austria

<sup>6</sup> Institute for Neuroscience and Medicine (INM-1); Research Center Jülich, Jülich, Germany

<sup>7</sup> Institute for Clinical Neuroscience and Medical Psychology, Heinrich-Heine University Düsseldorf, Düsseldorf, Germany

<sup>8</sup> Institute for Systems Neuroscience, School of Medicine, Heinrich-Heine University Düsseldorf, Düsseldorf, Germany

\* Denotes shared senior authorship

Corresponding author:

Amit Etkin

Stanford University

Department of Psychiatry and Behavioral Sciences

401 Quarry Road, MC: 5797

Stanford, CA 94305-5797

Email: amitetkin@stanford.edu

Phone: +1 650.725.5736

### Supplementary Materials Table of Contents

| Section | Figure/Table Title                                                                                                                                                                  | Page Number |
|---------|-------------------------------------------------------------------------------------------------------------------------------------------------------------------------------------|-------------|
| Methods |                                                                                                                                                                                     | 5           |
| Results |                                                                                                                                                                                     | 6-12        |
| Figures | SF1. A conjunction of transdiagnostic aberrant activation (i.e., pooled across patient hyper- and hypo-activation) with the multiple demand network observed by Müller et al. (25). | 13          |
|         | SF2. Correspondence of regions of transdiagnostic aberrant activation (i.e., pooled across patient hyper- and hypo-activation) and regions vulnerable to gray matter loss (9).      | 14-15       |
|         | SF3. Transdiagnostic patient hyper- and hypoactivation with the single SPECT and single ASL experiments excluded.                                                                   | 16          |
|         | SF4. Transdiagnostic patient hyper- and hypoactivation excluding the 18 diverse experiments that did not cohere into any specific domain.                                           | 17          |
|         | SF5. Transdiagnostic patient hyper- and hypoactivation separately for experiments of children, adults and older adults.                                                             | 18          |
|         | SF6. Patterns of “aberrant activation” (pooled across patient hyper- and hypoactivation) separately for childhood/adolescence and adulthood experiments.                            | 19          |
|         | SF7. Transdiagnostic patient hyper- and hypoactivation separately for experiments of medicated and unmedicated patients.                                                            | 20          |
|         | SF8. Transdiagnostic patient hyper- and hypoactivation separately for experiments of patients who performed no differently or worse than control participants.                      | 21          |
|         | SF9. Contrasts between pooled aberrant activation in psychotic and non-psychotic disorder experiments.                                                                              | 22          |
|         | SF10. Contrasts between hypoactivation in psychotic and non-psychotic disorder experiments.                                                                                         | 23          |
|         | SF11. Transdiagnostic patient hyper- and hypoactivation separately by disorder class.                                                                                               | 24          |
|         | SF12. Transdiagnostic patient hyper- and hypoactivation separately for domains.                                                                                                     | 25          |
|         | SF13. Transdiagnostic patient hyper- and hypoactivation separately by disorder class and domain.                                                                                    | 26          |
| Tables  | ST1. Experiments included in meta-analysis by diagnostic grouping, modality, domain and task.                                                                                       | 27-55       |
|         | ST2. Proportion of studies within each diagnostic group corresponding to each task domain                                                                                           | 56          |

| Section | Figure/Table Title                                                                                                                                                                                                                      | Page Number |
|---------|-----------------------------------------------------------------------------------------------------------------------------------------------------------------------------------------------------------------------------------------|-------------|
| Tables  |                                                                                                                                                                                                                                         |             |
|         | ST3. Peak coordinates of clusters for transdiagnostic pooled patient hyper- and hypoactivation (i.e., aberrant activation).                                                                                                             | 57          |
|         | ST4. Percent contribution to clusters of convergence pooled aberrant activation meta-analytic contrasts by experiment sample and design characteristics.                                                                                | 58-59       |
|         | ST5. Coordinates of clusters from a conjunction of the transdiagnostic pooled patient hyper- and hypoactivation (i.e., aberrant activation) and the multiple demand network identified from meta-analyses of healthy participants (25). | 60          |
|         | ST6. Supplementary Table 6. Peak coordinates of clusters for transdiagnostic patient hyper- and hypoactivation                                                                                                                          | 61          |
|         | ST7. Peak coordinates of clusters for transdiagnostic patient hyper- and hypoactivation excluding the experiments of arterial spin labeling and single-photon emission computerized tomography                                          | 62          |
|         | ST8. Peak coordinates of clusters for transdiagnostic patient hyper- and hypoactivation excluding tasks that did not cohere in a domain                                                                                                 | 63          |
|         | ST9. Peak coordinates of clusters from transdiagnostic patient hyper- and hypoactivation excluding studies of children and older adults.                                                                                                | 64          |
|         | ST10. Percent contribution to clusters of convergence for patient hypo- and hyper-activation contrasts by experiment sample and design characteristics.                                                                                 | 65-67       |
|         | ST11. Peak coordinates of clusters for transdiagnostic pooled patient hyper- and hypoactivation (i.e., aberrant activation) separately for studies of children and adults.                                                              | 68          |
|         | ST12. Peak coordinates of clusters for transdiagnostic patient hyper- and hypoactivation separately for medicated and unmedicated patients                                                                                              | 69          |
|         | ST13. Peak coordinates of clusters for transdiagnostic patient hyper- and hypoactivation separately for patient samples who performed no differently or worse than control groups.                                                      | 70          |
|         | ST14. Peak coordinates of clusters derived from pooled patient hyper- and hypoactivation (i.e., aberrant activation) separately for psychotic and non-psychotic samples.                                                                | 71          |
|         | ST15. Percent contribution to clusters of convergence non-psychotic and psychotic pooled aberrant activation contrasts by experiment sample and design characteristics.                                                                 | 72-73       |
|         | ST16. Peak coordinates of clusters from patient hypoactivation separately for psychotic and non-psychotic samples.                                                                                                                      | 74          |
|         | ST17. Percent contribution to clusters of convergence for non-psychotic and psychotic patient hypo- and hyper-activation activation contrasts by sample and design characteristics.                                                     | 75-76       |

| Section | Figure/Table Title                                                                                                | Page Number |
|---------|-------------------------------------------------------------------------------------------------------------------|-------------|
| Tables  | ST18. Peak coordinates of clusters from patient hyper- and hypoactivation separately by disorder classes          | 77          |
|         | ST19. Peak coordinates of clusters from patient hyper- and hypoactivation separately by domain                    | 78          |
|         | ST20. Peak coordinates of clusters from patient hyper- and hypoactivation separately by domain and disorder class | 79          |

## Supplementary Methods

**Peak Coordinate Extraction.** Peak coordinates and participant descriptive information were extracted from each paper separately by a minimum of two doctoral-level researchers (LM, JH, DC, AE, YJ) with expertise in psychiatric neuroimaging. In the case of discrepancies one to three additional doctoral-level coders re-entered those articles. Each discrepancy resulting from more than straightforward entry error was reviewed to establish consensus.

**Activation Likelihood Estimation (ALE) Meta-analysis.** The revised ALE algorithm, implemented in MATLAB, was used to identify areas of convergence of reported coordinates for patient/control differences in activation during cognitive control tasks higher than expected under a random spatial association (28-29). ALE models activation as 3-dimensional Gaussian probability distributions centered on the reported peak coordinate, capturing the spatial uncertainty associated with each focus. The probability distributions for all foci of a given experiment were aggregated as a “modeled activation map” (30). The union of all modeled activation maps then resulted in voxelwise ALE scores, which were tested against an analytically derived null-distribution that reflects a random spatial association between experiments with a fixed within-experiment distribution of foci (30). Hereby, random-effects inference was applied, which assesses above-chance convergence between experiments. The observed ALE scores were tested against the expectation on the ALE scores under the null distribution of random spatial association across experiments. The resulting nonparametric p values were then thresholded at a cluster-level familywise-error-corrected threshold of  $p < .05$  (cluster-forming threshold at voxel-level  $P < .005$ ) and transformed into z scores for

display. To avoid results dominated by one or two individual experiments and to have sufficient power to detect moderately sized effects, ALE analyses were limited to those contrasts with at least 20 experiments (31).

### **Supplementary Results**

**Final Selected Experiment Set.** The final set of experiments submitted to meta-analysis consisted of 283 experiments from 251 articles (Figure 1; Table S1) for a total of 11,299 participants (5,492 patient and 5,751 control participants). The vast majority of experiments (n=260) utilized functional magnetic resonance imaging (fMRI) followed by 21 positron emission tomography experiments and one each using arterial spin labeling and single-photon emission computerized tomography. See Figure S3 for analyses limited to fMRI and PET. Experiments were published between 1996 and May 2015 with less than 5% published in the first five years, 23% in the next five years, 40% in the subsequent five years and finally 32% between 2011 and spring 2015.

For the small subset of articles that included multiple patient groups completing the same experimental paradigm (seven papers included more than one patient group) each patient versus control comparison was included as a separate experiment. Articles with results of multiple tasks probing cognitive control in the same participants were included as separate experiments in the meta-analysis (i.e., eight articles included two tasks; four articles included three tasks).

Experiments were selected to capture lifespan patterns and thus included participants ranging from childhood (youngest experiment group mean age=11.2 years) through older adulthood (oldest experiment group mean age=73.3 years). The majority of experiments represented adulthood (n=248; 18-50 years; participant mean

age=34.12 years), followed by childhood/adolescence (n=27; <18 years; mean age=15.41 years) and very few with older adults (n=8; >50 years; mean age=58.03 years). See Figure S5 for analyses limited to adults and SF6 for adults and children/adolescents separately. Furthermore, most experiments included medicated (n=193) versus unmedicated (n=60) patients while the information was lacking for 30 experiments. See Figure S7 for analyses by current medication status. Poorer behavioral performance on the scanner task by patients relative to control participants was reported in 135 experiments, no differences in 146 experiments, and not reported or assessed for 2 experiments. See Figure S8 for analyses by performance status. Baseline experiments of interventional studies (e.g., drug administration, treatment) otherwise meeting criteria were included.

The psychotic disorders category comprised 139 experiments almost exclusively of schizophrenia (n=135) in addition to mixed schizophrenia/schizoaffective (n=2), schizoaffective (n=1) and delusional disorders (n=1). The more heterogeneous non-psychotic disorders category comprised 144 experiments of unipolar depressive disorders (major depression n=24; dysthymia n=2; mixed depression/dysthymia n=1), anxiety disorders (obsessive compulsive disorder (OCD) n=25; posttraumatic stress disorder (PTSD) n=6; social anxiety disorder n=1); bipolar disorders n=49; and substance use disorders (mixed substance abuse and/or dependence disorders n=35: stimulant n=11; alcohol n=9; cannabis n=6; polysubstance n=4; opiate n=3; cocaine n=2). Across disorders, patient participants included those with first episode and chronic disorder manifestations, as well as interepisode expressions in the case of chronic bipolar and psychotic disorders (8/139 and 24/50 psychotic and bipolar disorder

experiments respectively included interepisode patient samples). Reports of comorbidity were inconsistent across studies precluding quantification. Exclusion criteria also provided incomplete information about comorbidity as exclusion was often limited to substance abuse (in the case of non-substance use disorder studies) or psychotic symptoms or disorders (in the case of non-psychotic disorder studies) with no information pertaining to other disorders. In summary, the meta-analysis included a highly diverse sample of diagnostic presentations from across the major categories of Axis I psychopathology.

In the following paragraphs, we report on a series of chi-square tests of the distributions of experiments by 1) task domain (across diagnosis), 2) diagnostic grouping (across domain), and 3) task domain by diagnostic grouping.

In addition to the diversity in diagnoses, included experiments represented an array of cognitive control tasks corresponding to an array of performance domains (cf. Table S1). The representation of experiments (across diagnoses) varied by domain,  $\chi^2(8) = 200.3, p < .001$ . This was due to greater representation of experiments of working memory ( $n=100$ ), response inhibition ( $n=42$ ), recognition memory ( $n=37$ ), and conflict monitoring ( $n=31$ ), relative to experiments of verbal fluency ( $n=17$ ), set shifting ( $n=15$ ), response selection ( $n=12$ ), performance monitoring ( $n=11$ ) and a ninth set of 18 diverse experiments that did not cohere into any of these specific domains. Notably, the predominance of working memory experiments in relation to other domains (38%) is striking and could suggest a bias among investigators to hypothesize its critical role in psychiatric dysfunction. However, whole-brain meta-analyses of cognitive control in healthy samples have revealed a similar over-representation of working memory



experiments (26) suggesting broader supposition in cognitive neuroscience of its foundational role in adaptive as well as maladaptive cognitive function. While these findings suggest that a broader sampling of tasks is warranted in future psychiatric neuroimaging studies, the parallel distribution of tasks in the current meta-analysis of patients to meta-analysis of healthy samples, underscores the relevance of these findings to the broader literature on intact cognitive functioning.

Experiments investigating psychotic (n=139) and non-psychotic disorder samples (n=144) were equally represented across domains,  $X^2(2)= 0.09$ , ns. However, the distribution of experiments (across domains) varied dramatically by more refined diagnostic category,  $X^2(4)= 155.15$ ,  $p<.001$ . This was largely due to schizophrenia spectrum disorders (51%) far exceeding all other groups in representation, pairwise  $X^2$  comparisons of schizophrenia to each group,  $ps<.05$ . Unfortunately, it was not possible to determine the sample correspondence between this dataset and that of found by Goodkind and colleagues (9) in their sample of whole brain VBM experiments, given the lack of indications to that end in the papers. Nevertheless, the breakdown by diagnosis is very similar,  $X^2(4)= 5.89$ , ns. The relative proportion of the respective samples is as follows (% of cognitive control experiments; % of VBM experiments): psychotic disorders (51%; 43%), bipolar disorders (18%; 14%), anxiety disorders (11%; 23%), depressive disorders (10%; 13%), substance use disorders (12%; 10%). While not an exhaustive representation of the extant literature, these findings do suggest that additional structural neuroimaging as well as functional neuroimaging of cognitive task activation is warranted in non-psychotic disorders.

Finally, the distribution of tasks across the nine task domains varied by diagnosis,  $\chi^2(32) = 78.25$ ,  $p < .001$ , due to the greater representation of schizophrenia spectrum samples relative to each of the other disorders specific to experiments of performance monitoring, verbal fluency, recognition, and working memory,  $ps < .05$ . The non-psychotic disorder groups showed no differences in distributions of experiments by domain, with the exception of verbal fluency, which had a higher proportion of bipolar disorder experiments than the other non-psychotic disorders. The wide distribution across cognitive domains by disorder is evident in Table S2, which shows the proportion of experiments within each diagnostic group corresponding to each task domain.

While the meta-analytic approach may impose limitations by the breadth of published literature, it also productively highlights a number of implied conceptual and methodological biases in psychiatric and cognitive neuroscience research. This was especially pronounced in examining lifespan effects. In the case of older adults, even with the very lenient threshold of categorizing all participants over 50 years as elderly, we could only identify eight eligible experiments, i.e., less than 3% of the included set. With a global average life expectancy of 71 years and 79 years in the United States (WHO; [http://www.who.int/gho/mortality\\_burden\\_disease/life\\_tables/en/](http://www.who.int/gho/mortality_burden_disease/life_tables/en/)), there is a dearth of neuroimaging data to guide understanding of cognitive control and psychopathology in aging samples. In the case of children and young adults less than 18 years, we identified 27 eligible experiments, less than 10% of the experiment set. In turn, 53% of the total experiments were samples with mean ages between 30 and 40 years. Relatedly, schizophrenia spectrum disorders far exceeded other disorder classes. Anxiety and to some extent unipolar depression have shown more modest

neuropsychological deficits than other disorders while more significant deficits have characterized bipolar and substance use disorders, yet the parallel functional imaging corpus is nonetheless limited. Finally, working memory was by far the best-represented task domain, a bias also represented in work with healthy samples (26).

**Voxelwise Analyses by Cognitive Domain and Disorder Class.** The primary questions of interest were focused on multiple demand or general cognitive processing, and naturally, performance of most tasks involves a synergy of cognitive processes that spans domains. Nonetheless, to assess the contribution of different domains to the overall convergence, domain-specific analyses were performed for domains with contrasts from more than 20 experiments and thus adequate power to detect convergence (i.e., working memory (n=100), response inhibition (n=42), recognition memory (n=37), conflict monitoring (n=31). Patient hypoactivation was observed during working memory in right anterior insula/ventrolateral prefrontal cortex and vermis of the cerebellum, and during response inhibition in the right anterior insula/ventrolateral prefrontal cortex and right claustrum, Patient hyperactivation was evident during working memory in ventromedial prefrontal cortex. Other domains did not show significant regions of hyper- or hypoactivation (Figure S12). Overall, these data suggest that the broad array of cognitive demands evoked by a heterogeneous array of tasks contributed to the transdiagnostic convergence evident in the multiple demand network abnormalities observed here. Again, ALE analyses were also run for each disorder by domain for the two contrasts with more than 20 experiments and thus adequate power to detect convergence (i.e., working memory experiments on schizophrenia (n=54) and recognition memory experiments on schizophrenia (n=27)). Schizophrenia spectrum

disorders showed patient hypoactivation in right insula/ventrolateral prefrontal cortex during working memory (Figure S13) and no whole-brain activations converged for recognition memory tasks. All other comparisons included only one to 16 experiments.

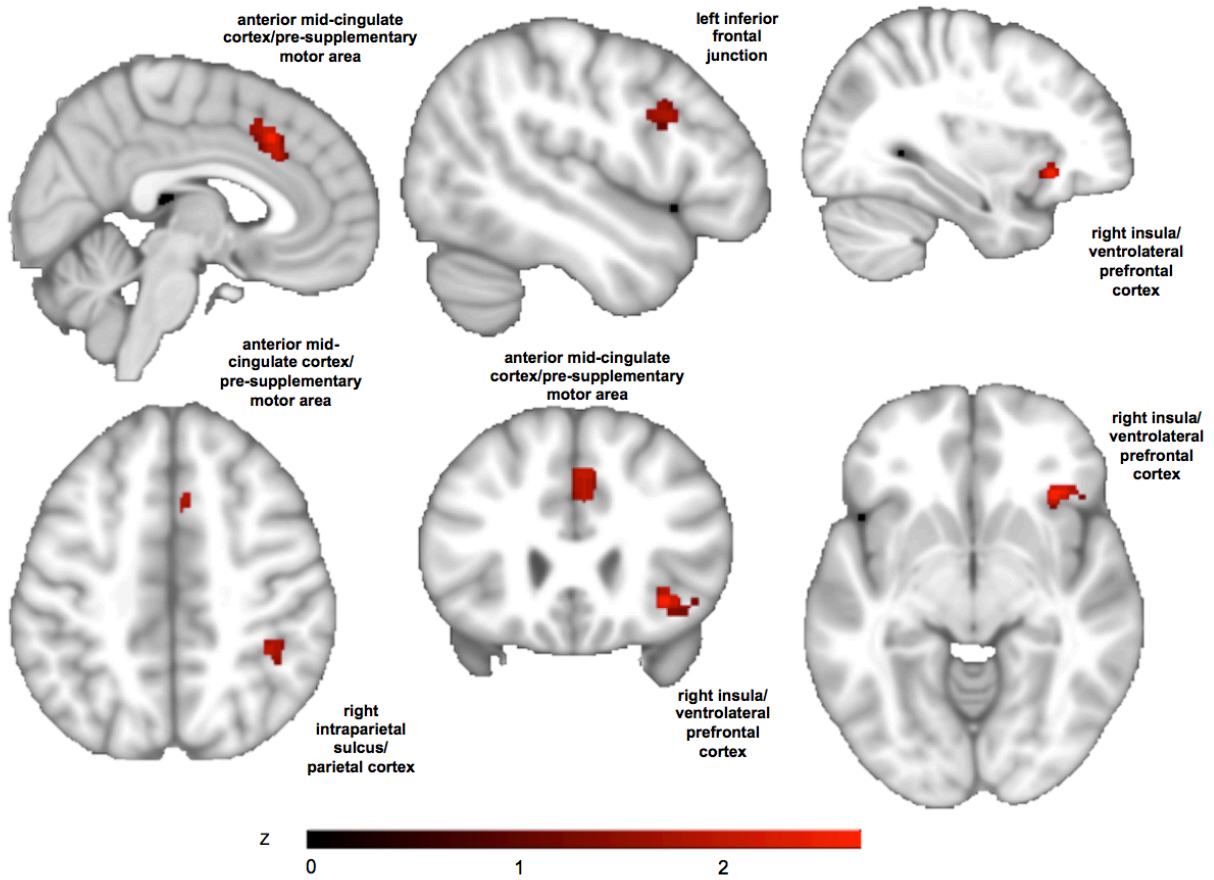

Supplementary Figure 1. A conjunction with the multiple demand network observed by Müller et al. (25), highlighting the overlap with multiple nodes in the distributed network of regions showing transdiagnostic aberrant activation (i.e., pooled across patient hyper- and hypo-activation (red)) during cognitive processing.

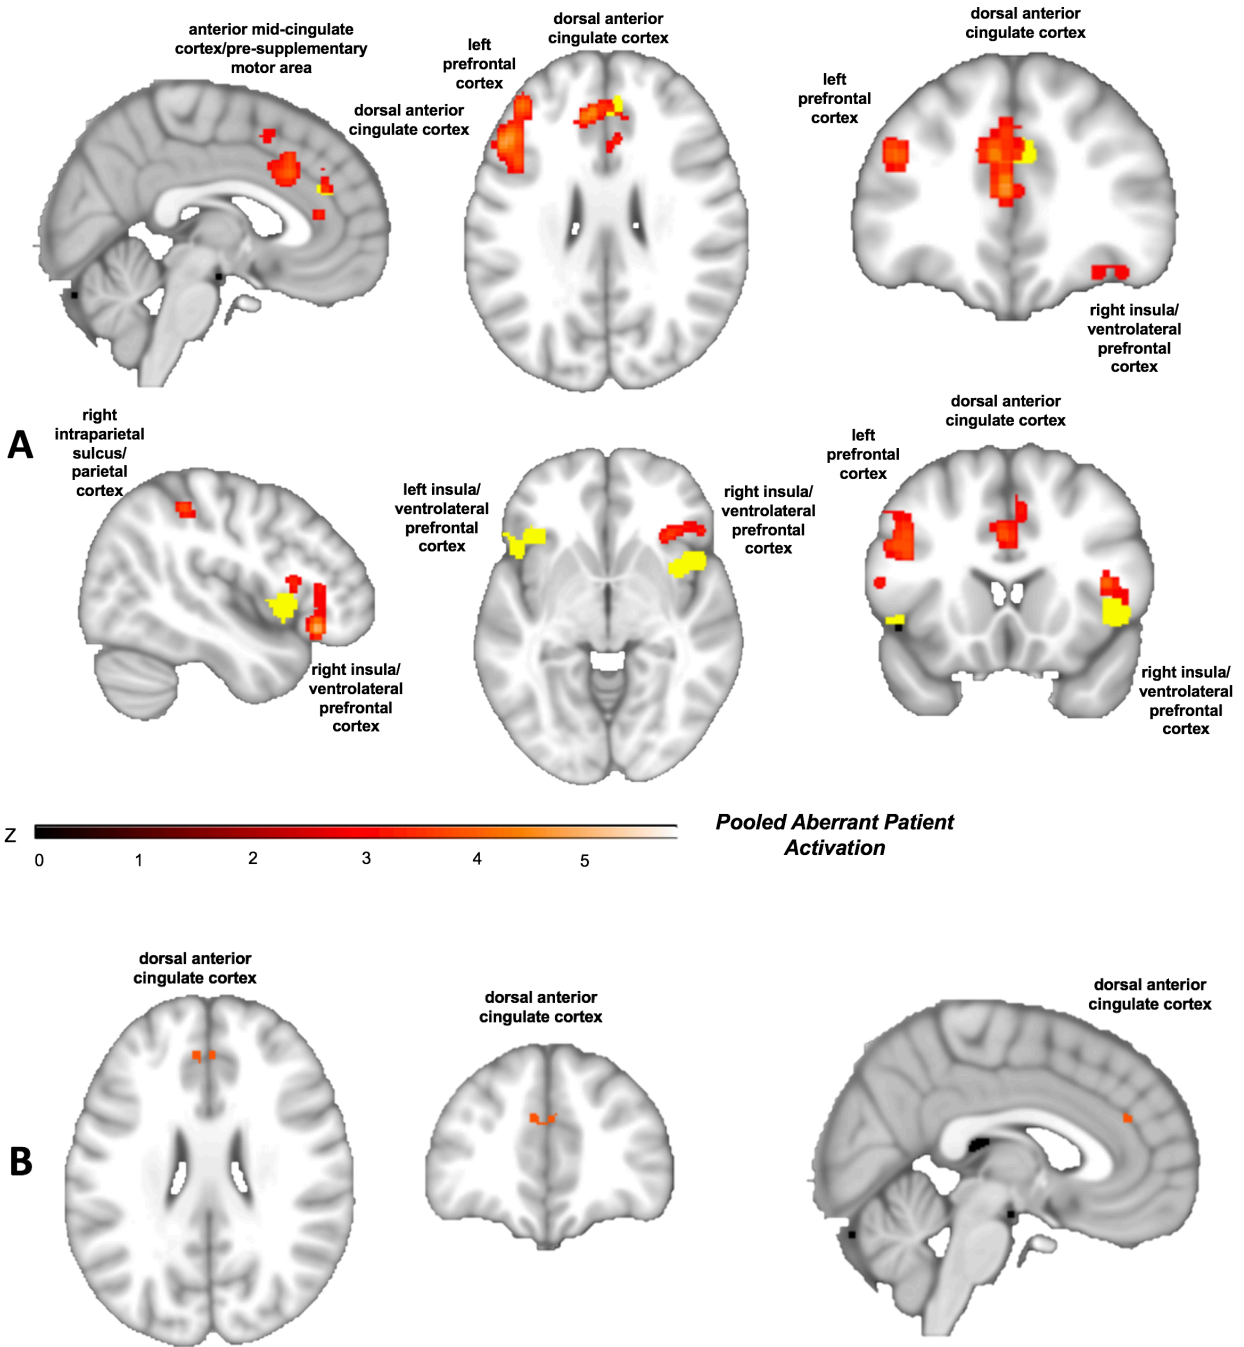

Supplementary Figure 2. A) Regions of transdiagnostic aberrant activation (i.e., pooled across patient hyper- and hypo-activation (red), showing nodes very near and partially overlapping with the dorsal anterior cingulate and anterior insula regions of gray matter

loss (yellow) observed by Goodkind and colleagues (9). B) A conjunction highlights anatomical and functional correspondence in dorsal anterior cingulate (orange).

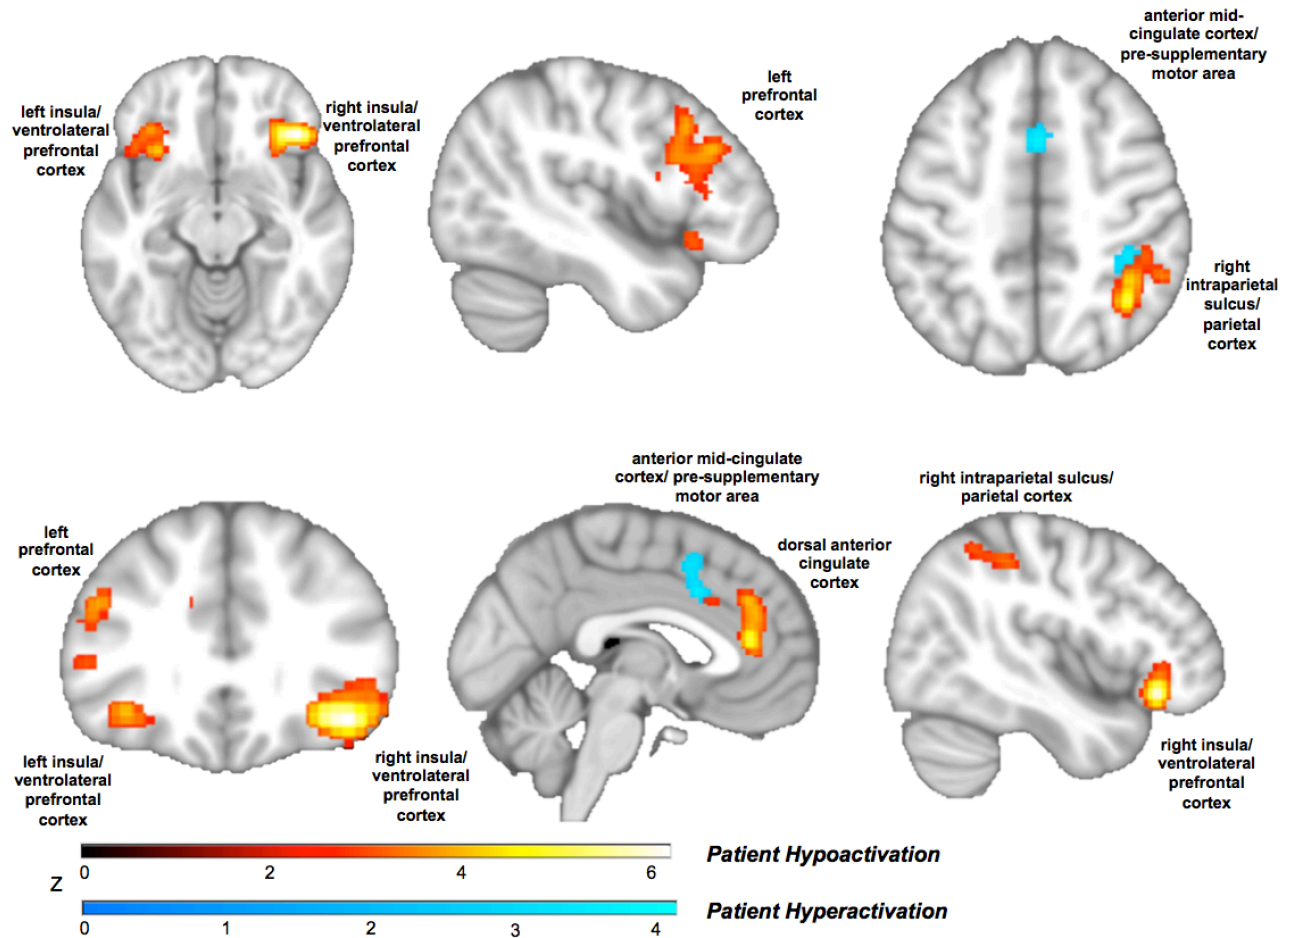

Supplementary Figure 3. ALE analyses with the single SPECT and single ASL studies excluded did not affect the pattern of significant activations. For example, patient hyperactivation (blue) and hypoactivation (orange) across disorders are displayed for the remaining studies (n=260 functional magnetic resonance imaging; n=21 positron emission tomography).



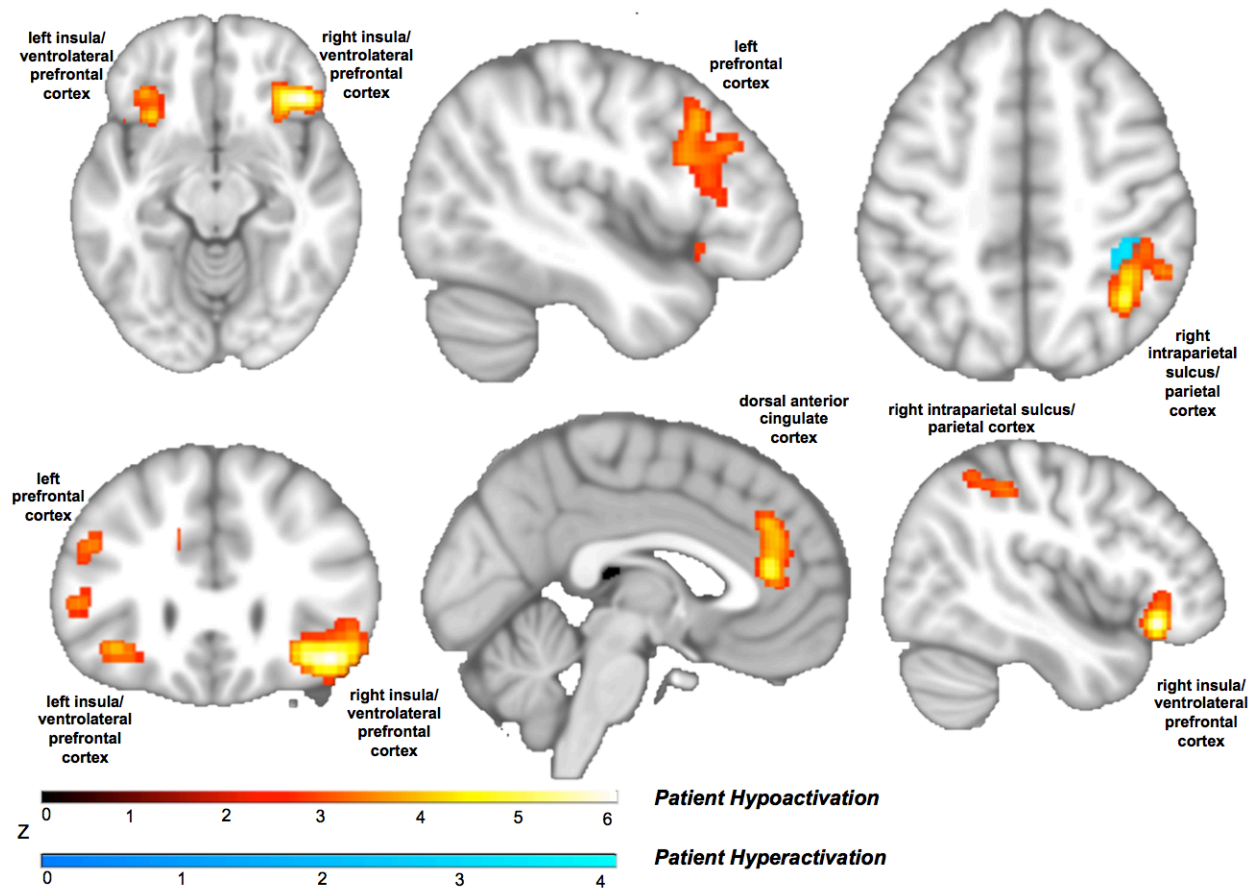

Supplementary Figure 4. ALE analyses excluding the 18 diverse studies that did not cohere into any specific domain resulted in little change to the overall patterns, with the exception of no significant anterior mid-cingulate cortex/pre-supplementary motor area activation. For example, patient hypo- (orange) and hyperactivation (blue) across disorders are displayed for the remaining 265 studies.

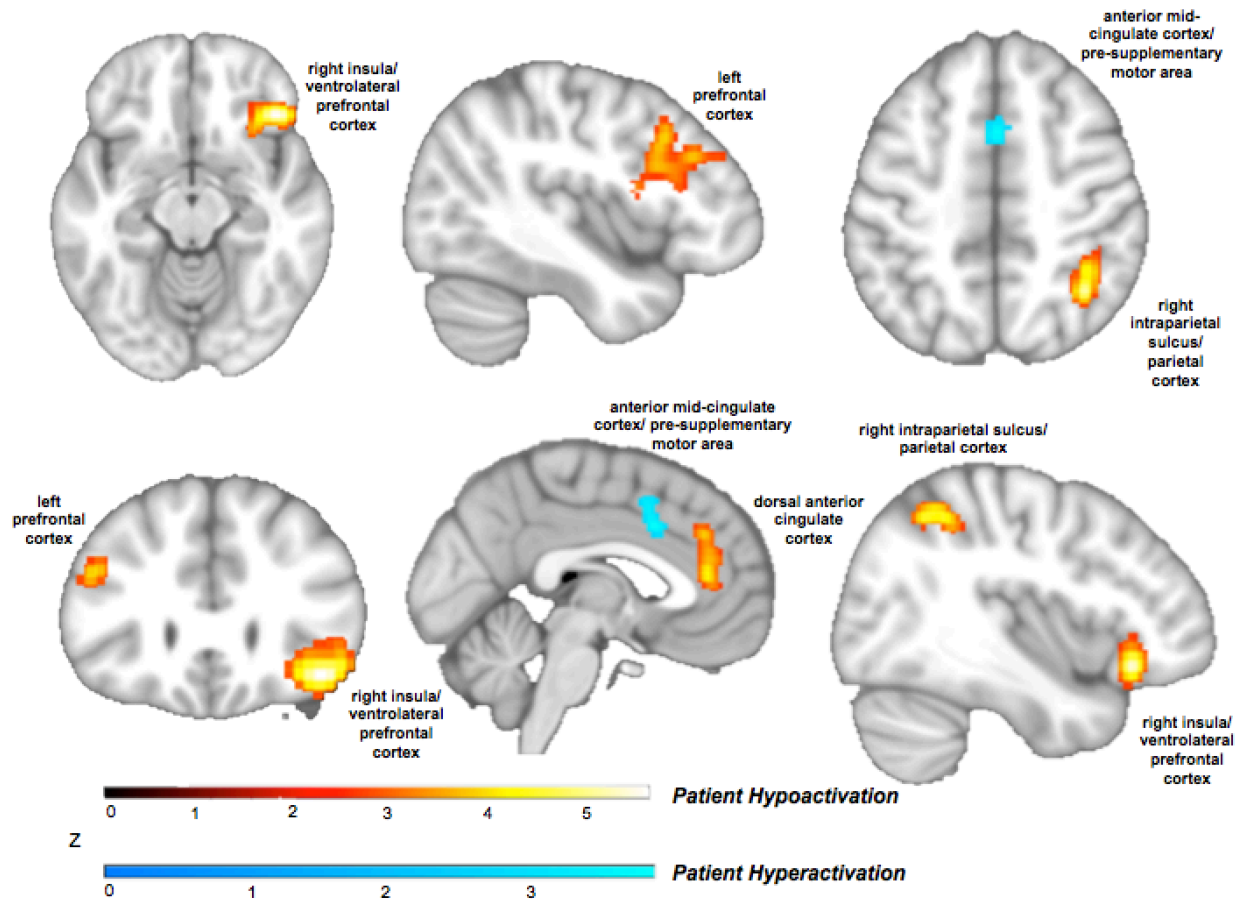

Supplementary Figure 5. Results from separate ALE analyses for studies of children, adults and older adults showed that the overall pattern was primarily determined by the adult sample, the largest proportion of studies ( $n=248$ ; 18-50 years). The child ( $n=27$ ; <18 years) and older adult ( $n=8$ ; >50 years) samples did not show any significant whole-brain activations. Displayed are the patient hypo- (orange) and hyperactivation (blue) across disorders for the subset of adult studies.

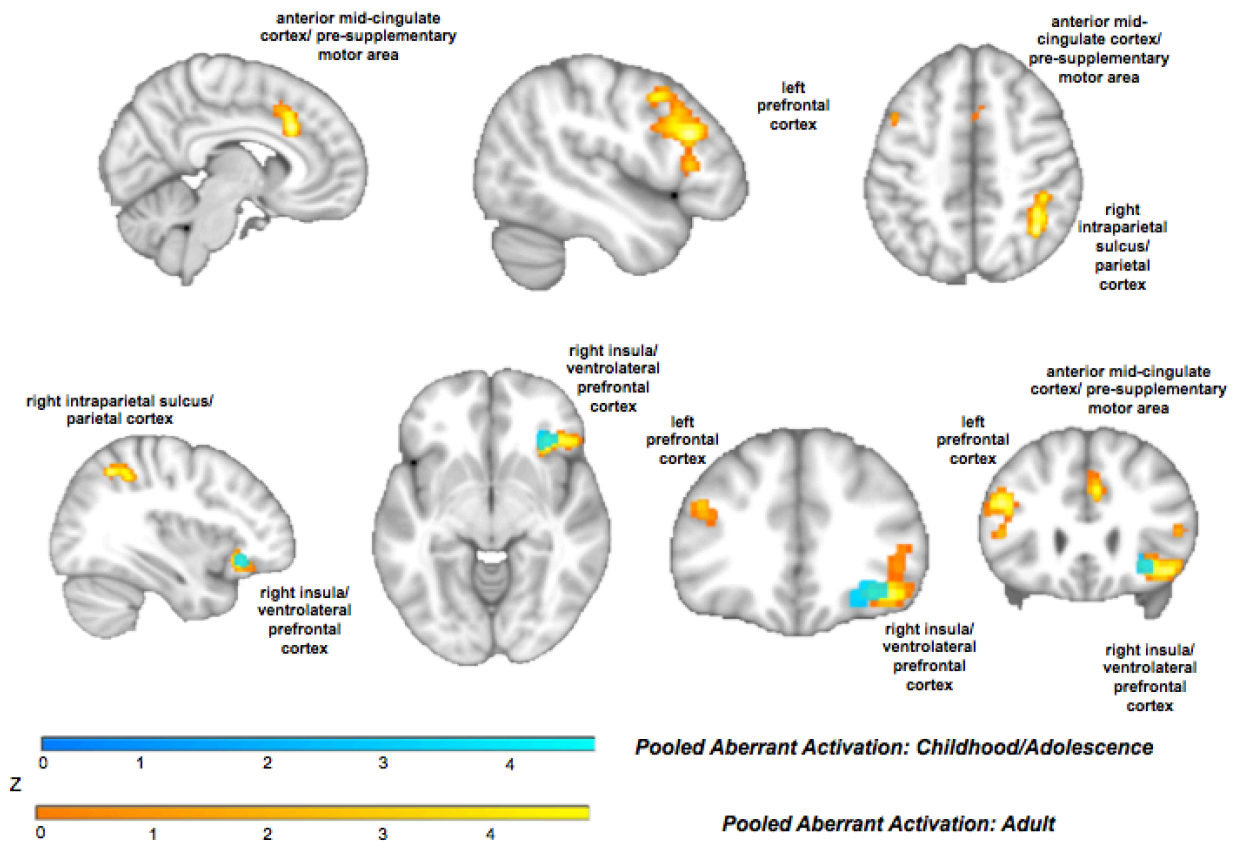

Supplementary Figure 6. Patterns of “aberrant activation” (orange) when pooling across patient hyper- and hypoactivation foci across the whole brain separately for childhood/adolescence (<18 years; blue) and adulthood (18-50 years; orange) experiments. The older adult (>50 years) experiments did not show any significant whole-brain activations. Given the strong right anterior insula/ventrolateral prefrontal cortex aberrant activation overlapping in the childhood/adolescence and the adulthood samples, this node may have a prominent role in cognitive dyscontrol from childhood through adulthood.

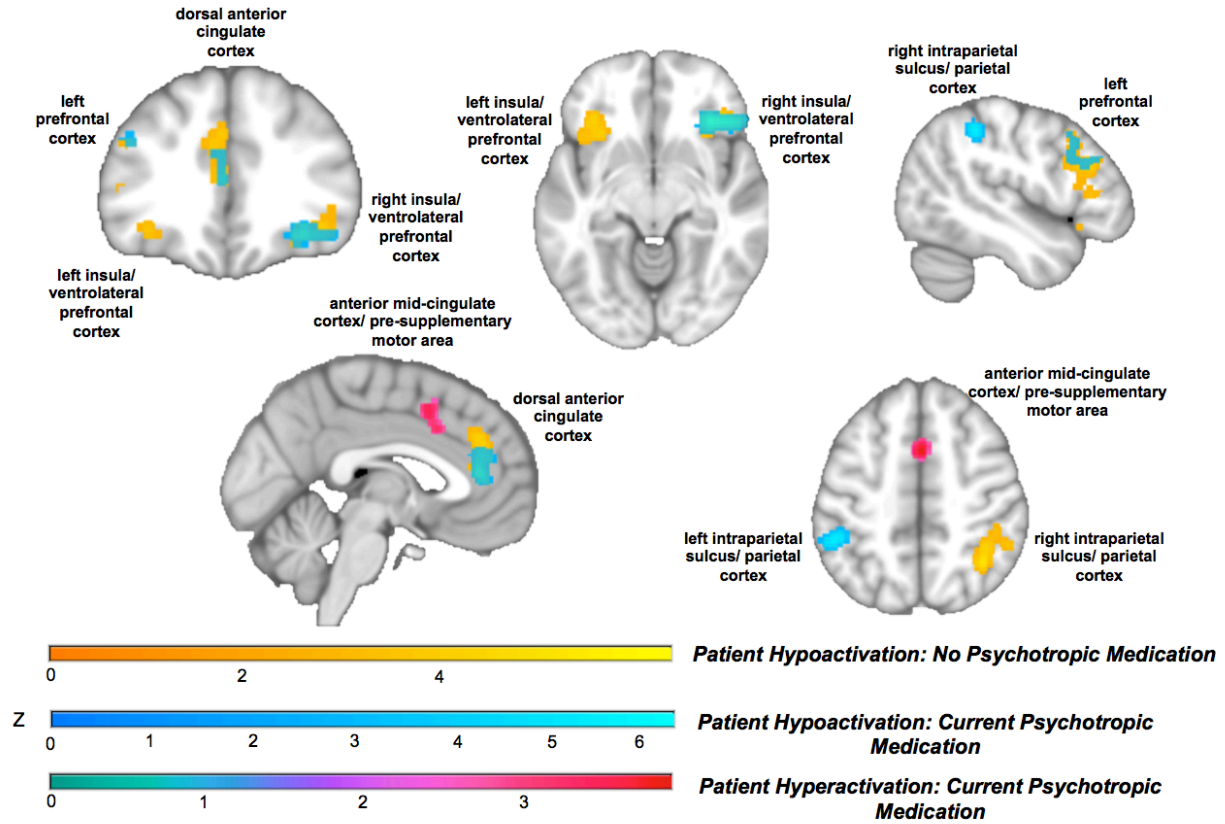

Supplementary Figure 7. Results from separate ALE analyses of patient hypo- and hyper-activation for studies of medicated and unmedicated patients. Unmedicated (blue) and medicated (yellow) patients showed similar patterns of hypoactivation. Medicated patients showed hyperactivation (magenta) specific to the anterior mid-cingulate cortex/pre-supplementary motor cortex. Unmedicated patient experiments as a whole did not show any significant whole-brain hyperactivations.

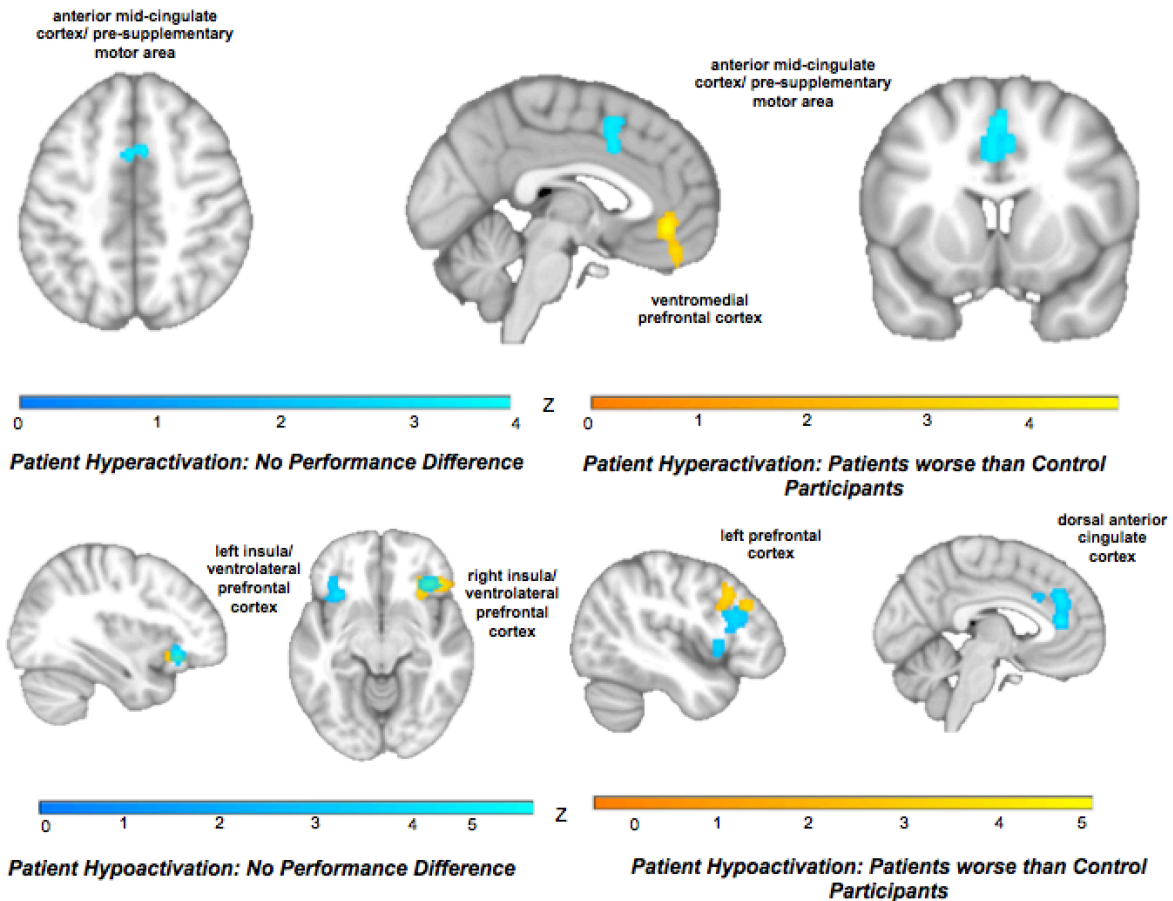

Supplementary Figure 8. Accounting for behavioral performance on the scanner task demonstrated that patient hyperactivation in the anterior mid-cingulate/ pre-supplementary motor cortex cluster was primarily driven by patient groups that performed on par with as opposed to worse than control participants. This was confirmed in a test of the extracted per voxel probabilities for this region of interest (Mann-Whitney U Test,  $U=9,270$ ,  $p<.05$ ). By contrast, patient hypoactivation in multiple demand network nodes were largely similar regardless of whether behavioral performance was impaired.

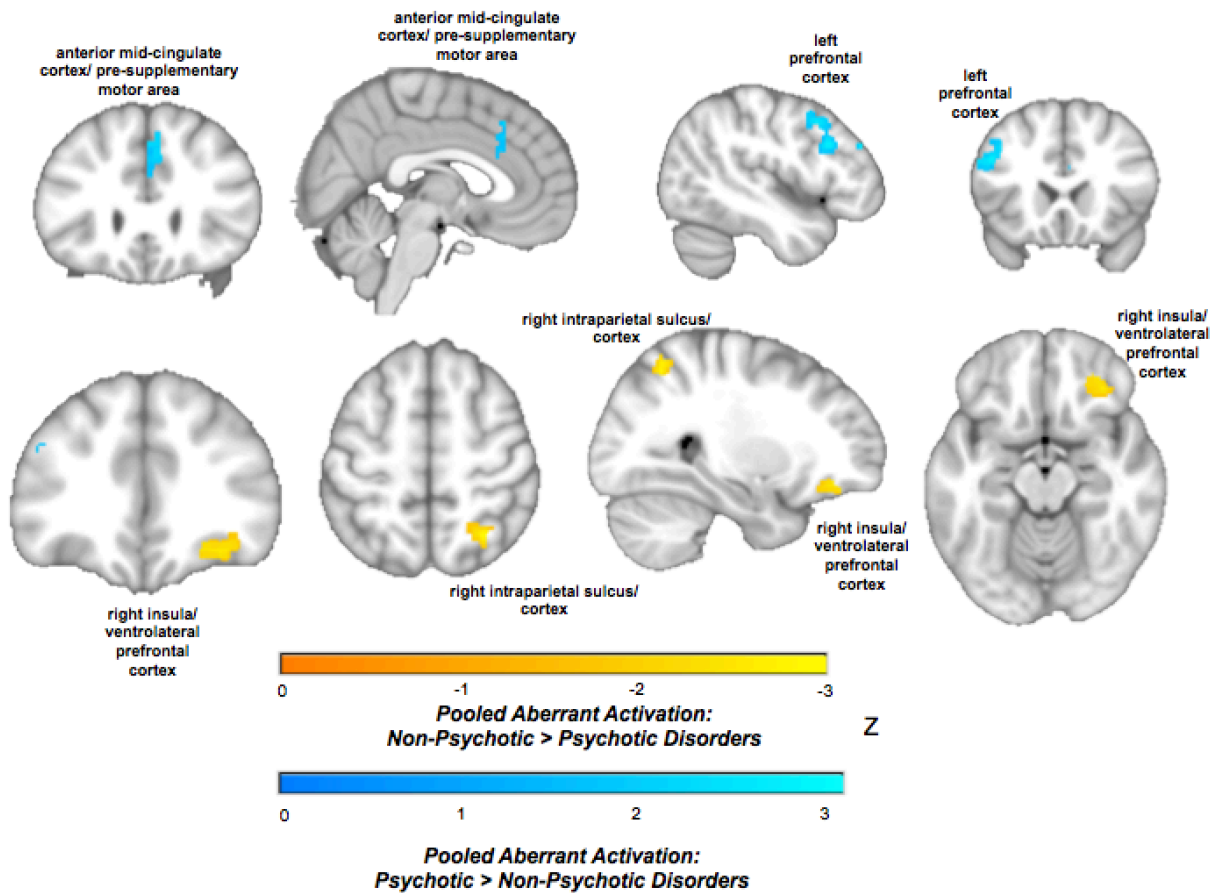

Supplementary Figure 9. A contrast between pooled aberrant activation in psychotic and non-psychotic disorders revealed greater aberrant activation in psychotic versus non-psychotic disorders in a more posterior portion of the left prefrontal cluster and a portion of the mid-cingulate/pre-supplementary motor area. Additionally non-psychotic disorders showed reliably more aberrant activation in right intraparietal sulcus and a more anterior portion of the right anterior insula/ventrolateral prefrontal cortex cluster.

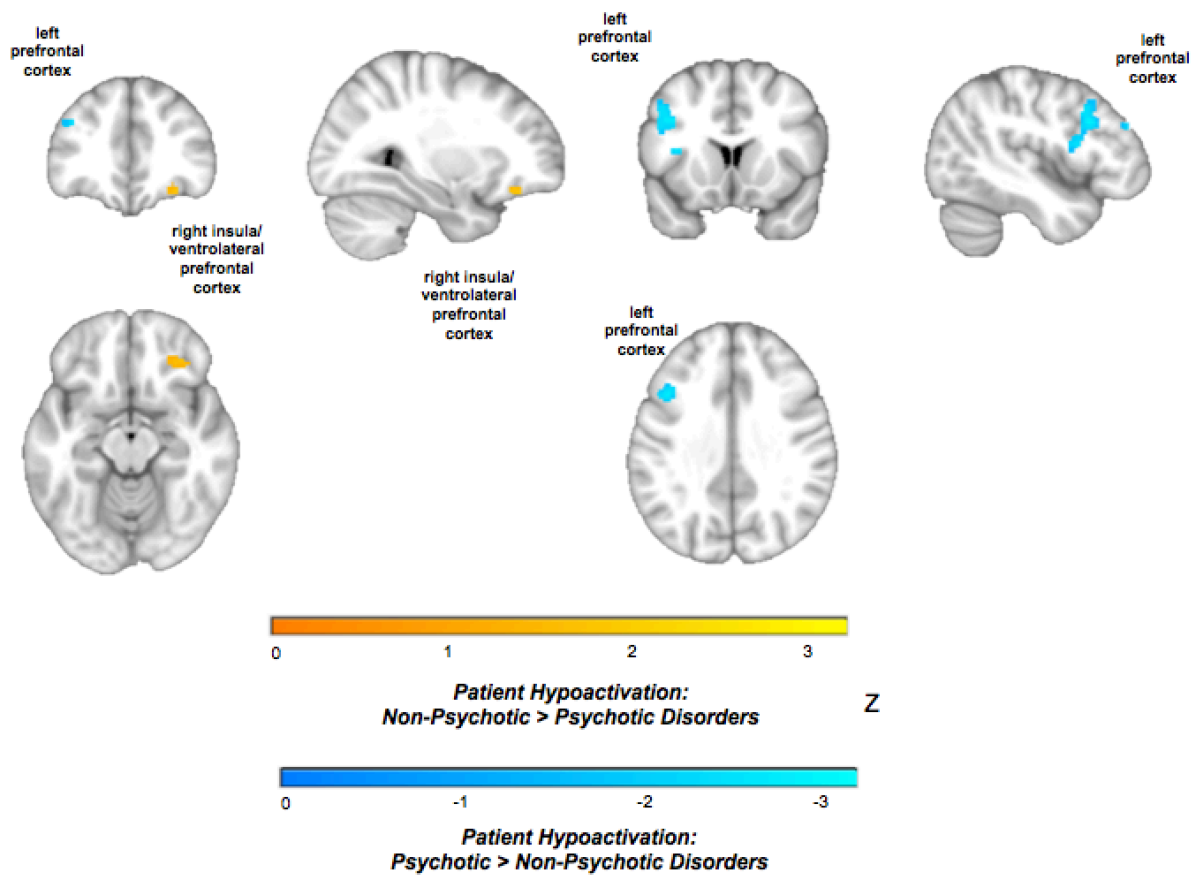

Supplementary Figure 10. A contrast between hypoactivation in psychotic and non-psychotic disorders showed that the right anterior insula/ ventrolateral prefrontal cortex extended more anteriorly in non-psychotic disorders, whereas psychotic disorders showed stronger hypoactivation in the posterior portion of the left prefrontal cluster.

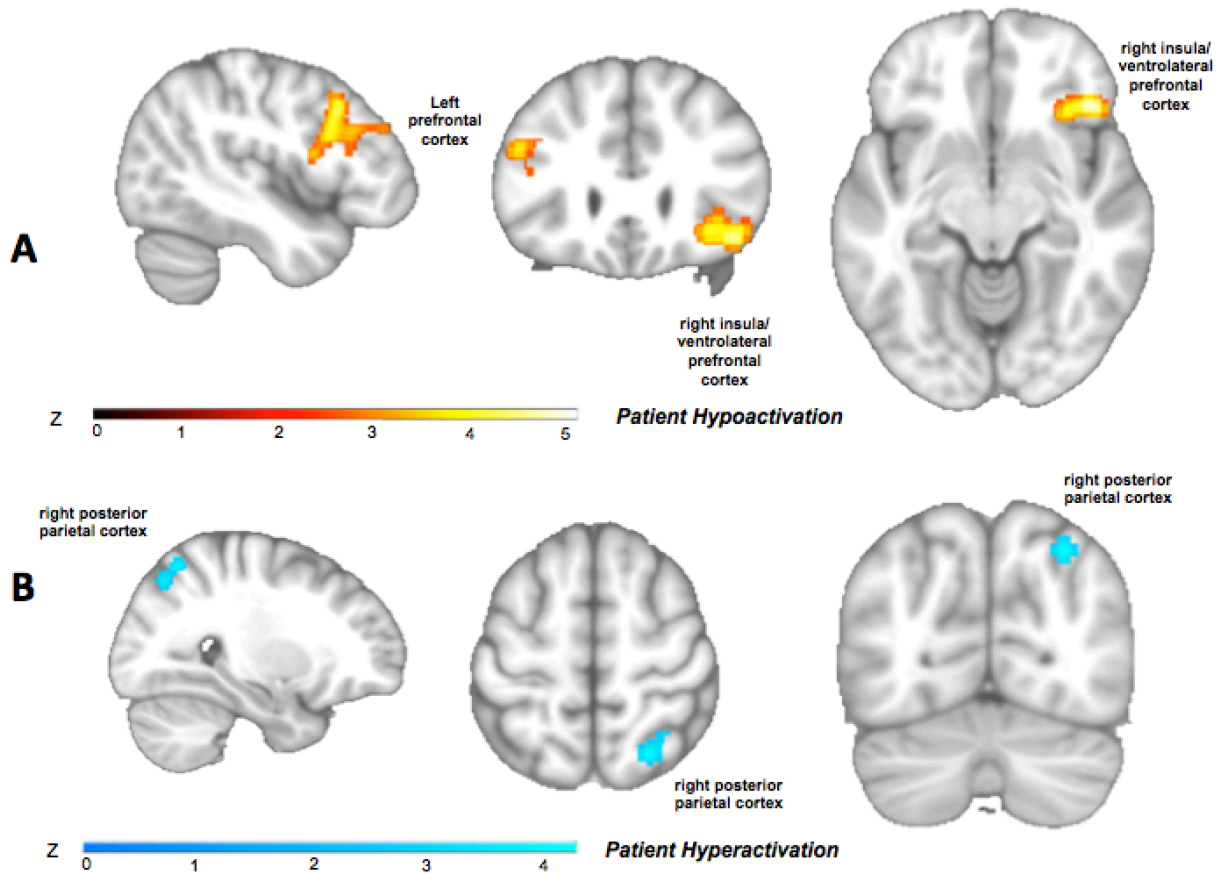

Supplementary Figure 11. Refining to diagnostic classes revealed few activations that survived whole-brain correction. A) Schizophrenia spectrum disorders showed a reliable hypoactivation of left prefrontal cortex and right anterior insula/ventrolateral prefrontal cortex consistent with the overall pattern (orange). B) Substance use disorders showed patient hyperactivation in right posterior parietal cortex (more posterior than the overall pattern; blue). Contrasts specific to anxiety as well as bipolar and unipolar depressive disorders did not show any significant whole-brain activations.



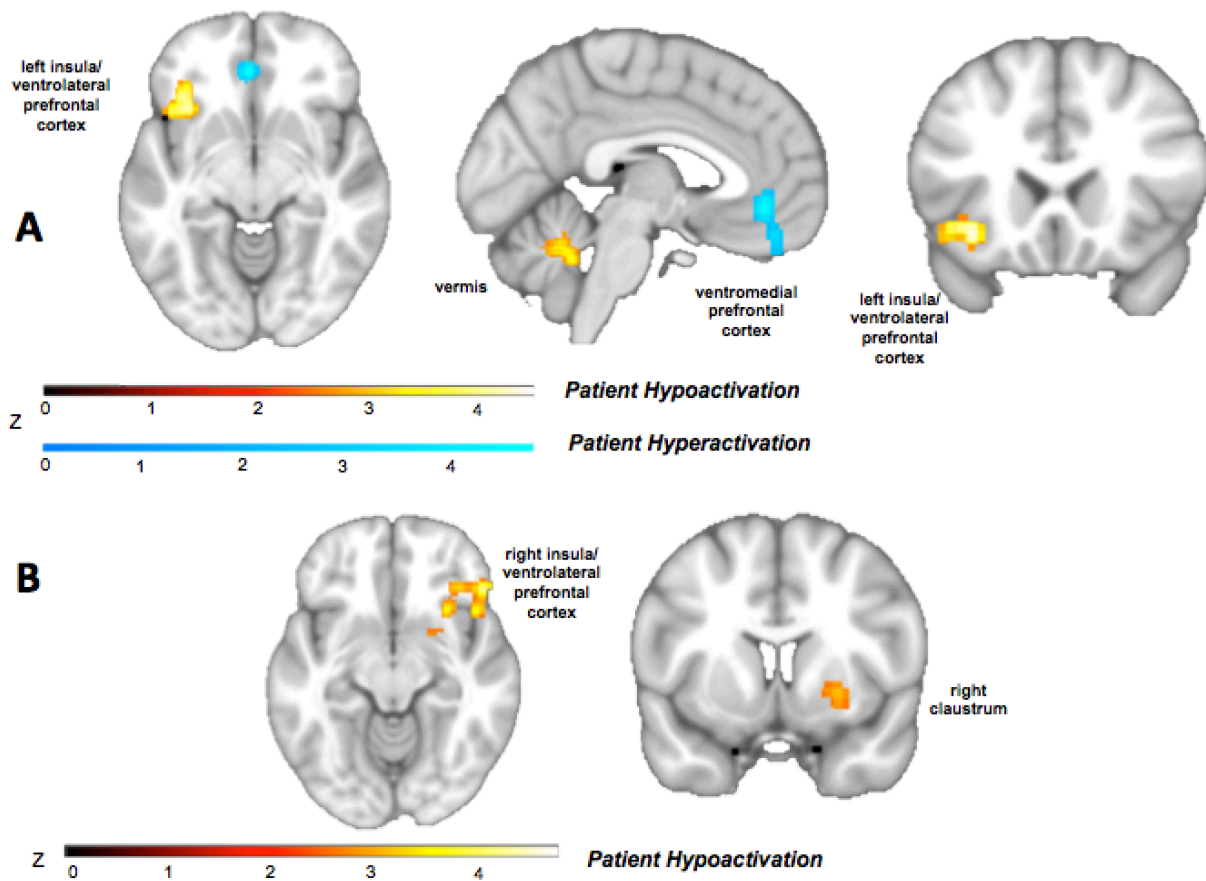

Supplementary Figure 12. Domain-specific analyses were performed on domains with contrasts from more than 20 experiments and thus adequate power to detect convergence (i.e., working memory (n=100), response inhibition (n=42), recognition memory (n=37), conflict monitoring (n=31)). A) During working memory tasks patient hyperactivation (blue) was observed in in ventromedial prefrontal cortex and hypoactivation (orange) in left anterior insula/ventrolateral prefrontal cortex. B) During response inhibition hyperactivation was evident in the right anterior insula/ ventrolateral prefrontal cortex and right claustrum (B). Recognition memory and conflict monitoring contrasts showed no significant whole-brain activations.

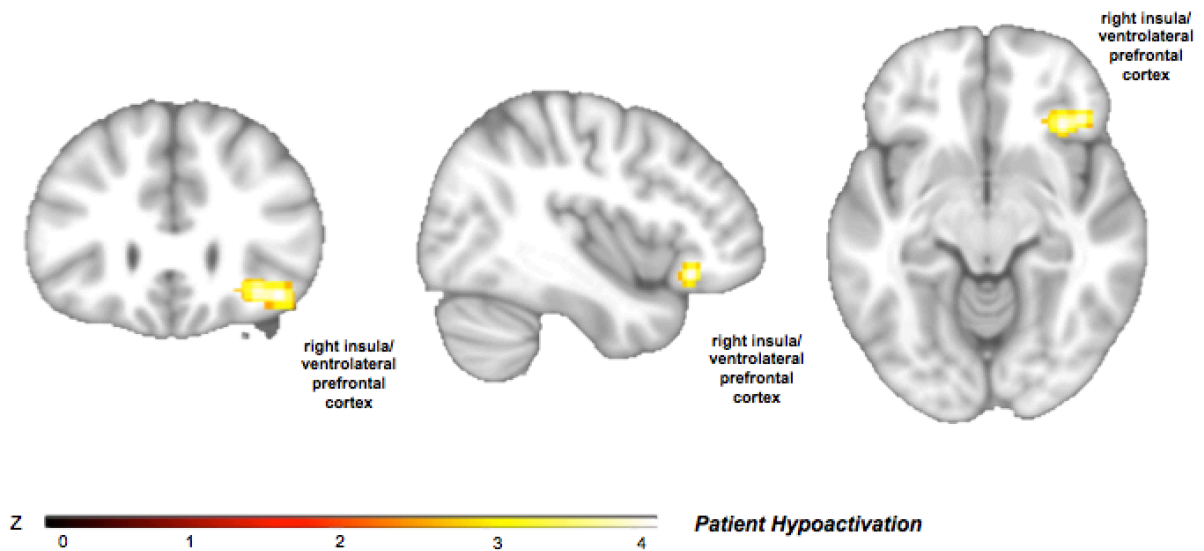

Supplementary Figure 13. ALE by Disorder and Domain. Schizophrenia spectrum disorders showed patient hypoactivation in right insula/ventrolateral prefrontal cortex during working memory (yellow). Other contrasts by disorder and domain showed no significant whole-brain activations, though this included too few studies for valid for ALE inference (31).

Supplementary Table 1. Experiments included in meta-analysis by diagnostic grouping, modality, domain and task

| Ref # | Experiment # | PUBMEDID | Diagnostic Group | Imaging Modality | Domain              | Task                      |
|-------|--------------|----------|------------------|------------------|---------------------|---------------------------|
| 1     | 1            | 17768265 | Schizophrenia    | MRI              | Recognition Memory  | Recognition               |
| 2     | 2            | 15541070 | Bipolar          | MRI              | Working Memory      | N-back                    |
| 3     | 3            | 20146832 | Bipolar          | MRI              | Verbal Fluency      | Verbal Fluency            |
| 4     | 4            | 8790444  | Schizophrenia    | PET              | Other               | Recall                    |
| 5     | 5            | 21914644 | Schizophrenia    | MRI              | Working Memory      | Delayed Match-to-sample   |
| 6     | 6            | 16199012 | Schizophrenia    | MRI              | Other               | Recall                    |
| 7     | 7            | 16640486 | Anxiety          | MRI              | Working Memory      | Virtual Morris Water task |
| 8     | 8            | 24022592 | Bipolar          | MRI              | Recognition Memory  | Transitive Inference      |
| 9     | 9            | 21782395 | Schizophrenia    | MRI              | Working Memory      | Delayed Match-to-sample   |
| 10    | 10           | 24381810 | Schizophrenia    | MRI              | Response Selection  | Delay Discounting         |
| 11    | 11           | 22805228 | Substance Use    | MRI              | Working Memory      | Spatial Working Memory    |
| 12    | 12           | 24557502 | Unipolar         | MRI              | Verbal Fluency      | Verbal Fluency            |
| 13    | 13           | 24296894 | Substance Use    | MRI              | Other               | Semantic Decision Making  |
| 14    | 14           | 17499456 | Substance Use    | MRI              | Conflict Monitoring | Stroop                    |
| 15    | 15           | 12150424 | Schizophrenia    | MRI              | Working Memory      | N-back                    |
| 16    | 16           | 12614990 | Unipolar         | MRI              | Working Memory      | N-back                    |
| 17    | 17           | 16952445 | Schizophrenia    | MRI              | Working Memory      | N-back                    |
| 18    | 18           | 24675869 | Schizophrenia    | MRI              | Working Memory      | Delayed Match-to-sample   |
| 19    | 19           | 12796223 | Bipolar          | MRI              | Conflict Monitoring | Stroop                    |
| 20    | 20           | 21997605 | Unipolar         | MRI              | Response            | Stop Signal               |

|    |    |          |               |     |                               |                                  |
|----|----|----------|---------------|-----|-------------------------------|----------------------------------|
| 21 | 21 | 12880834 | Substance Use | PET | Inhibition Response Selection | Task Modified Iowa Gambling Task |
| 22 | 22 | 21067898 | Schizophrenia | MRI | Working Memory                | N-back                           |
| 23 | 23 | 25752642 | Bipolar       | MRI | Working Memory                | N-back                           |
| 24 | 24 | 19118321 | Schizophrenia | MRI | Verbal Fluency                | Verbal Fluency                   |
| 24 | 25 | 19118321 | Schizophrenia | MRI | Working Memory                | N-back                           |
| 25 | 26 | 22272986 | Bipolar       | MRI | Working Memory                | N-back                           |
| 26 | 27 | 11053229 | Schizophrenia | MRI | Working Memory                | N-back                           |
| 27 | 28 | 14638592 | Schizophrenia | MRI | Working Memory                | N-back                           |
| 28 | 29 | 9396944  | Schizophrenia | PET | Conflict Monitoring           | Stroop                           |
| 29 | 30 | 22640382 | Bipolar       | MRI | Response Inhibition           | Continuous Performance Task      |
| 30 | 31 | 21376542 | Bipolar       | MRI | Verbal Fluency                | Hayling Sentence Completion Test |
| 31 | 32 | 15289277 | Bipolar       | MRI | Working Memory                | N-back                           |
| 32 | 33 | 19538748 | Anxiety       | MRI | Recognition Memory            | Recognition                      |
| 33 | 34 | 20046409 | Schizophrenia | MRI | Conflict Monitoring           | Stroop                           |
| 34 | 35 | 10080553 | Schizophrenia | PET | Other                         | Recall                           |
| 34 | 36 | 10080553 | Schizophrenia | PET | Other                         | Recall                           |
| 35 | 37 | 11241873 | Schizophrenia | PET | Recognition Memory            | Recognition                      |
| 36 | 38 | 22539776 | Schizophrenia | MRI | Other                         | Recall                           |
| 37 | 39 | 9699694  | Schizophrenia | MRI | Verbal Fluency                | Verbal Fluency                   |
| 38 | 40 | 10227106 | Schizophrenia | MRI | Other                         | Semantic Decision Making         |
| 39 | 41 | 11578663 | Bipolar       | MRI | Verbal Fluency                | Verbal Fluency                   |
| 39 | 42 | 11578663 | Bipolar       | MRI | Verbal Fluency                | Semantic Decision Making         |

|    |    |          |               |     |                     |                               |
|----|----|----------|---------------|-----|---------------------|-------------------------------|
| 40 | 43 | 17547582 | Bipolar       | MRI | Verbal Fluency      | Verbal Fluency                |
| 41 | 44 | 23949205 | Substance Use | MRI | Recognition Memory  | Recognition                   |
| 42 | 45 | 14561934 | Substance Use | MRI | Working Memory      | N-back                        |
| 43 | 46 | 14597698 | Schizophrenia | MRI | Conflict Monitoring | Stroop                        |
| 44 | 47 | 12948707 | Substance Use | MRI | Working Memory      | Sternberg Working Memory Task |
| 45 | 48 | 24639328 | Unipolar      | MRI | Recognition Memory  | Recognition                   |
| 46 | 49 | 23607410 | Bipolar       | MRI | Response Inhibition | Go/No-Go                      |
| 47 | 50 | 18571627 | Bipolar       | MRI | Working Memory      | N-back                        |
| 48 | 51 | 25458072 | Unipolar      | MRI | Working Memory      | N-back                        |
| 49 | 52 | 24239131 | Schizophrenia | MRI | Working Memory      | Recognition                   |
| 50 | 53 | 15528091 | Substance Use | PET | Conflict Monitoring | Stroop                        |
| 51 | 54 | 17018171 | Anxiety       | MRI | Working Memory      | N-back                        |
| 52 | 55 | 21331519 | Schizophrenia | MRI | Working Memory      | N-back                        |
| 53 | 56 | 18787658 | Anxiety       | MRI | Response Inhibition | Go/No-Go                      |
| 53 | 57 | 18787658 | Anxiety       | MRI | Response Inhibition | Go/No-Go                      |
| 54 | 58 | 24615691 | Schizophrenia | MRI | Conflict Monitoring | Stroop                        |
| 55 | 59 | 22854099 | Bipolar       | MRI | Working Memory      | N-back                        |
| 56 | 60 | 15691530 | Anxiety       | MRI | Conflict Monitoring | Flanker                       |
| 57 | 61 | 17525987 | Unipolar      | MRI | Response Selection  | Tower of London               |
| 57 | 62 | 17525987 | Unipolar      | MRI | Working Memory      | N-back                        |
| 58 | 63 | 21546091 | Bipolar       | MRI | Response Inhibition | Go/No-Go                      |
| 59 | 64 | 25749917 | Schizophrenia | MRI | Recognition Memory  | Recognition                   |
| 60 | 65 | 22363273 | Bipolar       | MRI | Conflict Monitoring | Stroop                        |
| 61 | 66 | 18485592 | Substance     | MRI | Response            | Go/No-Go                      |

|    |    |          | Use              |     | Inhibition             |                                      |
|----|----|----------|------------------|-----|------------------------|--------------------------------------|
| 62 | 67 | 8988793  | Schizophrenia    | PET | Other                  | Recall                               |
| 63 | 68 | 25037555 | Schizophrenia    | MRI | Other                  | Finger<br>Tapping                    |
| 63 | 69 | 25037555 | Unipolar         | MRI | Other                  | Finger<br>Tapping                    |
| 64 | 70 | 20063304 | Bipolar          | MRI | Recognition<br>Memory  | Recognition                          |
| 65 | 71 | 18065438 | Anxiety          | MRI | Set Shifting           | Set Shifting                         |
| 66 | 72 | 21733286 | Schizophrenia    | MRI | Working<br>Memory      | N-back                               |
| 67 | 73 | 19175815 | Unipolar         | MRI | Response<br>Inhibition | Simon Task                           |
| 67 | 74 | 19175815 | Unipolar         | MRI | Response<br>Inhibition | Stop Signal<br>Task                  |
| 67 | 75 | 19175815 | Unipolar         | MRI | Set Shifting           | Switch Task                          |
| 68 | 76 | 19732478 | Schizophrenia    | MRI | Recognition<br>Memory  | Recognition                          |
| 69 | 77 | 19449330 | Schizophrenia    | MRI | Working<br>Memory      | Delayed<br>Match-to-<br>sample       |
| 69 | 78 | 19449330 | Bipolar          | MRI | Working<br>Memory      | Delayed<br>Match-to-<br>sample       |
| 70 | 79 | 24672002 | Substance<br>Use | MRI | Response<br>Inhibition | Stop Signal<br>Task                  |
| 71 | 80 | 17307337 | Schizophrenia    | MRI | Working<br>Memory      | Multi-Source<br>Interference<br>Task |
| 72 | 81 | 17803757 | Schizophrenia    | MRI | Working<br>Memory      | Multi-Source<br>Interference<br>Task |
| 73 | 82 | 15955496 | Unipolar         | MRI | Working<br>Memory      | N-back                               |
| 74 | 83 | 25610794 | Schizophrenia    | MRI | Recognition<br>Memory  | Source<br>Memory                     |
| 75 | 84 | 10195166 | Schizophrenia    | PET | Other                  | Recall                               |
| 76 | 85 | 16497485 | Schizophrenia    | MRI | Other                  | Recall                               |
| 77 | 86 | 18592040 | Anxiety          | MRI | Working<br>Memory      | Delayed<br>Match-to-<br>sample       |
| 77 | 87 | 18592040 | Anxiety          | MRI | Working<br>Memory      | Delayed<br>Match-to-<br>sample       |
| 77 | 88 | 18592040 | Anxiety          | MRI | Working<br>Memory      | Delayed<br>Match-to-<br>sample       |
| 78 | 89 | 19686473 | Schizophrenia    | MRI | Working<br>Memory      | Delayed<br>Match-to-                 |

|    |     |          |               |     |                     |                                   |
|----|-----|----------|---------------|-----|---------------------|-----------------------------------|
| 78 | 90  | 19686473 | Schizophrenia | MRI | Working Memory      | sample<br>Delayed Match-to-sample |
| 79 | 91  | 15590917 | Substance Use | MRI | Response Inhibition | Go/No-Go                          |
| 80 | 92  | 12727695 | Schizophrenia | MRI | Recognition Memory  | Recognition                       |
| 81 | 93  | 14514494 | Schizophrenia | MRI | Recognition Memory  | Recognition                       |
| 82 | 94  | 12946085 | Schizophrenia | MRI | Working Memory      | N-back                            |
| 83 | 95  | 14754778 | Unipolar      | MRI | Working Memory      | Mental Arithmetic                 |
| 83 | 96  | 14754778 | Schizophrenia | MRI | Working Memory      | Mental Arithmetic                 |
| 84 | 97  | 20036266 | Schizophrenia | MRI | Set Shifting        | Wisconsin Card Sorting Task       |
| 85 | 98  | 22985694 | Schizophrenia | MRI | Recognition Memory  | Recognition                       |
| 85 | 99  | 22985694 | Bipolar       | MRI | Recognition Memory  | Recognition                       |
| 86 | 100 | 16054343 | Schizophrenia | MRI | Conflict Monitoring | Stroop                            |
| 87 | 101 | 21812622 | Bipolar       | MRI | Response Selection  | Modified Iowa Gambling Task       |
| 87 | 102 | 21812622 | Bipolar       | MRI | Working Memory      | N-back                            |
| 88 | 103 | 21357880 | Schizophrenia | MRI | Verbal Fluency      | Verbal Fluency                    |
| 89 | 104 | 16503328 | Schizophrenia | MRI | Recognition Memory  | Recognition                       |
| 90 | 105 | 15601603 | Schizophrenia | MRI | Verbal Fluency      | Verbal Fluency                    |
| 91 | 106 | 17291724 | Schizophrenia | MRI | Response Inhibition | Go/No-Go                          |
| 91 | 107 | 17291724 | Schizophrenia | MRI | Response Inhibition | Go/No-Go                          |
| 92 | 108 | 17855057 | Schizophrenia | MRI | Response Inhibition | Go/No-Go                          |
| 93 | 109 | 19624392 | Bipolar       | MRI | Response Inhibition | Go/No-Go                          |
| 94 | 110 | 19442494 | Bipolar       | MRI | Response Inhibition | Go/No-Go                          |
| 95 | 111 | 15205869 | Substance Use | MRI | Working Memory      | Delayed Match-to-                 |

|     |     |          |               |     |                        |                                   |
|-----|-----|----------|---------------|-----|------------------------|-----------------------------------|
| 96  | 112 | 21703287 | Schizophrenia | MRI | Working Memory         | sample<br>Delayed Match-to-sample |
| 97  | 113 | 23146681 | Anxiety       | MRI | Response Inhibition    | Go/No-Go                          |
| 98  | 114 | 19426993 | Schizophrenia | MRI | Working Memory         | N-back                            |
| 99  | 115 | 16199829 | Schizophrenia | MRI | Conflict Monitoring    | Stroop                            |
| 100 | 116 | 22024484 | Bipolar       | MRI | Response Inhibition    | Go/No-Go                          |
| 101 | 117 | 11839367 | Unipolar      | PET | Performance Monitoring | Continuous Performance Task       |
| 102 | 118 | 11378312 | Schizophrenia | MRI | Verbal Fluency         | Verbal Fluency                    |
| 103 | 119 | 18356025 | Schizophrenia | MRI | Verbal Fluency         | Verbal Fluency                    |
| 104 | 120 | 24705568 | Substance Use | MRI | Conflict Monitoring    | Stroop                            |
| 105 | 121 | 18359576 | Schizophrenia | MRI | Working Memory         | Sternberg Working Memory Task     |
| 106 | 122 | 22349440 | Anxiety       | MRI | Working Memory         | N-back                            |
| 107 | 123 | 16411978 | Bipolar       | MRI | Conflict Monitoring    | Stroop                            |
| 108 | 124 | 24325976 | Schizophrenia | MRI | Response Selection     | Beads in the Bottle Task          |
| 109 | 125 | 22917204 | Schizophrenia | MRI | Working Memory         | N-back                            |
| 110 | 126 | 14683698 | Schizophrenia | MRI | Recognition Memory     | Recognition                       |
| 111 | 127 | 18504037 | Schizophrenia | MRI | Conflict Monitoring    | Semantic Decision Making          |
| 112 | 128 | 17476364 | Bipolar       | MRI | Working Memory         | Sternberg Working Memory Task     |
| 113 | 129 | 25331916 | Schizophrenia | MRI | Working Memory         | N-back                            |
| 114 | 130 | 17585888 | Unipolar      | MRI | Response Inhibition    | Go/No-Go                          |
| 115 | 131 | 12566282 | Schizophrenia | MRI | Response Inhibition    | Go/No-Go                          |
| 116 | 132 | 20488673 | Schizophrenia | MRI | Recognition            | Recognition                       |



|     |     |          |               |     |                               |                                  |
|-----|-----|----------|---------------|-----|-------------------------------|----------------------------------|
| 117 | 133 | 24179809 | Schizophrenia | MRI | Memory Performance Monitoring | Continuous Performance Task      |
| 118 | 134 | 25588194 | Schizophrenia | MRI | Performance Monitoring        | Continuous Performance Task      |
| 119 | 135 | 14511805 | Schizophrenia | MRI | Recognition Memory            | Recognition                      |
| 120 | 136 | 17895916 | Substance Use | MRI | Response Inhibition           | Stop Signal Task                 |
| 121 | 137 | 19170662 | Substance Use | MRI | Response Inhibition           | Stop Signal Task                 |
| 122 | 138 | 25497221 | Schizophrenia | ASL | Response Selection            | Tower of London                  |
| 123 | 139 | 19693783 | Schizophrenia | MRI | Working Memory                | Delayed Match-to-sample          |
| 124 | 140 | 22583916 | Schizophrenia | MRI | Working Memory                | N-back                           |
| 125 | 141 | 25242360 | Schizophrenia | MRI | Working Memory                | N-back                           |
| 126 | 142 | 15627591 | Anxiety       | MRI | Response Inhibition           | Go/No-Go                         |
| 127 | 143 | 23489416 | Anxiety       | MRI | Conflict Monitoring           | Simon Task                       |
| 128 | 144 | 16983390 | Unipolar      | MRI | Working Memory                | N-back                           |
| 129 | 145 | 24262681 | Schizophrenia | MRI | Working Memory                | Sternberg Working Memory Task    |
| 130 | 146 | 19239982 | Unipolar      | MRI | Response Inhibition           | Stop Signal Task                 |
| 131 | 147 | 18586275 | Bipolar       | MRI | Response Inhibition           | Go/No-Go                         |
| 132 | 148 | 11839364 | Schizophrenia | MRI | Response Inhibition           | Antisaccade                      |
| 133 | 149 | 18198268 | Bipolar       | MRI | Verbal Fluency                | Hayling Sentence Completion Test |
| 133 | 150 | 18198268 | Schizophrenia | MRI | Verbal Fluency                | Hayling Sentence Completion Test |
| 134 | 151 | 24119150 | Bipolar       | MRI | Working Memory                | Delayed Match-to-sample          |

|     |     |          |               |     |                     |                             |
|-----|-----|----------|---------------|-----|---------------------|-----------------------------|
| 135 | 152 | 17151834 | Schizophrenia | MRI | Working Memory      | N-back                      |
| 136 | 153 | 15841676 | Schizophrenia | MRI | Working Memory      | N-back                      |
| 137 | 154 | 11691686 | Schizophrenia | PET | Working Memory      | N-back                      |
| 138 | 155 | 15221201 | Substance Use | MRI | Working Memory      | Delayed Match-to-sample     |
| 139 | 156 | 20153142 | Substance Use | MRI | Working Memory      | Delayed Match-to-sample     |
| 140 | 157 | 24258223 | Substance Use | MRI | Conflict Monitoring | Stroop                      |
| 141 | 158 | 15541071 | Bipolar       | MRI | Working Memory      | N-back                      |
| 142 | 159 | 23609131 | Substance Use | MRI | Response Inhibition | Stop Signal Task            |
| 143 | 160 | 18667293 | Anxiety       | MRI | Conflict Monitoring | Stroop                      |
| 144 | 161 | 20219248 | Unipolar      | MRI | Other               | Serial Reaction Time Task   |
| 145 | 162 | 15970434 | Anxiety       | MRI | Conflict Monitoring | Stroop                      |
| 146 | 163 | 19081580 | Anxiety       | MRI | Working Memory      | N-back                      |
| 147 | 164 | 19105218 | Anxiety       | MRI | Conflict Monitoring | Stroop                      |
| 148 | 165 | 18076530 | Bipolar       | MRI | Set Shifting        | Switch Task                 |
| 149 | 166 | 22047731 | Substance Use | MRI | Conflict Monitoring | Stroop                      |
| 150 | 167 | 24120302 | Schizophrenia | MRI | Response Inhibition | Continuous Performance Task |
| 151 | 168 | 23764381 | Bipolar       | MRI | Recognition Memory  | Recognition                 |
| 152 | 169 | 25164120 | Bipolar       | MRI | Recognition Memory  | Recognition                 |
| 153 | 170 | 24841112 | Schizophrenia | MRI | Working Memory      | N-back                      |
| 154 | 171 | 12353245 | Schizophrenia | PET | Working Memory      | Match Stimuli               |
| 155 | 172 | 16585464 | Schizophrenia | MRI | Recognition Memory  | Recognition                 |
| 156 | 173 | 21727234 | Schizophrenia | MRI | Working Memory      | N-back                      |
| 157 | 174 | 18072830 | Substance Use | MRI | Working Memory      | N-back                      |

|     |     |          |               |     |                        |                             |
|-----|-----|----------|---------------|-----|------------------------|-----------------------------|
| 158 | 175 | 18788030 | Schizophrenia | MRI | Working Memory         | N-back                      |
| 159 | 176 | 19906516 | Anxiety       | MRI | Conflict Monitoring    | Stroop                      |
| 159 | 177 | 19906516 | Anxiety       | MRI | Response Inhibition    | Go/No-Go                    |
| 159 | 178 | 19906516 | Anxiety       | MRI | Set Shifting           | Switch Task                 |
| 160 | 179 | 19926457 | Bipolar       | MRI | Response Inhibition    | Go/No-Go                    |
| 161 | 180 | 12062884 | Schizophrenia | MRI | Response Selection     | Two-choice prediction task  |
| 162 | 181 | 11751032 | Substance Use | MRI | Response Selection     | Two-choice prediction task  |
| 163 | 182 | 20816040 | Bipolar       | MRI | Response Inhibition    | Stop Signal Task            |
| 164 | 183 | 22554566 | Schizophrenia | MRI | Set Shifting           | Wisconsin Card Sorting Task |
| 164 | 184 | 22554566 | Schizophrenia | MRI | Set Shifting           | Wisconsin Card Sorting Task |
| 164 | 185 | 22554566 | Schizophrenia | MRI | Set Shifting           | Wisconsin Card Sorting Task |
| 165 | 186 | 25555505 | Bipolar       | MRI | Response Inhibition    | Go/No-Go                    |
| 166 | 187 | 11431233 | Schizophrenia | MRI | Working Memory         | N-back                      |
| 167 | 188 | 11525339 | Substance Use | MRI | Working Memory         | N-back                      |
| 168 | 189 | 25497222 | Schizophrenia | MRI | Recognition Memory     | Recognition                 |
| 169 | 190 | 22585315 | Substance Use | MRI | Recognition Memory     | Recognition                 |
| 170 | 191 | 18507885 | Schizophrenia | MRI | Working Memory         | N-back                      |
| 171 | 192 | 21604958 | Bipolar       | MRI | Working Memory         | N-back                      |
| 172 | 193 | 25497296 | Bipolar       | MRI | Working Memory         | N-back                      |
| 172 | 194 | 25497296 | Bipolar       | MRI | Working Memory         | N-back                      |
| 172 | 195 | 25497296 | Bipolar       | MRI | Working Memory         | N-back                      |
| 173 | 196 | 11823264 | Schizophrenia | PET | Performance Monitoring | Continuous Performance Task |

|     |     |          |               |     |                        |                                  |
|-----|-----|----------|---------------|-----|------------------------|----------------------------------|
| 173 | 197 | 11823264 | Schizophrenia | PET | Performance Monitoring | Continuous Performance Task      |
| 174 | 198 | 24016726 | Schizophrenia | MRI | Working Memory         | N-back                           |
| 175 | 199 | 9673996  | Schizophrenia | PET | Set Shifting           | Wisconsin Card Sorting Task      |
| 175 | 200 | 9673996  | Schizophrenia | PET | Recognition Memory     | Recognition                      |
| 176 | 201 | 11431234 | Schizophrenia | PET | Recognition Memory     | Recognition                      |
| 177 | 202 | 15169688 | Schizophrenia | MRI | Recognition Memory     | Recognition                      |
| 178 | 203 | 16199830 | Schizophrenia | MRI | Recognition Memory     | Recognition                      |
| 179 | 204 | 18155880 | Schizophrenia | MRI | Verbal Fluency         | Verbal Fluency                   |
| 180 | 205 | 21907293 | Schizophrenia | MRI | Recognition Memory     | Recognition                      |
| 181 | 206 | 19224116 | Schizophrenia | MRI | Recognition Memory     | Recognition                      |
| 181 | 207 | 19224116 | Schizophrenia | MRI | Recognition Memory     | Recognition                      |
| 182 | 208 | 24382711 | Schizophrenia | MRI | Recognition Memory     | Recognition                      |
| 183 | 209 | 23637737 | Anxiety       | MRI | Set Shifting           | Switch Task                      |
| 183 | 210 | 23637737 | Unipolar      | MRI | Set Shifting           | Switch Task                      |
| 184 | 211 | 20417713 | Substance Use | MRI | Response Inhibition    | Go/No-Go                         |
| 185 | 212 | 19500088 | Bipolar       | MRI | Working Memory         | Delayed Match-to-sample          |
| 186 | 213 | 25066663 | Unipolar      | MRI | Working Memory         | N-back                           |
| 187 | 214 | 17511967 | Anxiety       | MRI | Response Inhibition    | Go/No-Go                         |
| 188 | 215 | 16837832 | Bipolar       | MRI | Conflict Monitoring    | Stroop                           |
| 189 | 216 | 20418447 | Schizophrenia | MRI | Recognition Memory     | Recognition                      |
| 190 | 217 | 19643585 | Schizophrenia | MRI | Response Inhibition    | Hayling Sentence Completion Test |
| 190 | 218 | 19643585 | Schizophrenia | MRI | Working Memory         | N-back                           |
| 191 | 219 | 11595391 | Schizophrenia | MRI | Response Inhibition    | Go/No-Go                         |

|     |     |          |               |     |                        |                               |
|-----|-----|----------|---------------|-----|------------------------|-------------------------------|
| 192 | 220 | 12732667 | Schizophrenia | PET | Working Memory         | N-back                        |
| 193 | 221 | 15006650 | Schizophrenia | MRI | Performance Monitoring | Continuous Performance Task   |
| 194 | 222 | 24332795 | Schizophrenia | MRI | Working Memory         | N-back                        |
| 194 | 223 | 24332795 | Schizophrenia | MRI | Working Memory         | N-back                        |
| 195 | 224 | 17097072 | Anxiety       | MRI | Other                  | Serial Reaction Time Task     |
| 196 | 225 | 17559877 | Schizophrenia | MRI | Working Memory         | N-back                        |
| 197 | 226 | 17707869 | Schizophrenia | MRI | Working Memory         | Sternberg Working Memory Task |
| 198 | 227 | 22137506 | Substance Use | MRI | Conflict Monitoring    | Stroop                        |
| 199 | 228 | 16002029 | Substance Use | MRI | Working Memory         | Delayed Match-to-sample       |
| 200 | 229 | 10855761 | Anxiety       | PET | Performance Monitoring | Continuous Performance Task   |
| 201 | 230 | 23036083 | Bipolar       | MRI | Performance Monitoring | Continuous Performance Task   |
| 202 | 231 | 16224612 | Schizophrenia | MRI | Verbal Fluency         | Verbal Fluency                |
| 203 | 232 | 20166792 | Bipolar       | MRI | Response Inhibition    | Go/No-Go                      |
| 204 | 233 | 20401748 | Substance Use | MRI | Working Memory         | N-back                        |
| 205 | 234 | 17136217 | Schizophrenia | PET | Other                  | Reading                       |
| 206 | 235 | 15173843 | Bipolar       | MRI | Performance Monitoring | Continuous Performance Task   |
| 207 | 236 | 16135630 | Bipolar       | MRI | Conflict Monitoring    | Stroop                        |
| 208 | 237 | 19190727 | Bipolar       | MRI | Response Inhibition    | Go/No-Go                      |
| 209 | 238 | 22475381 | Schizophrenia | MRI | Working Memory         | N-back                        |
| 210 | 239 | 18004121 | Schizophrenia | MRI | Working Memory         | N-back                        |
| 211 | 240 | 16199831 | Schizophrenia | MRI | Working Memory         | N-back                        |

|     |     |          |               |     |                        |                                 |
|-----|-----|----------|---------------|-----|------------------------|---------------------------------|
| 212 | 241 | 17074949 | Schizophrenia | MRI | Working Memory         | N-back                          |
| 213 | 242 | 17274020 | Substance Use | MRI | Response Selection     | Modified Iowa Gambling Task     |
| 214 | 243 | 11236838 | Substance Use | MRI | Working Memory         | N-back                          |
| 215 | 244 | 15597092 | Substance Use | MRI | Working Memory         | Recognition                     |
| 216 | 245 | 17558500 | Substance Use | MRI | Response Inhibition    | Go/No-Go                        |
| 217 | 246 | 18586109 | Unipolar      | MRI | Set Shifting           | Probabilistic Reversal Learning |
| 218 | 247 | 15380297 | Schizophrenia | MRI | Other                  | Semantic Decision Making        |
| 219 | 248 | 17765877 | Substance Use | MRI | Working Memory         | N-back                          |
| 220 | 249 | 22631623 | Bipolar       | MRI | Response Inhibition    | Go/No-Go                        |
| 221 | 250 | 14754781 | Schizophrenia | MRI | Performance Monitoring | Smooth Pursuit                  |
| 222 | 251 | 19963356 | Schizophrenia | MRI | Conflict Monitoring    | Stroop                          |
| 223 | 252 | 15753243 | Anxiety       | MRI | Response Selection     | Tower of London                 |
| 224 | 253 | 16045067 | Anxiety       | MRI | Conflict Monitoring    | Stroop                          |
| 225 | 254 | 24709020 | Unipolar      | MRI | Working Memory         | Spatial Working Memory          |
| 225 | 255 | 24709020 | Unipolar      | MRI | Working Memory         | Delayed Match-to-sample         |
| 226 | 256 | 18321870 | Schizophrenia | MRI | Recognition Memory     | Recognition                     |
| 227 | 257 | 12729869 | Schizophrenia | MRI | Working Memory         | N-back                          |
| 228 | 258 | 17197035 | Unipolar      | MRI | Working Memory         | Delayed Match-to-sample         |
| 229 | 259 | 17363277 | Schizophrenia | MRI | Working Memory         | Delayed Match-to-sample         |
| 230 | 260 | 24948034 | Unipolar      | MRI | Other                  | Recall                          |
| 231 | 261 | 12738340 | Schizophrenia | MRI | Conflict Monitoring    | Stroop                          |

|     |     |          |               |       |                        |                                |
|-----|-----|----------|---------------|-------|------------------------|--------------------------------|
| 232 | 262 | 17188464 | Schizophrenia | MRI   | Conflict Monitoring    | Stroop                         |
| 233 | 263 | 24405183 | Anxiety       | SPECT | Set Shifting           | Wisconsin Card Sorting Task    |
| 234 | 264 | 19346000 | Unipolar      | MRI   | Recognition Memory     | Recognition                    |
| 235 | 265 | 21211946 | Schizophrenia | MRI   | Working Memory         | Sternberg Working Memory Task  |
| 236 | 266 | 20731964 | Schizophrenia | MRI   | Set Shifting           | Wisconsin Card Sorting Task    |
| 237 | 267 | 9665622  | Schizophrenia | PET   | Recognition Memory     | Recognition                    |
| 238 | 268 | 24478729 | Schizophrenia | MRI   | Working Memory         | N-back                         |
| 239 | 269 | 22355285 | Schizophrenia | MRI   | Recognition Memory     | Recognition                    |
| 240 | 270 | 19179050 | Schizophrenia | MRI   | Response Selection     | Choice Reaction Time Task      |
| 241 | 271 | 18174505 | Anxiety       | MRI   | Conflict Monitoring    | Stroop                         |
| 241 | 272 | 18174505 | Anxiety       | MRI   | Set Shifting           | Switch Task                    |
| 241 | 273 | 18174505 | Anxiety       | MRI   | Response Inhibition    | Go/No-Go                       |
| 242 | 274 | 12151286 | Schizophrenia | MRI   | Working Memory         | N-back                         |
| 243 | 275 | 24491458 | Substance Use | MRI   | Response Selection     | Modified Iowa Gambling Task    |
| 244 | 276 | 19218875 | Unipolar      | MRI   | Response Inhibition    | Stop Signal Task               |
| 245 | 277 | 15804721 | Schizophrenia | MRI   | Working Memory         | N-back                         |
| 246 | 278 | 18519527 | Schizophrenia | MRI   | Performance Monitoring | Continuous Performance Task    |
| 247 | 279 | 24895735 | Bipolar       | MRI   | Verbal Fluency         | Verbal Fluency                 |
| 248 | 280 | 17679639 | Anxiety       | MRI   | Conflict Monitoring    | Multi-Source Interference Task |
| 249 | 281 | 17245325 | Substance Use | MRI   | Conflict Monitoring    | Multi-Source Interference Task |

|     |     |          |               |     |                       |                                 |
|-----|-----|----------|---------------|-----|-----------------------|---------------------------------|
| 250 | 282 | 16945506 | Schizophrenia | MRI | Other                 | Serial<br>Reaction<br>Time Task |
| 251 | 283 | 20702070 | Schizophrenia | MRI | Recognition<br>Memory | Recognition                     |

Ref=Reference number; Schizophrenia=schizophrenia, schizoaffective, schizophreniform, and delusional disorders; Bipolar=bipolar disorders; Unipolar= major depression, dysthymia; Anxiety=obsessive compulsive disorder, posttraumatic stress disorder, social anxiety disorder, Substance Use=mixed substance abuse and/or dependence).

#### Studies Included In Meta-analysis

1. Achim AM, Bertrand MC, Sutton H, Montoya A, Czechowska Y, Malla AK, et al. Selective abnormal modulation of hippocampal activity during memory formation in first-episode psychosis. *Arch Gen Psychiatry*. 2007;64(9):999-1014.
2. Adler CM, Holland SK, Schmithorst V, Tuchfarber MJ, Strakowski SM. Changes in neuronal activation in patients with bipolar disorder during performance of a working memory task. *Bipolar Disord*. 2004;6(6):540-9.
3. Allin MP, Marshall N, Schulze K, Walshe M, Hall MH, Picchioni M, et al. A functional MRI study of verbal fluency in adults with bipolar disorder and their unaffected relatives. *Psychol Med*. 2010;40(12):2025-35.
4. Andreasen NC, O'Leary DS, Cizadlo T, Arndt S, Rezai K, Ponto LL, et al. Schizophrenia and cognitive dysmetria: a positron-emission tomography study of dysfunctional prefrontal-thalamic-cerebellar circuitry. *Proc Natl Acad Sci U S A*. 1996;93(18):9985-90.
5. Anticevic A, Repovs G, Barch DM. Working memory encoding and maintenance deficits in schizophrenia: neural evidence for activation and deactivation abnormalities. *Schizophr Bull*. 2013;39(1):168-78.
6. Assaf M, Rivkin PR, Kuzu CH, Calhoun VD, Kraut MA, Groth KM, et al. Abnormal object recall and anterior cingulate overactivation correlate with formal thought disorder in schizophrenia. *Biol Psychiatry*. 2006;59(5):452-9.
7. Astur RS, St Germain SA, Tolin D, Ford J, Russell D, Stevens M. Hippocampus function predicts severity of post-traumatic stress disorder. *Cyberpsychol Behav*. 2006;9(2):234-40.
8. Avery SN, Williams LE, Woolard AA, Heckers S. Relational memory and hippocampal function in psychotic bipolar disorder. *Eur Arch Psychiatry Clin Neurosci*. 2013.
9. Avsar KB, Stoeckel LE, Bolding MS, White DM, Tagamets MA, Holcomb HH, et al. Aberrant visual circuitry associated with normal spatial match-to-sample accuracy in schizophrenia. *Psychiatry Res*. 2011;193(3):138-43.
10. Avsar KB, Weller RE, Cox JE, Reid MA, White DM, Lahti AC. An fMRI investigation of delay discounting in patients with schizophrenia. *Brain Behav*. 2013;3(4):384-401.
11. Callicott JH, Mattay VS, Verchinski BA, Marenco S, Egan MF, Weinberger DR. Complexity of prefrontal cortical dysfunction in schizophrenia: more than up or down. *Am J Psychiatry*. 2003;160(12):2209-15.
12. Bach P, Vollstadt-Klein S, Frischknecht U, Hoerst M, Kiefer F, Mann K, et al. Diminished brain functional magnetic resonance imaging activation in patients on opiate



maintenance despite normal spatial working memory task performance. *Clin Neuropharmacol.* 2012;35(4):153-60.

13. Backes H, Dietsche B, Nagels A, Stratmann M, Konrad C, Kircher T, et al. Increased neural activity during overt and continuous semantic verbal fluency in major depression: mainly a failure to deactivate. *Eur Arch Psychiatry Clin Neurosci.* 2014;264(7):631-45.
14. Bagga D, Singh N, Modi S, Kumar P, Bhattacharya D, Garg ML, et al. Assessment of lexical semantic judgment abilities in alcohol-dependent subjects: an fMRI study. *J Biosci.* 2013;38(5):905-15.
15. Banich MT, Crowley TJ, Thompson LL, Jacobson BL, Liu X, Raymond KM, et al. Brain activation during the Stroop task in adolescents with severe substance and conduct problems: A pilot study. *Drug Alcohol Depend.* 2007;90(2-3):175-82.
16. Barch DM, Csernansky JG, Conturo T, Snyder AZ. Working and long-term memory deficits in schizophrenia: is there a common prefrontal mechanism? *J Abnorm Psychol.* 2002;111(3):478-94.
17. Barch DM, Sheline YI, Csernansky JG, Snyder AZ. Working memory and prefrontal cortex dysfunction: specificity to schizophrenia compared with major depression. *Biol Psychiatry.* 2003;53(5):376-84.
18. Bertolino A, Caforio G, Petruzzella V, Latorre V, Rubino V, Dimalta S, et al. Prefrontal dysfunction in schizophrenia controlling for COMT Val158Met genotype and working memory performance. *Psychiatry Res.* 2006;147(2-3):221-6.
19. Bittner RA, Linden DE, Roebroek A, Hartling F, Rotarska-Jagiela A, Maurer K, et al. The When and Where of Working Memory Dysfunction in Early-Onset Schizophrenia-A Functional Magnetic Resonance Imaging Study. *Cereb Cortex.* 2015;25(9):2494-506.
20. Blumberg HP, Leung HC, Skudlarski P, Lacadie CM, Fredericks CA, Harris BC, et al. A functional magnetic resonance imaging study of bipolar disorder: state- and trait-related dysfunction in ventral prefrontal cortices. *Arch Gen Psychiatry.* 2003;60(6):601-9.
21. Bobb DS, Jr., Adinoff B, Laken SJ, McClintock SM, Rubia K, Huang HW, et al. Neural correlates of successful response inhibition in unmedicated patients with late-life depression. *Am J Geriatr Psychiatry.* 2012;20(12):1057-69.
22. Bolla KI, Eldreth DA, London ED, Kiehl KA, Mouratidis M, Contoreggi C, et al. Orbitofrontal cortex dysfunction in abstinent cocaine abusers performing a decision-making task. *Neuroimage.* 2003;19(3):1085-94.
23. Bor J, Brunelin J, Sappey-Mariniere D, Ibarrola D, d'Amato T, Suaud-Chagny MF, et al. Thalamus abnormalities during working memory in schizophrenia. An fMRI study. *Schizophr Res.* 2011;125(1):49-53.
24. Brooks JO, 3rd, Vizueta N, Penfold C, Townsend JD, Bookheimer SY, Altshuler LL. Prefrontal hypoactivation during working memory in bipolar II depression. *Psychol Med.* 2015;45(8):1731-40.
25. Broome MR, Matthiasson P, Fusar-Poli P, Woolley JB, Johns LC, Tabraham P, et al. Neural correlates of executive function and working memory in the 'at-risk mental state'. *Br J Psychiatry.* 2009;194(1):25-33.
26. Brown A, Biederman J, Valera E, Lomedico A, Aleardi M, Makris N, et al. Working memory network alterations and associated symptoms in adults with ADHD and Bipolar Disorder. *J Psychiatr Res.* 2012;46(4):476-83.
27. Callicott JH, Bertolino A, Mattay VS, Langheim FJ, Duyn J, Coppola R, et al. Physiological dysfunction of the dorsolateral prefrontal cortex in schizophrenia revisited. *Cereb Cortex.* 2000;10(11):1078-92.

28. Carter CS, Mintun M, Nichols T, Cohen JD. Anterior cingulate gyrus dysfunction and selective attention deficits in schizophrenia: [15O]H<sub>2</sub>O PET study during single-trial Stroop task performance. *Am J Psychiatry*. 1997;154(12):1670-5.
29. Cerullo MA, Adler CM, Lamy M, Eliassen JC, Fleck DE, Strakowski SM, et al. Differential brain activation during response inhibition in bipolar and attention-deficit hyperactivity disorders. *Early Interv Psychiatry*. 2009;3(3):189-97.
30. Chakirova G, Whalley HC, Thomson PA, Hennah W, Moorhead TW, Welch KA, et al. The effects of DISC1 risk variants on brain activation in controls, patients with bipolar disorder and patients with schizophrenia. *Psychiatry Res*. 2011;192(1):20-8.
31. Chen S, Li L, Xu B, Liu J. Insular cortex involvement in declarative memory deficits in patients with post-traumatic stress disorder. *BMC Psychiatry*. 2009;9:39.
32. Chang K, Adleman NE, Dienes K, Simeonova DI, Menon V, Reiss A. Anomalous prefrontal-subcortical activation in familial pediatric bipolar disorder: a functional magnetic resonance imaging investigation. *Arch Gen Psychiatry*. 2004;61(8):781-92.
33. Choi JW, Jeong BS, Kim JW. Dysfunction of the Left Dorsolateral Prefrontal Cortex is Primarily Responsible for Impaired Attentional Processing in Schizophrenia. *Psychiatry Investig*. 2008;5(1):52-9.
34. Crespo-Facorro B, Paradiso S, Andreasen NC, O'Leary DS, Watkins GL, Boles Ponto LL, et al. Recalling word lists reveals "cognitive dysmetria" in schizophrenia: a positron emission tomography study. *Am J Psychiatry*. 1999;156(3):386-92.
35. Crespo-Facorro B, Wiser AK, Andreasen NC, O'Leary DS, Watkins GL, Boles Ponto LL, et al. Neural basis of novel and well-learned recognition memory in schizophrenia: a positron emission tomography study. *Hum Brain Mapp*. 2001;12(4):219-31.
36. Cuervo-Lombard C, Lemogne C, Gierski F, Bera-Potelle C, Tran E, Portefaix C, et al. Neural basis of autobiographical memory retrieval in schizophrenia. *Br J Psychiatry*. 2012;201(6):473-80.
37. Curtis VA, Bullmore ET, Brammer MJ, Wright IC, Williams SC, Morris RG, et al. Attenuated frontal activation during a verbal fluency task in patients with schizophrenia. *Am J Psychiatry*. 1998;155(8):1056-63.
38. Curtis VA, Bullmore ET, Morris RG, Brammer MJ, Williams SC, Simmons A, et al. Attenuated frontal activation in schizophrenia may be task dependent. *Schizophr Res*. 1999;37(1):35-44.
39. Curtis VA, Dixon TA, Morris RG, Bullmore ET, Brammer MJ, Williams SC, et al. Differential frontal activation in schizophrenia and bipolar illness during verbal fluency. *J Affect Disord*. 2001;66(2-3):111-21.
40. Curtis VA, Thompson JM, Seal ML, Monks PJ, Lloyd AJ, Harrison L, et al. The nature of abnormal language processing in euthymic bipolar I disorder: evidence for a relationship between task demand and prefrontal function. *Bipolar Disord*. 2007;9(4):358-69.
41. Dager AD, Jamadar S, Stevens MC, Rosen R, Jiantonio-Kelly RE, Sisante JF, et al. fMRI response during figural memory task performance in college drinkers. *Psychopharmacology (Berl)*. 2014;231(1):167-79.
42. Daumann J, Schnitker R, Weidemann J, Schnell K, Thron A, Gouzoulis-Mayfrank E. Neural correlates of working memory in pure and polyvalent ecstasy (MDMA) users. *Neuroreport*. 2003;14(15):1983-7.
43. Dehaene S, Artiges E, Naccache L, Martelli C, Viard A, Schurhoff F, et al. Conscious and subliminal conflicts in normal subjects and patients with schizophrenia: the role of the anterior cingulate. *Proc Natl Acad Sci U S A*. 2003;100(23):13722-7.

44. Desmond JE, Chen SH, DeRosa E, Pryor MR, Pfefferbaum A, Sullivan EV. Increased frontocerebellar activation in alcoholics during verbal working memory: an fMRI study. *Neuroimage*. 2003;19(4):1510-20.
45. Dietsche B, Backes H, Stratmann M, Konrad C, Kircher T, Krug A. Altered neural function during episodic memory encoding and retrieval in major depression. *Hum Brain Mapp*. 2014;35(9):4293-302.
46. Diler RS, Segreti AM, Ladouceur CD, Almeida JR, Birmaher B, Axelson DA, et al. Neural correlates of treatment in adolescents with bipolar depression during response inhibition. *J Child Adolesc Psychopharmacol*. 2013;23(3):214-21.
47. Drapier D, Surguladze S, Marshall N, Schulze K, Fern A, Hall MH, et al. Genetic liability for bipolar disorder is characterized by excess frontal activation in response to a working memory task. *Biol Psychiatry*. 2008;64(6):513-20.
48. Dumas JA, Newhouse PA. Impaired working memory in geriatric depression: an FMRI study. *Am J Geriatr Psychiatry*. 2015;23(4):433-6.
49. Eich TS, Nee DE, Insel C, Malapani C, Smith EE. Neural correlates of impaired cognitive control over working memory in schizophrenia. *Biol Psychiatry*. 2014;76(2):146-53.
50. Eldreth DA, Matochik JA, Cadet JL, Bolla KI. Abnormal brain activity in prefrontal brain regions in abstinent marijuana users. *Neuroimage*. 2004;23(3):914-20.
51. Elzinga BM, Ardon AM, Heijnis MK, De Ruiter MB, Van Dyck R, Veltman DJ. Neural correlates of enhanced working-memory performance in dissociative disorder: a functional MRI study. *Psychol Med*. 2007;37(2):235-45.
52. Ettinger U, Williams SC, Fannon D, Premkumar P, Kuipers E, Moller HJ, et al. Functional magnetic resonance imaging of a parametric working memory task in schizophrenia: relationship with performance and effects of antipsychotic treatment. *Psychopharmacology (Berl)*. 2011;216(1):17-27.
53. Falconer E, Bryant R, Felmingham KL, Kemp AH, Gordon E, Peduto A, et al. The neural networks of inhibitory control in posttraumatic stress disorder. *J Psychiatry Neurosci*. 2008;33(5):413-22.
54. Fassbender C, Scangos K, Lesh TA, Carter CS. RT distributional analysis of cognitive-control-related brain activity in first-episode schizophrenia. *Cogn Affect Behav Neurosci*. 2014;14(1):175-88.
55. Fernandez-Corcuera P, Salvador R, Monte GC, Salvador Sarro S, Goikolea JM, Amann B, et al. Bipolar depressed patients show both failure to activate and failure to deactivate during performance of a working memory task. *J Affect Disord*. 2013;148(2-3):170-8.
56. Fitzgerald KD, Welsh RC, Gehring WJ, Abelson JL, Himle JA, Liberzon I, et al. Error-related hyperactivity of the anterior cingulate cortex in obsessive-compulsive disorder. *Biol Psychiatry*. 2005;57(3):287-94.
57. Fitzgerald PB, Sriithiran A, Benitez J, Daskalakis ZZ, Oxley TJ, Kulkarni J, et al. An fMRI study of prefrontal brain activation during multiple tasks in patients with major depressive disorder. *Hum Brain Mapp*. 2008;29(4):490-501.
58. Fleck DE, Kotwal R, Eliassen JC, Lamy M, Delbello MP, Adler CM, et al. Preliminary evidence for increased frontosubcortical activation on a motor impulsivity task in mixed episode bipolar disorder. *J Affect Disord*. 2011;133(1-2):333-9.
59. Francis MM, Hummer TA, Vohs JL, Yung MG, Liffick E, Mehdiyoun NF, et al. Functional neuroanatomical correlates of episodic memory impairment in early phase psychosis. *Brain Imaging Behav*. 2016;10(1):1-11.

60. Frangou S. Brain structural and functional correlates of resilience to Bipolar Disorder. *Front Hum Neurosci.* 2011;5:184.
61. Fu LP, Bi GH, Zou ZT, Wang Y, Ye EM, Ma L, et al. Impaired response inhibition function in abstinent heroin dependents: an fMRI study. *Neurosci Lett.* 2008;438(3):322-6.
62. Ganguli R, Carter C, Mintun M, Brar J, Becker J, Sarma R, et al. PET brain mapping study of auditory verbal supraspan memory versus visual fixation in schizophrenia. *Biol Psychiatry.* 1997;41(1):33-42.
63. Genzel L, Dresler M, Cornu M, Jager E, Konrad B, Adamczyk M, et al. Medial prefrontal-hippocampal connectivity and motor memory consolidation in depression and schizophrenia. *Biol Psychiatry.* 2015;77(2):177-86.
64. Glahn DC, Robinson JL, Tordesillas-Gutierrez D, Monkul ES, Holmes MK, Green MJ, et al. Fronto-temporal dysregulation in asymptomatic bipolar I patients: a paired associate functional MRI study. *Hum Brain Mapp.* 2010;31(7):1041-51.
65. Gu BM, Park JY, Kang DH, Lee SJ, Yoo SY, Jo HJ, et al. Neural correlates of cognitive inflexibility during task-switching in obsessive-compulsive disorder. *Brain.* 2008;131(Pt 1):155-64.
66. Guerrero-Pedraza A, McKenna PJ, Gomar JJ, Sarro S, Salvador R, Amann B, et al. First-episode psychosis is characterized by failure of deactivation but not by hypo- or hyperfrontality. *Psychol Med.* 2012;42(1):73-84.
67. Halari R, Simic M, Pariante CM, Papadopoulos A, Cleare A, Brammer M, et al. Reduced activation in lateral prefrontal cortex and anterior cingulate during attention and cognitive control functions in medication-naive adolescents with depression compared to controls. *J Child Psychol Psychiatry.* 2009;50(3):307-16.
68. Hall J, Whalley HC, Marwick K, McKirdy J, Sussmann J, Romaniuk L, et al. Hippocampal function in schizophrenia and bipolar disorder. *Psychol Med.* 2010;40(5):761-70.
69. Hamilton LS, Altshuler LL, Townsend J, Bookheimer SY, Phillips OR, Fischer J, et al. Alterations in functional activation in euthymic bipolar disorder and schizophrenia during a working memory task. *Hum Brain Mapp.* 2009;30(12):3958-69.
70. Harle KM, Shenoy P, Stewart JL, Tapert SF, Yu AJ, Paulus MP. Altered neural processing of the need to stop in young adults at risk for stimulant dependence. *J Neurosci.* 2014;34(13):4567-80.
71. Harrison BJ, Yucel M, Pujol J, Pantelis C. Task-induced deactivation of midline cortical regions in schizophrenia assessed with fMRI. *Schizophr Res.* 2007;91(1-3):82-6.
72. Harrison BJ, Yucel M, Fornito A, Wood SJ, Seal ML, Clarke K, et al. Characterizing anterior cingulate activation in chronic schizophrenia: a group and single-subject fMRI study. *Acta Psychiatr Scand.* 2007;116(4):271-9.
73. Harvey PO, Fossati P, Pochon JB, Levy R, Lebastard G, Lehericy S, et al. Cognitive control and brain resources in major depression: an fMRI study using the n-back task. *Neuroimage.* 2005;26(3):860-9.
74. Hawco C, Buchy L, Bodnar M, Izadi S, Dell'Elce J, Messina K, et al. Source retrieval is not properly differentiated from object retrieval in early schizophrenia: an fMRI study using virtual reality. *Neuroimage Clin.* 2015;7:336-46.
75. Heckers S, Rauch SL, Goff D, Savage CR, Schacter DL, Fischman AJ, et al. Impaired recruitment of the hippocampus during conscious recollection in schizophrenia. *Nat Neurosci.* 1998;1(4):318-23.
76. Heinze S, Sartory G, Muller BW, de Greiff A, Forsting M, Juptner M. Neural activation during successful and unsuccessful verbal learning in schizophrenia. *Schizophr Res.* 2006;83(2-3):121-30.

77. Henseler I, Gruber O, Kraft S, Krick C, Reith W, Falkai P. Compensatory hyperactivations as markers of latent working memory dysfunctions in patients with obsessive-compulsive disorder: an fMRI study. *J Psychiatry Neurosci*. 2008;33(3):209-15.
78. Henseler I, Falkai P, Gruber O. A systematic fMRI investigation of the brain systems subserving different working memory components in schizophrenia. *Eur J Neurosci*. 2009;30(4):693-702.
79. Hester R, Garavan H. Executive dysfunction in cocaine addiction: evidence for discordant frontal, cingulate, and cerebellar activity. *J Neurosci*. 2004;24(49):11017-22.
80. Hofer A, Weiss EM, Golaszewski SM, Siedentopf CM, Brinkhoff C, Kremser C, et al. An FMRI study of episodic encoding and recognition of words in patients with schizophrenia in remission. *Am J Psychiatry*. 2003;160(5):911-8.
81. Hofer A, Weiss EM, Golaszewski SM, Siedentopf CM, Brinkhoff C, Kremser C, et al. Neural correlates of episodic encoding and recognition of words in unmedicated patients during an acute episode of schizophrenia: a functional MRI study. *Am J Psychiatry*. 2003;160(10):1802-8.
82. Honey GD, Sharma T, Suckling J, Giampietro V, Soni W, Williams SC, et al. The functional neuroanatomy of schizophrenic subsyndromes. *Psychol Med*. 2003;33(6):1007-18.
83. Hugdahl K, Rund BR, Lund A, Asbjornsen A, Egeland J, Erslund L, et al. Brain activation measured with fMRI during a mental arithmetic task in schizophrenia and major depression. *Am J Psychiatry*. 2004;161(2):286-93.
84. Jamadar S, Michie P, Karayanidis F. Compensatory mechanisms underlie intact task-switching performance in schizophrenia. *Neuropsychologia*. 2010;48(5):1305-23.
85. Jamadar S, O'Neil KM, Pearlson GD, Ansari M, Gill A, Jagannathan K, et al. Impairment in semantic retrieval is associated with symptoms in schizophrenia but not bipolar disorder. *Biol Psychiatry*. 2013;73(6):555-64.
86. Seok Jeong B, Kwon JS, Yoon Kim S, Lee C, Youn T, Moon CH, et al. Functional imaging evidence of the relationship between recurrent psychotic episodes and neurodegenerative course in schizophrenia. *Psychiatry Res*. 2005;139(3):219-28.
87. Jogia J, Dima D, Kumari V, Frangou S. Frontopolar cortical inefficiency may underpin reward and working memory dysfunction in bipolar disorder. *World J Biol Psychiatry*. 2012;13(8):605-15.
88. John JP, Halahalli HN, Vasudev MK, Jayakumar PN, Jain S. Regional brain activation/deactivation during word generation in schizophrenia: fMRI study. *Br J Psychiatry*. 2011;198(3):213-22.
89. Johnson MR, Morris NA, Astur RS, Calhoun VD, Mathalon DH, Kiehl KA, et al. A functional magnetic resonance imaging study of working memory abnormalities in schizophrenia. *Biol Psychiatry*. 2006;60(1):11-21.
90. Jones HM, Brammer MJ, O'Toole M, Taylor T, Ohlsen RI, Brown RG, et al. Cortical effects of quetiapine in first-episode schizophrenia: a preliminary functional magnetic resonance imaging study. *Biol Psychiatry*. 2004;56(12):938-42.
91. Joyal CC, Putkonen A, Mancini-Marie A, Hodgins S, Kononen M, Boulay L, et al. Violent persons with schizophrenia and comorbid disorders: a functional magnetic resonance imaging study. *Schizophr Res*. 2007;91(1-3):97-102.
92. Kaladjian A, Jeanningros R, Azorin JM, Grimault S, Anton JL, Mazzola-Pomietto P. Blunted activation in right ventrolateral prefrontal cortex during motor response inhibition in schizophrenia. *Schizophr Res*. 2007;97(1-3):184-93.

93. Kaladjian A, Jeanningros R, Azorin JM, Nazarian B, Roth M, Anton JL, et al. Remission from mania is associated with a decrease in amygdala activation during motor response inhibition. *Bipolar Disord*. 2009;11(5):530-8.
94. Kaladjian A, Jeanningros R, Azorin JM, Nazarian B, Roth M, Mazzola-Pomietto P. Reduced brain activation in euthymic bipolar patients during response inhibition: an event-related fMRI study. *Psychiatry Res*. 2009;173(1):45-51.
95. Kanayama G, Rogowska J, Pope HG, Gruber SA, Yurgelun-Todd DA. Spatial working memory in heavy cannabis users: a functional magnetic resonance imaging study. *Psychopharmacology (Berl)*. 2004;176(3-4):239-47.
96. Kang SS, Sponheim SR, Chafee MV, MacDonald AW, 3rd. Disrupted functional connectivity for controlled visual processing as a basis for impaired spatial working memory in schizophrenia. *Neuropsychologia*. 2011;49(10):2836-47.
97. Kang DH, Jang JH, Han JY, Kim JH, Jung WH, Choi JS, et al. Neural correlates of altered response inhibition and dysfunctional connectivity at rest in obsessive-compulsive disorder. *Prog Neuropsychopharmacol Biol Psychiatry*. 2013;40:340-6.
98. Karch S, Leicht G, Giegling I, Lutz J, Kunz J, Buselmeier M, et al. Inefficient neural activity in patients with schizophrenia and nonpsychotic relatives of schizophrenic patients: evidence from a working memory task. *J Psychiatr Res*. 2009;43(15):1185-94.
99. Kerns JG, Cohen JD, MacDonald AW, 3rd, Johnson MK, Stenger VA, Aizenstein H, et al. Decreased conflict- and error-related activity in the anterior cingulate cortex in subjects with schizophrenia. *Am J Psychiatry*. 2005;162(10):1833-9.
100. Kim P, Jenkins SE, Connolly ME, Deveney CM, Fromm SJ, Brotman MA, et al. Neural correlates of cognitive flexibility in children at risk for bipolar disorder. *J Psychiatr Res*. 2012;46(1):22-30.
101. Kimbrell TA, Ketter TA, George MS, Little JT, Benson BE, Willis MW, et al. Regional cerebral glucose utilization in patients with a range of severities of unipolar depression. *Biol Psychiatry*. 2002;51(3):237-52.
102. Kircher TT, Bulimore ET, Brammer MJ, Williams SC, Broome MR, Murray RM, et al. Differential activation of temporal cortex during sentence completion in schizophrenic patients with and without formal thought disorder. *Schizophr Res*. 2001;50(1-2):27-40.
103. Kircher T, Whitney C, Krings T, Huber W, Weis S. Hippocampal dysfunction during free word association in male patients with schizophrenia. *Schizophr Res*. 2008;101(1-3):242-55.
104. Kober H, DeVito EE, DeLeone CM, Carroll KM, Potenza MN. Cannabis abstinence during treatment and one-year follow-up: relationship to neural activity in men. *Neuropsychopharmacology*. 2014;39(10):2288-98.
105. Koch K, Wagner G, Nenadic I, Schachtzabel C, Schultz C, Roebel M, et al. Frontostriatal hypoactivation during correct information retrieval in patients with schizophrenia: an fMRI study. *Neuroscience*. 2008;153(1):54-62.
106. Koch K, Wagner G, Schachtzabel C, Peikert G, Schultz CC, Sauer H, et al. Aberrant anterior cingulate activation in obsessive-compulsive disorder is related to task complexity. *Neuropsychologia*. 2012;50(5):958-64.
107. Kronhaus DM, Lawrence NS, Williams AM, Frangou S, Brammer MJ, Williams SC, et al. Stroop performance in bipolar disorder: further evidence for abnormalities in the ventral prefrontal cortex. *Bipolar Disord*. 2006;8(1):28-39.
108. Krug A, Cabanis M, Pyka M, Pauly K, Kellermann T, Walter H, et al. Attenuated prefrontal activation during decision-making under uncertainty in schizophrenia: a multi-center fMRI study. *Schizophr Res*. 2014;152(1):176-83.

109. Kyriakopoulos M, Dima D, Roiser JP, Corrigall R, Barker GJ, Frangou S. Abnormal functional activation and connectivity in the working memory network in early-onset schizophrenia. *J Am Acad Child Adolesc Psychiatry*. 2012;51(9):911-20 e2.
110. Kubicki M, McCarley RW, Nestor PG, Huh T, Kikinis R, Shenton ME, et al. An fMRI study of semantic processing in men with schizophrenia. *Neuroimage*. 2003;20(4):1923-33.
111. Kuperberg GR, West WC, Lakshmanan BM, Goff D. Functional magnetic resonance imaging reveals neuroanatomical dissociations during semantic integration in schizophrenia. *Biol Psychiatry*. 2008;64(5):407-18.
112. Lagopoulos J, Ivanovski B, Malhi GS. An event-related functional MRI study of working memory in euthymic bipolar disorder. *J Psychiatry Neurosci*. 2007;32(3):174-84.
113. Landin-Romero R, McKenna PJ, Salgado-Pineda P, Sarro S, Aguirre C, Sarri C, et al. Failure of deactivation in the default mode network: a trait marker for schizophrenia? *Psychol Med*. 2015;45(6):1315-25.
114. Langenecker SA, Kennedy SE, Guidotti LM, Briceno EM, Own LS, Hooven T, et al. Frontal and limbic activation during inhibitory control predicts treatment response in major depressive disorder. *Biol Psychiatry*. 2007;62(11):1272-80.
115. Laurens KR, Ngan ET, Bates AT, Kiehl KA, Liddle PF. Rostral anterior cingulate cortex dysfunction during error processing in schizophrenia. *Brain*. 2003;126(Pt 3):610-22.
116. Lepage M, Pelletier M, Achim A, Montoya A, Menear M, Lal S. Parietal cortex and episodic memory retrieval in schizophrenia. *Psychiatry Res*. 2010;182(3):191-9.
117. Lesh TA, Westphal AJ, Niendam TA, Yoon JH, Minzenberg MJ, Ragland JD, et al. Proactive and reactive cognitive control and dorsolateral prefrontal cortex dysfunction in first episode schizophrenia. *Neuroimage Clin*. 2013;2:590-9.
118. Lesh TA, Tanase C, Geib BR, Niendam TA, Yoon JH, Minzenberg MJ, et al. A multimodal analysis of antipsychotic effects on brain structure and function in first-episode schizophrenia. *JAMA Psychiatry*. 2015;72(3):226-34.
119. Leube DT, Rapp A, Buchkremer G, Bartels M, Kircher TT, Erb M, et al. Hippocampal dysfunction during episodic memory encoding in patients with schizophrenia-an fMRI study. *Schizophr Res*. 2003;64(1):83-5.
120. Li CS, Huang C, Yan P, Bhagwagar Z, Milivojevic V, Sinha R. Neural correlates of impulse control during stop signal inhibition in cocaine-dependent men. *Neuropsychopharmacology*. 2008;33(8):1798-806.
121. Li CS, Luo X, Yan P, Bergquist K, Sinha R. Altered impulse control in alcohol dependence: neural measures of stop signal performance. *Alcohol Clin Exp Res*. 2009;33(4):740-50.
122. Liemburg EJ, Dlabac-De Lange JJ, Bais L, Knegtering H, van Osch MJ, Renken RJ, et al. Neural correlates of planning performance in patients with schizophrenia--relationship with apathy. *Schizophr Res*. 2015;161(2-3):367-75.
123. Luck D, Danion JM, Marrer C, Pham BT, Gounot D, Foucher J. Abnormal medial temporal activity for bound information during working memory maintenance in patients with schizophrenia. *Hippocampus*. 2010;20(8):936-48.
124. Madre M, Pomarol-Clotet E, McKenna P, Radua J, Ortiz-Gil J, Panicali F, et al. Brain functional abnormality in schizo-affective disorder: an fMRI study. *Psychol Med*. 2013;43(1):143-53.
125. Madre M, Radua J, Landin-Romero R, Alonso-Lana S, Salvador R, Panicali F, et al. Trait or state? A longitudinal neuropsychological evaluation and fMRI study in schizoaffective disorder. *Schizophr Res*. 2014;159(2-3):458-64.

126. Maltby N, Tolin DF, Worhunsky P, O'Keefe TM, Kiehl KA. Dysfunctional action monitoring hyperactivates frontal-striatal circuits in obsessive-compulsive disorder: an event-related fMRI study. *Neuroimage*. 2005;24(2):495-503.
127. Marsh R, Horga G, Parashar N, Wang Z, Peterson BS, Simpson HB. Altered activation in fronto-striatal circuits during sequential processing of conflict in unmedicated adults with obsessive-compulsive disorder. *Biol Psychiatry*. 2014;75(8):615-22.
128. Matsuo K, Glahn DC, Peluso MA, Hatch JP, Monkul ES, Najt P, et al. Prefrontal hyperactivation during working memory task in untreated individuals with major depressive disorder. *Mol Psychiatry*. 2007;12(2):158-66.
129. Matsuo K, Chen SH, Liu CM, Liu CC, Hwang TJ, Hsieh MH, et al. Stable signatures of schizophrenia in the cortical-subcortical-cerebellar network using fMRI of verbal working memory. *Schizophr Res*. 2013;151(1-3):133-40.
130. Matthews S, Simmons A, Strigo I, Gianaros P, Yang T, Paulus M. Inhibition-related activity in subgenual cingulate is associated with symptom severity in major depression. *Psychiatry Res*. 2009;172(1):1-6.
131. Mazzola-Pomietto P, Kaladjian A, Azorin JM, Anton JL, Jeanningros R. Bilateral decrease in ventrolateral prefrontal cortex activation during motor response inhibition in mania. *J Psychiatr Res*. 2009;43(4):432-41.
132. McDowell JE, Brown GG, Paulus M, Martinez A, Stewart SE, Dubowitz DJ, et al. Neural correlates of refixation saccades and antisaccades in normal and schizophrenia subjects. *Biol Psychiatry*. 2002;51(3):216-23.
133. McIntosh AM, Whalley HC, McKirdy J, Hall J, Sussmann JE, Shankar P, et al. Prefrontal function and activation in bipolar disorder and schizophrenia. *Am J Psychiatry*. 2008;165(3):378-84.
134. McKenna BS, Sutherland AN, Legenkaya AP, Eyster LT. Abnormalities of brain response during encoding into verbal working memory among euthymic patients with bipolar disorder. *Bipolar Disord*. 2014;16(3):289-99.
135. Meisenzahl EM, Scheuerecker J, Zipse M, Ufer S, Wiesmann M, Frodl T, et al. Effects of treatment with the atypical neuroleptic quetiapine on working memory function: a functional MRI follow-up investigation. *Eur Arch Psychiatry Clin Neurosci*. 2006;256(8):522-31.
136. Mendrek A, Kiehl KA, Smith AM, Irwin D, Forster BB, Liddle PF. Dysfunction of a distributed neural circuitry in schizophrenia patients during a working-memory performance. *Psychol Med*. 2005;35(2):187-96.
137. Meyer-Lindenberg A, Poline JB, Kohn PD, Holt JL, Egan MF, Weinberger DR, et al. Evidence for abnormal cortical functional connectivity during working memory in schizophrenia. *Am J Psychiatry*. 2001;158(11):1809-17.
138. Moeller FG, Steinberg JL, Dougherty DM, Narayana PA, Kramer LA, Renshaw PF. Functional MRI study of working memory in MDMA users. *Psychopharmacology (Berl)*. 2004;177(1-2):185-94.
139. Moeller FG, Steinberg JL, Schmitz JM, Ma L, Liu S, Kjome KL, et al. Working memory fMRI activation in cocaine-dependent subjects: association with treatment response. *Psychiatry Res*. 2010;181(3):174-82.
140. Moeller SJ, Konova AB, Parvaz MA, Tomasi D, Lane RD, Fort C, et al. Functional, structural, and emotional correlates of impaired insight in cocaine addiction. *JAMA Psychiatry*. 2014;71(1):61-70.
141. Monks PJ, Thompson JM, Bullmore ET, Suckling J, Brammer MJ, Williams SC, et al. A functional MRI study of working memory task in euthymic bipolar disorder: evidence for task-specific dysfunction. *Bipolar Disord*. 2004;6(6):550-64.



142. Morein-Zamir S, Simon Jones P, Bullmore ET, Robbins TW, Ersche KD. Prefrontal hypoactivity associated with impaired inhibition in stimulant-dependent individuals but evidence for hyperactivation in their unaffected siblings. *Neuropsychopharmacology*. 2013;38(10):1945-53.
143. Nabeyama M, Nakagawa A, Yoshiura T, Nakao T, Nakatani E, Togao O, et al. Functional MRI study of brain activation alterations in patients with obsessive-compulsive disorder after symptom improvement. *Psychiatry Res*. 2008;163(3):236-47.
144. Naismith SL, Lagopoulos J, Ward PB, Davey CG, Little C, Hickie IB. Fronto-striatal correlates of impaired implicit sequence learning in major depression: an fMRI study. *J Affect Disord*. 2010;125(1-3):256-61.
145. Nakao T, Nakagawa A, Yoshiura T, Nakatani E, Nabeyama M, Yoshizato C, et al. A functional MRI comparison of patients with obsessive-compulsive disorder and normal controls during a Chinese character Stroop task. *Psychiatry Res*. 2005;139(2):101-14.
146. Nakao T, Nakagawa A, Nakatani E, Nabeyama M, Sanematsu H, Yoshiura T, et al. Working memory dysfunction in obsessive-compulsive disorder: a neuropsychological and functional MRI study. *J Psychiatr Res*. 2009;43(8):784-91.
147. Nakao T, Nakagawa A, Yoshiura T, Nakatani E, Nabeyama M, Sanematsu H, et al. Duration effect of obsessive-compulsive disorder on cognitive function: a functional MRI study. *Depress Anxiety*. 2009;26(9):814-23.
148. Nelson EE, Vinton DT, Berghorst L, Towbin KE, Hommer RE, Dickstein DP, et al. Brain systems underlying response flexibility in healthy and bipolar adolescents: an event-related fMRI study. *Bipolar Disord*. 2007;9(8):810-9.
149. Nestor LJ, Ghahremani DG, Monterosso J, London ED. Prefrontal hypoactivation during cognitive control in early abstinent methamphetamine-dependent subjects. *Psychiatry Res*. 2011;194(3):287-95.
150. Niendam TA, Lesh TA, Yoon J, Westphal AJ, Hutchison N, Daniel Ragland J, et al. Impaired context processing as a potential marker of psychosis risk state. *Psychiatry Res*. 2014;221(1):13-20.
151. Oertel-Knochel V, Reinke B, Feddern R, Knake A, Knochel C, Prvulovic D, et al. Verbal episodic memory deficits in remitted bipolar patients: a combined behavioural and fMRI study. *J Affect Disord*. 2013;150(2):430-40.
152. Oertel-Knochel V, Reinke B, Feddern R, Knake A, Knochel C, Prvulovic D, et al. Episodic memory impairments in bipolar disorder are associated with functional and structural brain changes. *Bipolar Disord*. 2014;16(8):830-45.
153. Oflaz S, Akyuz F, Hamamci A, Firat Z, Kesinkilic C, Kilickesmez O, et al. Working memory dysfunction in delusional disorders: an fMRI investigation. *J Psychiatr Res*. 2014;56:43-9.
154. Ojeda N, Ortuno F, Arbizu J, Lopez P, Marti-Climent JM, Penuelas I, et al. Functional neuroanatomy of sustained attention in schizophrenia: contribution of parietal cortices. *Hum Brain Mapp*. 2002;17(2):116-30.
155. Ongur D, Cullen TJ, Wolf DH, Rohan M, Barreira P, Zalesak M, et al. The neural basis of relational memory deficits in schizophrenia. *Arch Gen Psychiatry*. 2006;63(4):356-65.
156. Ortiz-Gil J, Pomarol-Clotet E, Salvador R, Canales-Rodriguez EJ, Sarro S, Gomar JJ, et al. Neural correlates of cognitive impairment in schizophrenia. *Br J Psychiatry*. 2011;199(3):202-10.
157. Padula CB, Schweinsburg AD, Tapert SF. Spatial working memory performance and fMRI activation interaction in abstinent adolescent marijuana users. *Psychol Addict Behav*. 2007;21(4):478-87.

158. Pae CU, Juh R, Yoo SS, Choi BG, Lim HK, Lee C, et al. Verbal working memory dysfunction in schizophrenia: an fMRI investigation. *Int J Neurosci*. 2008;118(10):1467-87.
159. Page LA, Rubia K, Deeley Q, Daly E, Toal F, Mataix-Cols D, et al. A functional magnetic resonance imaging study of inhibitory control in obsessive-compulsive disorder. *Psychiatry Res*. 2009;174(3):202-9.
160. Paulus MP, Hozack NE, Zauscher BE, Frank L, Brown GG, McDowell J, et al. Parietal dysfunction is associated with increased outcome-related decision-making in schizophrenia patients. *Biol Psychiatry*. 2002;51(12):995-1004.
161. Passarotti AM, Sweeney JA, Pavuluri MN. Neural correlates of response inhibition in pediatric bipolar disorder and attention deficit hyperactivity disorder. *Psychiatry Res*. 2010;181(1):36-43.
162. Paulus MP, Hozack NE, Zauscher BE, Frank L, Brown GG, Braff DL, et al. Behavioral and functional neuroimaging evidence for prefrontal dysfunction in methamphetamine-dependent subjects. *Neuropsychopharmacology*. 2002;26(1):53-63.
163. Pavuluri MN, Passarotti AM, Harral EM, Sweeney JA. Enhanced prefrontal function with pharmacotherapy on a response inhibition task in adolescent bipolar disorder. *J Clin Psychiatry*. 2010;71(11):1526-34.
164. Pedersen A, Wilmsmeier A, Wiedl KH, Bauer J, Kueppers K, Koelkebeck K, et al. Anterior cingulate cortex activation is related to learning potential on the WCST in schizophrenia patients. *Brain Cogn*. 2012;79(3):245-51.
165. Penfold C, Vizueta N, Townsend JD, Bookheimer SY, Altshuler LL. Frontal lobe hypoactivation in medication-free adults with bipolar II depression during response inhibition. *Psychiatry Res*. 2015;231(3):202-9.
166. Perlstein WM, Carter CS, Noll DC, Cohen JD. Relation of prefrontal cortex dysfunction to working memory and symptoms in schizophrenia. *Am J Psychiatry*. 2001;158(7):1105-13.
167. Pfefferbaum A, Desmond JE, Galloway C, Menon V, Glover GH, Sullivan EV. Reorganization of frontal systems used by alcoholics for spatial working memory: an fMRI study. *Neuroimage*. 2001;14(1 Pt 1):7-20.
168. Pirnia T, Woods RP, Hamilton LS, Lyden H, Joshi SH, Asarnow RF, et al. Hippocampal dysfunction during declarative memory encoding in schizophrenia and effects of genetic liability. *Schizophr Res*. 2015;161(2-3):357-66.
169. Pitel AL, Chanraud S, Muller-Oehring EM, Pfefferbaum A, Sullivan EV. Modulation of limbic-cerebellar functional connectivity enables alcoholics to recognize who is who. *Brain Struct Funct*. 2013;218(3):683-95.
170. Pomarol-Clotet E, Salvador R, Sarro S, Gomar J, Vila F, Martinez A, et al. Failure to deactivate in the prefrontal cortex in schizophrenia: dysfunction of the default mode network? *Psychol Med*. 2008;38(8):1185-93.
171. Pomarol-Clotet E, Moro N, Sarro S, Goikolea JM, Vieta E, Amann B, et al. Failure of de-activation in the medial frontal cortex in mania: evidence for default mode network dysfunction in the disorder. *World J Biol Psychiatry*. 2012;13(8):616-26.
172. Pomarol-Clotet E, Alonso-Lana S, Moro N, Sarro S, Bonnin MC, Goikolea JM, et al. Brain functional changes across the different phases of bipolar disorder. *Br J Psychiatry*. 2015;206(2):136-44.
173. Potkin SG, Alva G, Fleming K, Anand R, Keator D, Carreon D, et al. A PET study of the pathophysiology of negative symptoms in schizophrenia. Positron emission tomography. *Am J Psychiatry*. 2002;159(2):227-37.

174. Quide Y, Morris RW, Shepherd AM, Rowland JE, Green MJ. Task-related fronto-striatal functional connectivity during working memory performance in schizophrenia. *Schizophr Res.* 2013;150(2-3):468-75.
175. Ragland JD, Gur RC, Glahn DC, Censits DM, Smith RJ, Lazarev MG, et al. Frontotemporal cerebral blood flow change during executive and declarative memory tasks in schizophrenia: a positron emission tomography study. *Neuropsychology.* 1998;12(3):399-413.
176. Ragland JD, Gur RC, Raz J, Schroeder L, Kohler CG, Smith RJ, et al. Effect of schizophrenia on frontotemporal activity during word encoding and recognition: a PET cerebral blood flow study. *Am J Psychiatry.* 2001;158(7):1114-25.
177. Ragland JD, Gur RC, Valdez J, Turetsky BI, Elliott M, Kohler C, et al. Event-related fMRI of frontotemporal activity during word encoding and recognition in schizophrenia. *Am J Psychiatry.* 2004;161(6):1004-15.
178. Ragland JD, Gur RC, Valdez JN, Loughhead J, Elliott M, Kohler C, et al. Levels-of-processing effect on frontotemporal function in schizophrenia during word encoding and recognition. *Am J Psychiatry.* 2005;162(10):1840-8.
179. Ragland JD, Moelter ST, Bhati MT, Valdez JN, Kohler CG, Siegel SJ, et al. Effect of retrieval effort and switching demand on fMRI activation during semantic word generation in schizophrenia. *Schizophr Res.* 2008;99(1-3):312-23.
180. Ragland JD, Blumenfeld RS, Ramsay IS, Yonelinas A, Yoon J, Solomon M, et al. Neural correlates of relational and item-specific encoding during working and long-term memory in schizophrenia. *Neuroimage.* 2012;59(2):1719-26.
181. Rametti G, Junque C, Vendrell P, Catalan R, Penades R, Bargallo N, et al. Hippocampal underactivation in an fMRI study of word and face memory recognition in schizophrenia. *Eur Arch Psychiatry Clin Neurosci.* 2009;259(4):203-11.
182. Rasetti R, Mattay VS, White MG, Sambataro F, Podell JE, Zolnick B, et al. Altered hippocampal-parahippocampal function during stimulus encoding: a potential indicator of genetic liability for schizophrenia. *JAMA Psychiatry.* 2014;71(3):236-47.
183. Remijnse PL, van den Heuvel OA, Nielen MM, Vriend C, Hendriks GJ, Hoogendijk WJ, et al. Cognitive inflexibility in obsessive-compulsive disorder and major depression is associated with distinct neural correlates. *PLoS One.* 2013;8(4):e59600.
184. Roberts GM, Garavan H. Evidence of increased activation underlying cognitive control in ecstasy and cannabis users. *Neuroimage.* 2010;52(2):429-35.
185. Robinson JL, Bearden CE, Monkul ES, Tordesillas-Gutierrez D, Velligan DI, Frangou S, et al. Fronto-temporal dysregulation in remitted bipolar patients: an fMRI delayed-non-match-to-sample (DNMS) study. *Bipolar Disord.* 2009;11(4):351-60.
186. Rodriguez-Cano E, Sarro S, Monte GC, Maristany T, Salvador R, McKenna PJ, et al. Evidence for structural and functional abnormality in the subgenual anterior cingulate cortex in major depressive disorder. *Psychol Med.* 2014;44(15):3263-73.
187. Roth RM, Saykin AJ, Flashman LA, Pixley HS, West JD, Mamourian AC. Event-related functional magnetic resonance imaging of response inhibition in obsessive-compulsive disorder. *Biol Psychiatry.* 2007;62(8):901-9.
188. Roth RM, Koven NS, Randolph JJ, Flashman LA, Pixley HS, Ricketts SM, et al. Functional magnetic resonance imaging of executive control in bipolar disorder. *Neuroreport.* 2006;17(11):1085-9.
189. Rowland LM, Griego JA, Spieker EA, Cortes CR, Holcomb HH. Neural changes associated with relational learning in schizophrenia. *Schizophr Bull.* 2010;36(3):496-503.
190. Royer A, Schneider FC, Gosselin A, Pellet J, Barral FG, Laurent B, et al. Brain activation during executive processes in schizophrenia. *Psychiatry Res.* 2009;173(3):170-6.

191. Rubia K, Russell T, Bullmore ET, Soni W, Brammer MJ, Simmons A, et al. An fMRI study of reduced left prefrontal activation in schizophrenia during normal inhibitory function. *Schizophr Res*. 2001;52(1-2):47-55.
192. Sabri O, Owega A, Schreckenberger M, Sturz L, Fimm B, Kunert P, et al. A truly simultaneous combination of functional transcranial Doppler sonography and H(2)(15)O PET adds fundamental new information on differences in cognitive activation between schizophrenics and healthy control subjects. *J Nucl Med*. 2003;44(5):671-81.
193. Salgado-Pineda P, Junque C, Vendrell P, Baeza I, Bargallo N, Falcon C, et al. Decreased cerebral activation during CPT performance: structural and functional deficits in schizophrenic patients. *Neuroimage*. 2004;21(3):840-7.
194. Sapara A, Ffytche DH, Birchwood M, Cooke MA, Fannon D, Williams SC, et al. Preservation and compensation: the functional neuroanatomy of insight and working memory in schizophrenia. *Schizophr Res*. 2014;152(1):201-9.
195. Sareen J, Campbell DW, Leslie WD, Malisza KL, Stein MB, Paulus MP, et al. Striatal function in generalized social phobia: a functional magnetic resonance imaging study. *Biol Psychiatry*. 2007;61(3):396-404.
196. Scheuerecker J, Ufer S, Zipse M, Frodl T, Koutsouleris N, Zetzsche T, et al. Cerebral changes and cognitive dysfunctions in medication-free schizophrenia - an fMRI study. *J Psychiatr Res*. 2008;42(6):469-76.
197. Schlosser RG, Koch K, Wagner G, Nenadic I, Roebel M, Schachtzabel C, et al. Inefficient executive cognitive control in schizophrenia is preceded by altered functional activation during information encoding: an fMRI study. *Neuropsychologia*. 2008;46(1):336-47.
198. Schulte T, Muller-Oehring EM, Sullivan EV, Pfefferbaum A. Synchrony of corticostriatal-midbrain activation enables normal inhibitory control and conflict processing in recovering alcoholic men. *Biol Psychiatry*. 2012;71(3):269-78.
199. Schweinsburg AD, Schweinsburg BC, Cheung EH, Brown GG, Brown SA, Tapert SF. fMRI response to spatial working memory in adolescents with comorbid marijuana and alcohol use disorders. *Drug Alcohol Depend*. 2005;79(2):201-10.
200. Semple WE, Goyer PF, McCormick R, Donovan B, Muzic RF, Jr., Rugle L, et al. Higher brain blood flow at amygdala and lower frontal cortex blood flow in PTSD patients with comorbid cocaine and alcohol abuse compared with normals. *Psychiatry*. 2000;63(1):65-74.
201. Sepede G, De Berardis D, Campanella D, Perrucci MG, Ferretti A, Serroni N, et al. Impaired sustained attention in euthymic bipolar disorder patients and non-affected relatives: an fMRI study. *Bipolar Disord*. 2012;14(7):764-79.
202. Schaufelberger M, Senhorini MC, Barreiros MA, Amaro E, Jr., Menezes PR, Sczufca M, et al. Frontal and anterior cingulate activation during overt verbal fluency in patients with first episode psychosis. *Rev Bras Psiquiatr*. 2005;27(3):228-32.
203. Singh MK, Chang KD, Mazaika P, Garrett A, Adleman N, Kelley R, et al. Neural correlates of response inhibition in pediatric bipolar disorder. *J Child Adolesc Psychopharmacol*. 2010;20(1):15-24.
204. Smith AM, Longo CA, Fried PA, Hogan MJ, Cameron I. Effects of marijuana on visuospatial working memory: an fMRI study in young adults. *Psychopharmacology (Berl)*. 2010;210(3):429-38.
205. Stephane M, Hagen MC, Lee JT, Uecker J, Pardo PJ, Kuskowski MA, et al. About the mechanisms of auditory verbal hallucinations: a positron emission tomographic study. *J Psychiatry Neurosci*. 2006;31(6):396-405.

206. Strakowski SM, Adler CM, Holland SK, Mills N, DelBello MP. A preliminary fMRI study of sustained attention in euthymic, unmedicated bipolar disorder. *Neuropsychopharmacology*. 2004;29(9):1734-40.
207. Strakowski SM, Adler CM, Holland SK, Mills NP, DelBello MP, Eliassen JC. Abnormal fMRI brain activation in euthymic bipolar disorder patients during a counting Stroop interference task. *Am J Psychiatry*. 2005;162(9):1697-705.
208. Strakowski SM, Adler CM, Cerullo M, Eliassen JC, Lamy M, Fleck DE, et al. Magnetic resonance imaging brain activation in first-episode bipolar mania during a response inhibition task. *Early Interv Psychiatry*. 2008;2(4):225-33.
209. Sugranyes G, Kyriakopoulos M, Dima D, O'Muircheartaigh J, Corrigall R, Pendelbury G, et al. Multimodal analyses identify linked functional and white matter abnormalities within the working memory network in schizophrenia. *Schizophr Res*. 2012;138(2-3):136-42.
210. Surguladze SA, Chu EM, Evans A, Anilkumar AP, Patel MX, Timehin C, et al. The effect of long-acting risperidone on working memory in schizophrenia: a functional magnetic resonance imaging study. *J Clin Psychopharmacol*. 2007;27(6):560-70.
211. Tan HY, Choo WC, Fones CS, Chee MW. fMRI study of maintenance and manipulation processes within working memory in first-episode schizophrenia. *Am J Psychiatry*. 2005;162(10):1849-58.
212. Tan HY, Sust S, Buckholtz JW, Mattay VS, Meyer-Lindenberg A, Egan MF, et al. Dysfunctional prefrontal regional specialization and compensation in schizophrenia. *Am J Psychiatry*. 2006;163(11):1969-77.
213. Tanabe J, Thompson L, Claus E, Dalwani M, Hutchison K, Banich MT. Prefrontal cortex activity is reduced in gambling and nongambling substance users during decision-making. *Hum Brain Mapp*. 2007;28(12):1276-86.
214. Tapert SF, Brown GG, Kindermann SS, Cheung EH, Frank LR, Brown SA. fMRI measurement of brain dysfunction in alcohol-dependent young women. *Alcohol Clin Exp Res*. 2001;25(2):236-45.
215. Tapert SF, Schweinsburg AD, Barlett VC, Brown SA, Frank LR, Brown GG, et al. Blood oxygen level dependent response and spatial working memory in adolescents with alcohol use disorders. *Alcohol Clin Exp Res*. 2004;28(10):1577-86.
216. Tapert SF, Schweinsburg AD, Drummond SP, Paulus MP, Brown SA, Yang TT, et al. Functional MRI of inhibitory processing in abstinent adolescent marijuana users. *Psychopharmacology (Berl)*. 2007;194(2):173-83.
217. Taylor Tavares JV, Clark L, Furey ML, Williams GB, Sahakian BJ, Drevets WC. Neural basis of abnormal response to negative feedback in unmedicated mood disorders. *Neuroimage*. 2008;42(3):1118-26.
218. Tendolkar I, Weis S, Guddat O, Fernandez G, Brockhaus-Dumke A, Specht K, et al. Evidence for a dysfunctional retrosplenial cortex in patients with schizophrenia: a functional magnetic resonance imaging study with a semantic-perceptual contrast. *Neurosci Lett*. 2004;369(1):4-8.
219. Tomasi D, Goldstein RZ, Telang F, Maloney T, Alia-Klein N, Caparelli EC, et al. Widespread disruption in brain activation patterns to a working memory task during cocaine abstinence. *Brain Res*. 2007;1171:83-92.
220. Townsend JD, Bookheimer SY, Foland-Ross LC, Moody TD, Eisenberger NI, Fischer JS, et al. Deficits in inferior frontal cortex activation in euthymic bipolar disorder patients during a response inhibition task. *Bipolar Disord*. 2012;14(4):442-50.
221. Tregellas JR, Tanabe JL, Miller DE, Ross RG, Olincy A, Freedman R. Neurobiology of smooth pursuit eye movement deficits in schizophrenia: an fMRI study. *Am J Psychiatry*. 2004;161(2):315-21.

222. Ungar L, Nestor PG, Niznikiewicz MA, Wible CG, Kubicki M. Color Stroop and negative priming in schizophrenia: an fMRI study. *Psychiatry Res.* 2010;181(1):24-9.
223. van den Heuvel OA, Veltman DJ, Groenewegen HJ, Cath DC, van Balkom AJ, van Hartskamp J, et al. Frontal-striatal dysfunction during planning in obsessive-compulsive disorder. *Arch Gen Psychiatry.* 2005;62(3):301-9.
224. Viard A, Flament MF, Artiges E, Dehaene S, Naccache L, Cohen D, et al. Cognitive control in childhood-onset obsessive-compulsive disorder: a functional MRI study. *Psychol Med.* 2005;35(7):1007-17.
225. Vilgis V, Chen J, Silk TJ, Cunnington R, Vance A. Frontoparietal function in young people with dysthymic disorder (DSM-5: Persistent depressive disorder) during spatial working memory. *J Affect Disord.* 2014;160:34-42.
226. Vinogradov S, Luks TL, Schulman BJ, Simpson GV. Deficit in a neural correlate of reality monitoring in schizophrenia patients. *Cereb Cortex.* 2008;18(11):2532-9.
227. Walter H, Wunderlich AP, Blankenhorn M, Schafer S, Tomczak R, Spitzer M, et al. No hypofrontality, but absence of prefrontal lateralization comparing verbal and spatial working memory in schizophrenia. *Schizophr Res.* 2003;61(2-3):175-84.
228. Walter H, Wolf RC, Spitzer M, Vasic N. Increased left prefrontal activation in patients with unipolar depression: an event-related, parametric, performance-controlled fMRI study. *J Affect Disord.* 2007;101(1-3):175-85.
229. Walter H, Vasic N, Hose A, Spitzer M, Wolf RC. Working memory dysfunction in schizophrenia compared to healthy controls and patients with depression: evidence from event-related fMRI. *Neuroimage.* 2007;35(4):1551-61.
230. Weisenbach SL, Kassel MT, Rao J, Weldon AL, Avery ET, Briceno EM, et al. Differential prefrontal and subcortical circuitry engagement during encoding of semantically related words in patients with late-life depression. *Int J Geriatr Psychiatry.* 2014;29(11):1104-15.
231. Weiss EM, Siedentopf C, Golaszewski S, Mottaghy FM, Hofer A, Kremser C, et al. Brain activation patterns during a selective attention test--a functional MRI study in healthy volunteers and unmedicated patients during an acute episode of schizophrenia. *Psychiatry Res.* 2007;154(1):31-40.
232. Weiss EM, Golaszewski S, Mottaghy FM, Hofer A, Hausmann A, Kemmler G, et al. Brain activation patterns during a selective attention test-a functional MRI study in healthy volunteers and patients with schizophrenia. *Psychiatry Res.* 2003;123(1):1-15.
233. Wen SL, Cheng MF, Cheng MH, Yue JH, Li JF, Xie LJ. Neurocognitive dysfunction and regional cerebral blood flow in medically naive patients with obsessive-compulsive disorder. *Dev Neuropsychol.* 2014;39(1):37-50.
234. Werner NS, Meindl T, Materne J, Engel RR, Huber D, Riedel M, et al. Functional MRI study of memory-related brain regions in patients with depressive disorder. *J Affect Disord.* 2009;119(1-3):124-31.
235. White T, Hongwanishkul D, Schmidt M. Increased anterior cingulate and temporal lobe activity during visuospatial working memory in children and adolescents with schizophrenia. *Schizophr Res.* 2011;125(2-3):118-28.
236. Wilmsmeier A, Ohrmann P, Suslow T, Siegmund A, Koelkebeck K, Rothermundt M, et al. Neural correlates of set-shifting: decomposing executive functions in schizophrenia. *J Psychiatry Neurosci.* 2010;35(5):321-9.
237. Wiser AK, Andreasen NC, O'Leary DS, Watkins GL, Boles Ponto LL, Hichwa RD. Dysfunctional cortico-cerebellar circuits cause 'cognitive dysmetria' in schizophrenia. *Neuroreport.* 1998;9(8):1895-9.

238. Wojtalik JA, Barch DM. An fMRI study of the influence of a history of substance abuse on working memory-related brain activation in schizophrenia. *Front Psychiatry*. 2014;5:1.
239. Wolf DH, Gerraty R, Satterthwaite TD, Loughhead J, Campellone T, Elliott MA, et al. Striatal intrinsic reinforcement signals during recognition memory: relationship to response bias and dysregulation in schizophrenia. *Front Behav Neurosci*. 2011;5:81.
240. Woodward ND, Waldie B, Rogers B, Tibbo P, Seres P, Purdon SE. Abnormal prefrontal cortical activity and connectivity during response selection in first episode psychosis, chronic schizophrenia, and unaffected siblings of individuals with schizophrenia. *Schizophr Res*. 2009;109(1-3):182-90.
241. Woolley J, Heyman I, Brammer M, Frampton I, McGuire PK, Rubia K. Brain activation in paediatric obsessive compulsive disorder during tasks of inhibitory control. *Br J Psychiatry*. 2008;192(1):25-31.
242. Wykes T, Brammer M, Mellers J, Bray P, Reeder C, Williams C, et al. Effects on the brain of a psychological treatment: cognitive remediation therapy: functional magnetic resonance imaging in schizophrenia. *Br J Psychiatry*. 2002;181:144-52.
243. Yamamoto DJ, Reynolds J, Krmpotich T, Banich MT, Thompson L, Tanabe J. Temporal profile of fronto-striatal-limbic activity during implicit decisions in drug dependence. *Drug Alcohol Depend*. 2014;136:108-14.
244. Yang TT, Simmons AN, Matthews SC, Tapert SF, Frank GK, Bischoff-Grethe A, et al. Depressed adolescents demonstrate greater subgenual anterior cingulate activity. *Neuroreport*. 2009;20(4):440-4.
245. Yoo SS, Choi BG, Juh RH, Park JM, Pae CU, Kim JJ, et al. Working memory processing of facial images in schizophrenia: fMRI investigation. *Int J Neurosci*. 2005;115(3):351-66.
246. Yoon JH, Minzenberg MJ, Ursu S, Ryan Walter BS, Wendelken C, Ragland JD, et al. Association of dorsolateral prefrontal cortex dysfunction with disrupted coordinated brain activity in schizophrenia: relationship with impaired cognition, behavioral disorganization, and global function. *Am J Psychiatry*. 2008;165(8):1006-14.
247. Yoshimura Y, Okamoto Y, Onoda K, Okada G, Toki S, Yoshino A, et al. Psychosocial functioning is correlated with activation in the anterior cingulate cortex and left lateral prefrontal cortex during a verbal fluency task in euthymic bipolar disorder: a preliminary fMRI study. *Psychiatry Clin Neurosci*. 2014;68(3):188-96.
248. Yucel M, Harrison BJ, Wood SJ, Fornito A, Wellard RM, Pujol J, et al. Functional and biochemical alterations of the medial frontal cortex in obsessive-compulsive disorder. *Arch Gen Psychiatry*. 2007;64(8):946-55.
249. Yucel M, Lubman DI, Harrison BJ, Fornito A, Allen NB, Wellard RM, et al. A combined spectroscopic and functional MRI investigation of the dorsal anterior cingulate region in opiate addiction. *Mol Psychiatry*. 2007;12(7):611, 91-702.
250. Zedkova L, Woodward ND, Harding I, Tibbo PG, Purdon SE. Procedural learning in schizophrenia investigated with functional magnetic resonance imaging. *Schizophr Res*. 2006;88(1-3):198-207.
251. Zierhut K, Bogerts B, Schott B, Fenker D, Walter M, Albrecht D, et al. The role of hippocampus dysfunction in deficient memory encoding and positive symptoms in schizophrenia. *Psychiatry Res*. 2010;183(3):187-94.

Supplementary Table 2. Proportion of studies within each diagnostic group corresponding to each task domain

| <i>Diagnostic Group (# of Studies by Diagnosis)</i> | <i>Total # of Studies (N=283)</i> | <i>Schizophrenia Spectrum Disorders (N=139)</i> | <i>Bipolar Disorders (N=50)</i> | <i>Unipolar Depressive Disorders (N=27)</i> | <i>Anxiety Disorders (N=32)</i> | <i>Substance Use Disorders (N=35)</i> |
|-----------------------------------------------------|-----------------------------------|-------------------------------------------------|---------------------------------|---------------------------------------------|---------------------------------|---------------------------------------|
| <i>Domain</i>                                       |                                   |                                                 |                                 |                                             |                                 |                                       |
| Performance Monitoring                              | 11                                | 0.05                                            | 0.04                            | 0.04                                        | 0.03                            | 0                                     |
| Response Selection                                  | 12                                | 0.04                                            | 0.02                            | 0.04                                        | 0.03                            | 0.11                                  |
| Set Shifting                                        | 15                                | 0.04                                            | 0.02                            | 0.11                                        | 0.16                            | 0                                     |
| Verbal Fluency                                      | 17                                | 0.06                                            | 0.14                            | 0.04                                        | 0                               | 0                                     |
| Other                                               | 18                                | 0.09                                            | 0                               | 0                                           | 0.03                            | 0.03                                  |
| Conflict Monitoring                                 | 31                                | 0.07                                            | 0.10                            | 0                                           | 0.28                            | 0.20                                  |
| Recognition Memory                                  | 37                                | 0.19                                            | 0.10                            | 0.07                                        | 0.03                            | 0.06                                  |
| Response Inhibition                                 | 42                                | 0.06                                            | 0.26                            | 0.22                                        | 0.22                            | 0.23                                  |
| Working Memory                                      | 100                               | 0.39                                            | 0.32                            | 0.37                                        | 0.22                            | 0.37                                  |

The Other domain consisted of a diverse set of low frequency studies that did not cohere into a particular cognitive control domain (i.e., recall memory n=9; implicit learning n=5; decision making n=3; reading n=1).



Supplementary Table 3. Peak coordinates of clusters derived from Activation Likelihood Estimation (ALE) meta-analysis of transdiagnostic pooled patient hyper- and hypoactivation (i.e., aberrant activation) during functional neuroimaging of cognitive control tasks.

| Region                                                                               | Cluster Size (voxels) | Peak Intensity (Z) | MNI Coordinates |     |     |
|--------------------------------------------------------------------------------------|-----------------------|--------------------|-----------------|-----|-----|
|                                                                                      |                       |                    | X               | Y   | Z   |
| dorsal anterior cingulate                                                            | 354                   | 4.39               | -2              | 36  | 14  |
| anterior mid-cingulate cortex/pre-supplementary motor area                           | 355                   | 4.30               | 4               | 22  | 32  |
| right insula (extending to ventrolateral prefrontal cortex)                          | 679                   | 5.42               | 34              | 28  | -10 |
| right intraparietal sulcus                                                           | 531                   | 4.67               | 38              | -44 | 46  |
| left prefrontal cortex extending from mid-dorsolateral prefrontal to premotor cortex | 1049                  | 4.48               | -48             | 22  | 26  |

Supplementary Table 4. Percent contribution to clusters of convergence for whole-brain pooled aberrant activation meta-analytic contrasts by experiment sample and design characteristics.

| Experiment sample/<br>design characteristics | Cluster of convergence                                             |                           |                                 |                                           |                                                              |
|----------------------------------------------|--------------------------------------------------------------------|---------------------------|---------------------------------|-------------------------------------------|--------------------------------------------------------------|
|                                              | Right anterior<br>insula/<br>ventrolateral<br>prefrontal<br>cortex | Left<br>frontal<br>cortex | Dorsal<br>anterior<br>cingulate | Anterior<br>mid-<br>cingulate/<br>pre-SMA | Right<br>Intra-<br>parietal<br>sulcus/<br>parietal<br>cortex |
| <b>Contrast Direction</b>                    |                                                                    |                           |                                 |                                           |                                                              |
| Control > Patient                            | 79.47                                                              | 61.54                     | 76.98                           | 56.08                                     | 60.35                                                        |
| Patient > Control                            | 20.53                                                              | 38.46                     | 23.02                           | 43.92                                     | 39.65                                                        |
| <b>Disorder Class</b>                        |                                                                    |                           |                                 |                                           |                                                              |
| Non-psychotic                                | 52.07                                                              | 37.18                     | 48.69                           | 34.52                                     | 59.61                                                        |
| Psychotic                                    | 47.93                                                              | 62.82                     | 51.31                           | 65.48                                     | 40.39                                                        |
| <b>Diagnosis</b>                             |                                                                    |                           |                                 |                                           |                                                              |
| Schizophrenia                                | 47.93                                                              | 62.82                     | 51.31                           | 65.48                                     | 40.39                                                        |
| Substance Use                                | 16.88                                                              | 9.54                      | 14.84                           | 8.76                                      | 22.06                                                        |
| Anxiety                                      | 16.06                                                              | 10.38                     | 16.53                           | 10.02                                     | 7.33                                                         |
| Bipolar Disorder                             | 15.06                                                              | 6.26                      | 2.82                            | 10.87                                     | 17.86                                                        |
| Major Depression                             | 4.07                                                               | 11.0                      | 14.5                            | 4.87                                      | 12.36                                                        |
| <b>Domain</b>                                |                                                                    |                           |                                 |                                           |                                                              |
| Working Memory                               | 34.69                                                              | 45.08                     | 26.98                           | 27.64                                     | 36.77                                                        |
| Recognition                                  | 16.09                                                              | 13.99                     | 13.85                           | 18.92                                     | 11.24                                                        |
| Response Inhibition                          | 15.84                                                              | 6.98                      | 17.69                           | 2.75                                      | 18.69                                                        |
| Set Shifting                                 | 9.74                                                               | 4.65                      | 14.15                           | 7.51                                      | 7.62                                                         |
| Conflict Monitoring                          | 7.22                                                               | 7.82                      | 15.88                           | 12.01                                     | 11.56                                                        |
| Response Selection                           | 4.97                                                               | 5.75                      | 3.33                            | 4.5                                       | 10.44                                                        |
| Performance Monitoring                       | 3.65                                                               | 0                         | 0.22                            | 5.03                                      | 3.6                                                          |
| Verbal Fluency                               | 3.35                                                               | 7.76                      | 7.9                             | 15.08                                     | 0.03                                                         |
| Other                                        | 4.46                                                               | 7.96                      | 0                               | 6.57                                      | 0.06                                                         |
| <b>Age Group</b>                             |                                                                    |                           |                                 |                                           |                                                              |
| Child/adolescent                             | 12.99                                                              | 6.72                      | 18.48                           | 1.2                                       | 10.36                                                        |
| Adult                                        | 86.09                                                              | 92.89                     | 77.0                            | 98.79                                     | 85.05                                                        |
| Older adult                                  | 0.91                                                               | 0.39                      | 4.51                            | 0.01                                      | 4.59                                                         |
| <b>Current Psychotropic Medication</b>       |                                                                    |                           |                                 |                                           |                                                              |
| Yes                                          | 69.82                                                              | 66.18                     | 57.72                           | 73.45                                     | 57.81                                                        |
| No                                           | 14.63                                                              | 25.78                     | 35.54                           | 12.09                                     | 28.98                                                        |
| Not reported                                 | 15.55                                                              | 8.04                      | 6.74                            | 14.47                                     | 13.21                                                        |
| <b>Behavioral Performance</b>                |                                                                    |                           |                                 |                                           |                                                              |
| Worse than Control Group                     | 47.52                                                              | 42.65                     | 28.97                           | 32.08                                     | 44.63                                                        |
| Equivalent to Control Group                  | 52.37                                                              | 57.35                     | 71.03                           | 67.67                                     | 55.91                                                        |
| Not reported                                 | 0.11                                                               | 0                         | 0                               | 0.25                                      | 0.05                                                         |
| <b>Imaging Modality</b>                      |                                                                    |                           |                                 |                                           |                                                              |

|                                 |       |       |       |       |       |
|---------------------------------|-------|-------|-------|-------|-------|
| Functional MRI                  | 95.77 | 84.69 | 92.15 | 93.55 | 9142  |
| PET                             | 4.23  | 14.86 | 7.85  | 6.22  | 8.57  |
| ASL                             | 0     | 0.46  | 0     | 0.22  | 0.01  |
| SPECT                           | 0     | 0     | 0     | 0     | 0     |
| Tasks                           |       |       |       |       |       |
| Antisaccade                     | 0     | 0     | 0     | 0     | 0     |
| Beads in the bottle             | 0.11  | 0     | 0     | 0.15  | 2.36  |
| Choice reaction time            | 0     | 3.23  | 0     | 4.04  | 0     |
| Continuous performance          | 3.65  | 0.07  | 0.22  | 5.03  | 3.6   |
| Delay discounting               | 0     | 2.07  | 0     | 0.02  | 1.95  |
| Delayed match-to-sample         | 7.15  | 13.66 | 5.21  | 0.09  | 9.55  |
| Finger tapping                  | 0     | 0.57  | 0     | 0     | 0     |
| Flanker                         | 0     | 0     | 0     | 1.52  | 0     |
| Go/no-go                        | 14.2  | 4.55  | 8.7   | 2.75  | 14.73 |
| Hayling sentence completion     | 0.06  | 0     | 0     | 0     | 0     |
| Match stimuli                   | 0     | 0     | 0     | 0     | 0     |
| Mental arithmetic               | 0     | 0     | 0     | 4.15  | 1.11  |
| Modified Iowa gambling task     | 4.66  | 0     | 3.21  | 0.05  | 6.05  |
| Multi-source interference       | 0.31  | 0.92  | 8.68  | 0.1   | 5.38  |
| N-back                          | 23.5  | 21.04 | 9.23  | 23.29 | 19.82 |
| Probabilistic reversal learning | 0     | 0.08  | 0     | 0     | 0     |
| Reading                         | 0     | 0.05  | 0     | 1.31  | 0     |
| Recall                          | 0.12  | 2.47  | 0     | 5.12  | 0.06  |
| Recognition                     | 16.13 | 12.32 | 13.85 | 14.77 | 11.24 |
| Semantic decision making        | 1.69  | 2.92  | 0.05  | 0.78  | 0.03  |
| Serial reaction time            | 2.65  | 1.95  | 0     | 0.07  | 0     |
| Set shifting                    | 2.65  | 0     | 2.4   | 0.02  | 0.01  |
| Simon task                      | 0     | 0     | 0     | 0     | 0     |
| Smooth pursuit                  | 0     | 0     | 0     | 0     | 0     |
| Source memory                   | 0.02  | 1.67  | 0     | 0     | 0     |
| Spatial working memory          | 0     | 4.95  | 6.33  | 0     | 0     |
| Sternberg working memory        | 3.98  | 5.44  | 1.2   | 0.01  | 6     |
| Stop signal task                | 1.64  | 2.36  | 8.98  | 0     | 3.96  |
| Stroop                          | 6.91  | 6.9   | 12.16 | 9.78  | 6.45  |
| Switch task                     | 6.06  | 0.04  | 0     | 3.62  | 3.95  |
| Tower of London                 | 0.19  | 0.46  | 0.13  | 0.23  | 0.08  |
| Transitive inference            | 0     | 0     | 0     | 4.14  | 0     |
| Two-choice prediction task      | 0     | 0     | 0     | 0     | 0     |
| Verbal fluency                  | 3.28  | 7.76  | 7.9   | 15.08 | 0.03  |
| Virtual Morris water task       | 0     | 0     | 0     | 0     | 0     |
| Wisconsin card sorting          | 1.02  | 4.53  | 11.75 | 3.86  | 3.66  |

Supplementary Table 5. Coordinates of clusters derived from a conjunction of the transdiagnostic pooled patient hyper- and hypoactivation (i.e., aberrant activation) and the multiple demand network identified from meta-analyses of healthy participants (25).

| Region                                                | Cluster Size (voxels) | Peak Intensity (Z) | MNI Coordinates |     |    |
|-------------------------------------------------------|-----------------------|--------------------|-----------------|-----|----|
|                                                       |                       |                    | X               | Y   | Z  |
| left inferior frontal gyrus/junction                  | 76                    | 2.02               | -44             | 12  | 28 |
| pre- supplementary motor area                         | 170                   | 2.16               | 4               | 22  | 40 |
| right anterior insula/ventrolateral prefrontal cortex | 79                    | 2.16               | 36              | 26  | -8 |
| right intraparietal sulcus                            | 48                    | 2.05               | 40              | -42 | 46 |

Supplementary Table 6. Peak coordinates of clusters derived from Activation Likelihood Estimation (ALE) meta-analysis of transdiagnostic patient hyper- and hypoactivation during functional neuroimaging of cognitive control tasks

| Contrast/ Region                                                                     | Cluster Size (voxels) | Peak Intensity (Z) | MNI Coordinates |     |     |
|--------------------------------------------------------------------------------------|-----------------------|--------------------|-----------------|-----|-----|
|                                                                                      |                       |                    | X               | Y   | Z   |
| <b>Control &gt; Patient</b>                                                          |                       |                    |                 |     |     |
| dorsal anterior cingulate                                                            | 380                   | 4.98               | -2              | 38  | 14  |
| right insula (extending to ventrolateral prefrontal cortex)                          | 586                   | 6.09               | 42              | 28  | -12 |
| left insula (extending to ventrolateral prefrontal cortex)                           | 307                   | 4.37               | -32             | 20  | -10 |
| right intraparietal sulcus                                                           | 336                   | 4.98               | 38              | -56 | 48  |
| left prefrontal cortex extending from mid-dorsolateral prefrontal to premotor cortex | 608                   | 4.17               | -48             | 24  | 26  |
| <b>Patient &gt; Control</b>                                                          |                       |                    |                 |     |     |
| anterior mid-cingulate cortex/pre-supplementary motor area                           | 216                   | 3.91               | 0               | 10  | 50  |

Supplementary Table 7. Peak coordinates of clusters derived from Activation Likelihood Estimation (ALE) meta-analysis of transdiagnostic patient hyper- and hypoactivation during functional neuroimaging of cognitive control tasks excluding the experiments of arterial spin labeling and single-photon emission computerized tomography

| Contrast/ Region                                                                     | Cluster Size (voxels) | Peak Intensity (Z) | MNI Coordinates |     |     |
|--------------------------------------------------------------------------------------|-----------------------|--------------------|-----------------|-----|-----|
|                                                                                      |                       |                    | X               | Y   | Z   |
| <b>Control &gt; Patient</b>                                                          |                       |                    |                 |     |     |
| dorsal anterior cingulate                                                            | 565                   | 5.0                | -2              | 38  | 14  |
| right insula (extending to ventrolateral prefrontal cortex)                          | 592                   | 6.10               | 42              | 28  | -12 |
| left insula (extending to ventrolateral prefrontal cortex)                           | 310                   | 4.38               | -32             | 20  | -10 |
| right intraparietal sulcus                                                           | 343                   | 5.0                | 38              | -56 | 48  |
| left prefrontal cortex extending from mid-dorsolateral prefrontal to premotor cortex | 622                   | 4.17               | -48             | 24  | 26  |
| <b>Patient &gt; Control</b>                                                          |                       |                    |                 |     |     |
| anterior mid-cingulate cortex/pre-supplementary motor area                           | 219                   | 3.92               | 0               | 10  | 50  |
| right intraparietal sulcus                                                           | 216                   | 4.12               | 24              | -60 | 56  |

Supplementary Table 8. Peak coordinates of clusters derived from Activation Likelihood Estimation (ALE) meta-analysis of transdiagnostic patient hyper- and hypoactivation during functional neuroimaging of cognitive control tasks excluding tasks that did not cohere in a domain

| Contrast/ Region                                                                     | Cluster Size (voxels) | Peak Intensity (Z) | X   | MNI Coordinates |     |
|--------------------------------------------------------------------------------------|-----------------------|--------------------|-----|-----------------|-----|
|                                                                                      |                       |                    |     | Y               | Z   |
| <b>Control &gt; Patient</b>                                                          |                       |                    |     |                 |     |
| dorsal anterior cingulate                                                            | 444                   | 5.08               | -2  | 38              | 14  |
| right insula (extending to ventrolateral prefrontal cortex)                          | 597                   | 6.05               | 42  | 28              | -12 |
| left insula (extending to ventrolateral prefrontal cortex)                           | 263                   | 4.46               | -32 | 20              | -10 |
| right intraparietal sulcus                                                           | 367                   | 5.08               | 38  | -56             | 48  |
| left prefrontal cortex extending from mid-dorsolateral prefrontal to premotor cortex | 573                   | 3.93               | -44 | 18              | 38  |
| <b>Patient &gt; Control</b>                                                          |                       |                    |     |                 |     |
| right intraparietal sulcus                                                           | 236                   | 4.17               | 24  | -60             | 56  |

Supplementary Table 9. Peak coordinates of clusters derived from Activation Likelihood Estimation (ALE) meta-analysis of transdiagnostic patient hyper- and hypoactivation during functional neuroimaging of cognitive control tasks excluding studies of children and older adults

| Contrast/ Region                                            | Cluster Size (voxels) | Peak Intensity (Z) | MNI Coordinates |     |     |
|-------------------------------------------------------------|-----------------------|--------------------|-----------------|-----|-----|
|                                                             |                       |                    | X               | Y   | Z   |
| <b>Control &gt; Patient</b>                                 |                       |                    |                 |     |     |
| dorsal anterior cingulate                                   | 302                   | 4.32               | -4              | 38  | 14  |
| right insula (extending to ventrolateral prefrontal cortex) | 554                   | 5.56               | 44              | 28  | -12 |
| right intraparietal sulcus                                  | 255                   | 5.11               | 38              | -56 | 48  |
| left prefrontal cortex                                      | 585                   | 4.22               | -48             | 24  | 26  |
| <b>Patient &gt; Control</b>                                 |                       |                    |                 |     |     |
| anterior mid-cingulate cortex/pre-supplementary motor area  | 211                   | 3.67               | -2              | 12  | 36  |



Supplementary Table 10. Percent contribution to clusters of convergence for whole-brain patient hypo- and hyper-activation contrasts by experiment sample and design characteristics.

| Experiment sample/<br>design characteristics | Cluster of convergence                                                |                                                                           |                        |                                 |                                                     |                                           |
|----------------------------------------------|-----------------------------------------------------------------------|---------------------------------------------------------------------------|------------------------|---------------------------------|-----------------------------------------------------|-------------------------------------------|
|                                              | Right<br>anterior<br>insula/<br>ventrolateral<br>prefrontal<br>cortex | Left<br>anterior<br>insula/<br>ventro-<br>lateral<br>prefrontal<br>cortex | Left frontal<br>cortex | Dorsal<br>anterior<br>cingulate | Right<br>intraparietal<br>sulcus/parietal<br>cortex | Anterior<br>mid-<br>cingulate/<br>pre-SMA |
| <b>Contrast Direction</b>                    |                                                                       |                                                                           |                        |                                 |                                                     |                                           |
| Control > Patient                            | 100                                                                   | 100                                                                       | 100                    | 100                             | 100                                                 | 0                                         |
| Patient > Control                            | 0                                                                     | 0                                                                         | 0                      | 0                               | 0                                                   | 100                                       |
| <b>Disorder Class</b>                        |                                                                       |                                                                           |                        |                                 |                                                     |                                           |
| Non-psychotic                                | 49.34                                                                 | 51.25                                                                     | 29.31                  | 47.06                           | 47.87                                               | 55.02                                     |
| Psychotic                                    | 50.66                                                                 | 48.75                                                                     | 70.69                  | 52.94                           | 52.13                                               | 44.98                                     |
| <b>Diagnosis</b>                             |                                                                       |                                                                           |                        |                                 |                                                     |                                           |
| Schizophrenia                                | 50.66                                                                 | 48.75                                                                     | 70.69                  | 52.94                           | 52.13                                               | 44.98                                     |
| Substance Use                                | 5.74                                                                  | 7.86                                                                      | 13.05                  | 12.26                           | 8.95                                                | 8.32                                      |
| Anxiety                                      | 20.41                                                                 | 4.77                                                                      | 3.56                   | 16.81                           | 9.5                                                 | 13.41                                     |
| Bipolar Disorder                             | 18                                                                    | 20.87                                                                     | 5.68                   | 4.54                            | 20.62                                               | 10.63                                     |
| Major Depression                             | 5.19                                                                  | 17.75                                                                     | 7.01                   | 13.45                           | 8.8                                                 | 22.65                                     |
| <b>Domain</b>                                |                                                                       |                                                                           |                        |                                 |                                                     |                                           |
| Working Memory                               | 30.45                                                                 | 56.4                                                                      | 36.84                  | 26.14                           | 26.59                                               | 33                                        |
| Recognition                                  | 15.54                                                                 | 14.45                                                                     | 17.73                  | 18.7                            | 19.39                                               | 13.69                                     |
| Response Inhibition                          | 24.74                                                                 | 10.47                                                                     | 8.18                   | 15.68                           | 15.6                                                | 8.33                                      |
| Set Shifting                                 | 11.28                                                                 | 0.3                                                                       | 4.62                   | 9.28                            | 12.89                                               | 1.21                                      |
| Conflict Monitoring                          | 8.04                                                                  | 5.14                                                                      | 11.94                  | 16.9                            | 11.94                                               | 12.31                                     |
| Response Selection                           | 0                                                                     | 4.3                                                                       | 3.44                   | 0.13                            | 9.26                                                | 0.46                                      |
| Performance Monitoring                       | 1.64                                                                  | 0                                                                         | 0                      | 0.53                            | 4.2                                                 | 0                                         |
| Verbal Fluency                               | 4.04                                                                  | 2.07                                                                      | 10.06                  | 12.64                           | 0                                                   | 28.8                                      |
| Other                                        | 4.28                                                                  | 6.86                                                                      | 7.19                   | 0                               | 0.13                                                | 2.21                                      |
| <b>Age Group</b>                             |                                                                       |                                                                           |                        |                                 |                                                     |                                           |
| Child/adolescent                             | 12.9                                                                  | 19.65                                                                     | 7.49                   | 15.64                           | 4.26                                                | 8.32                                      |

|                                 |       |       |       |       |       |       |
|---------------------------------|-------|-------|-------|-------|-------|-------|
| Adult                           | 87.1  | 80.32 | 92.1  | 84.36 | 92.4  | 91.68 |
| Older adult                     | 0     | 0.03  | 0.41  | 0     | 3.35  | 0     |
| Current Psychotropic Medication |       |       |       |       |       |       |
| Yes                             | 84.36 | 52.26 | 52.2  | 61.57 | 70    | 82.87 |
| No                              | 5.19  | 29.23 | 36.61 | 31.61 | 21.05 | 9.52  |
| Not reported                    | 10.44 | 18.51 | 11.19 | 6.82  | 8.95  | 7.61  |
| Behavioral Performance          |       |       |       |       |       |       |
| Worse than Control Group        | 50.49 | 39.81 | 41.08 | 16.37 | 47.89 | 21.19 |
| Equivalent to Control Group     | 49.51 | 60.19 | 58.92 | 83.63 | 51.98 | 77.97 |
| Not reported                    | 0     | 0     | 0     | 0     | 0.13  | 0.84  |
| Imaging Modality                |       |       |       |       |       |       |
| Functional MRI                  | 94.86 | 93.15 | 83.76 | 88.22 | 86.79 | 99.89 |
| PET                             | 5.14  | 6.85  | 15.82 | 11.78 | 13.2  | 0.11  |
| ASL                             | 0     | 0     | 0.42  | 0     | 0     | 0     |
| SPECT                           | 0     | 0     | 0     | 0     | 0     | 0     |
| Tasks                           |       |       |       |       |       |       |
| Antisaccade                     | 0     | 0     | 0     | 0     | 0     | 0     |
| Beads in the bottle             | 0     | 0     | 0     | 0     | 6.38  | 0     |
| Choice reaction time            | 0     | 0     | 0     | 0     | 0     | 0.46  |
| Continuous performance          | 1.64  | 0     | 0     | 0.53  | 4.2   | 0     |
| Delay discounting               | 0     | 0     | 3.02  | 0     | 2.83  | 0     |
| Delayed match-to-sample         | 5.77  | 24.05 | 8.26  | 0.27  | 0.53  | 0     |
| Finger tapping                  | 0     | 0     | 0     | 0     | 0     | 0     |
| Flanker                         | 0     | 0     | 0     | 0     | 0     | 12.31 |
| Go/no-go                        | 21.96 | 10.47 | 4.84  | 10.07 | 7.84  | 8.33  |
| Hayling sentence completion     | 0     | 0     | 0     | 0     | 0     | 0     |
| Match stimuli                   | 0     | 0     | 0     | 0     | 0     | 0     |
| Mental arithmetic               | 0     | 0     | 0     | 0     | 0     | 0.2   |
| Modified Iowa gambling task     | 0     | 0     | 0     | 0.07  | 0.05  | 0     |
| Multi-source interference       | 0     | 0     | 0     | 11.96 | 0     | 0.21  |
| N-back                          | 19.86 | 14.6  | 17.06 | 7.69  | 26.05 | 32.59 |
| Probabilistic reversal learning | 0     | 0     | 0.03  | 0     | 0     | 0     |

|                            |       |       |       |       |       |       |
|----------------------------|-------|-------|-------|-------|-------|-------|
| Reading                    | 0     | 0     | 0.07  | 0     | 0     | 0     |
| Recall                     | 0.01  | 6.79  | 3.78  | 0     | 0.13  | 0.84  |
| Recognition                | 15.54 | 8.77  | 14.82 | 18.7  | 19.39 | 13.69 |
| Semantic decision making   | 0     | 0     | 0     | 0.04  | 0     | 1.37  |
| Serial reaction time       | 4.27  | 0.08  | 3.34  | 0     | 0     | 0     |
| Set shifting               | 2.98  | 0.3   | 0     | 2.53  | 0     | 0     |
| Simon task                 | 0     | 0     | 0     | 0     | 0     | 0     |
| Smooth pursuit             | 0     | 0     | 0     | 0     | 0     | 0     |
| Source memory              | 0     | 5.68  | 2.91  | 0     | 0     | 0     |
| Spatial working memory     | 0     | 17.75 | 6.99  | 8.99  | 0     | 0     |
| Sternberg working memory   | 4.81  | 0     | 4.53  | 2.44  | 0     | 0     |
| Stop signal task           | 2.78  | 0     | 3.33  | 5.62  | 7.76  | 0     |
| Stroop                     | 8.04  | 5.14  | 11.94 | 11.64 | 11.94 | 0     |
| Switch task                | 8.3   | 0     | 0.2   | 0     | 6.22  | 1.1   |
| Tower of London            | 0     | 4.3   | 0.42  | 0.06  | 0     | 0     |
| Transitive inference       | 0     | 0     | 0     | 0     | 0     | 0     |
| Two-choice prediction task | 0     | 0     | 0     | 0     | 0     | 0     |
| Verbal fluency             | 4.04  | 2.07  | 10.06 | 12.64 | 0     | 28.8  |
| Virtual Morris water task  | 0     | 0     | 0     | 0     | 0     | 0     |
| Wisconsin card sorting     | 0     | 0     | 4.39  | 6.76  | 6.67  | 0.11  |

---

Supplementary Table 11. Peak coordinates of clusters derived from Activation Likelihood Estimation (ALE) meta-analysis of transdiagnostic pooled patient hyper- and hypoactivation (i.e., aberrant activation) during functional neuroimaging of cognitive control tasks separately for studies of children and adults.

| Region                                                                               | Cluster Size (voxels) | Peak Intensity (Z) | MNI Coordinates |     |     |
|--------------------------------------------------------------------------------------|-----------------------|--------------------|-----------------|-----|-----|
|                                                                                      |                       |                    | X               | Y   | Z   |
| <b>Adult Studies</b>                                                                 |                       |                    |                 |     |     |
| anterior mid-cingulate /pre-supplementary motor area                                 | 403                   | 4.46               | 4               | 22  | 32  |
| right insula (extending to ventrolateral prefrontal cortex)                          | 599                   | 4.85               | 44              | 28  | -12 |
| right intraparietal sulcus                                                           | 272                   | 4.42               | 38              | -56 | 48  |
| left prefrontal cortex extending from mid-dorsolateral prefrontal to premotor cortex | 1028                  | 4.63               | -48             | 22  | 26  |
| <b>Child Studies</b>                                                                 |                       |                    |                 |     |     |
| right ventrolateral prefrontal cortex                                                | 180                   | 4.49               | 32              | 30  | -10 |

Supplementary Table 12. Peak coordinates of clusters derived from Activation Likelihood Estimation (ALE) meta-analysis of transdiagnostic patient hyper- and hypoactivation during functional neuroimaging of cognitive control tasks separately for medicated and unmedicated patients.

| Contrast/ Region                                            | Cluster Size (voxels) | Peak Intensity (Z) | MNI Coordinates |     |     |
|-------------------------------------------------------------|-----------------------|--------------------|-----------------|-----|-----|
|                                                             |                       |                    | X               | Y   | Z   |
| <b>Control &gt; Patient No Medication</b>                   |                       |                    |                 |     |     |
| dorsal anterior cingulate                                   | 380                   | 4.98               | -2              | 38  | 14  |
| right insula (extending to ventrolateral prefrontal cortex) | 586                   | 6.08               | 42              | 28  | -12 |
| left insula (extending to ventrolateral prefrontal cortex)  | 307                   | 4.37               | -32             | 20  | -10 |
| right intraparietal sulcus                                  | 336                   | 4.98               | 38              | -56 | 48  |
| left prefrontal cortex                                      | 608                   | 4.17               | -48             | 24  | 26  |
| <b>Control &gt; Patient Medication</b>                      |                       |                    |                 |     |     |
| dorsal anterior cingulate                                   | 213                   | 4.14               | -4              | 38  | 12  |
| right insula (extending to ventrolateral prefrontal cortex) | 593                   | 6.0                | 42              | 28  | -12 |
| left prefrontal cortex                                      | 232                   | 3.57               | -44             | 18  | 36  |
| left intraparietal sulcus                                   | 212                   | 5.6                | -48             | -42 | 46  |
| <b>Patient &gt; Control Medication</b>                      |                       |                    |                 |     |     |
| anterior mid-cingulate cortex/pre-supplementary motor area  | 286                   | 3.94               | 0               | 10  | 48  |

Unmedicated patient experiments did not show any convergent whole-brain significant hyperactivations.

Supplementary Table 13. Peak coordinates of clusters derived from Activation Likelihood Estimation (ALE) meta-analysis of transdiagnostic patient hyper- and hypoactivation during functional neuroimaging of cognitive control tasks separately for patients samples who performed no differently or worse than control groups.

| Contrast/ Region                                            | Cluster Size (voxels) | Peak Intensity (Z) | MNI Coordinates |    |     |
|-------------------------------------------------------------|-----------------------|--------------------|-----------------|----|-----|
|                                                             |                       |                    | X               | Y  | Z   |
| <b>Control &gt; Patient</b>                                 |                       |                    |                 |    |     |
| No performance difference                                   |                       |                    |                 |    |     |
| dorsal anterior cingulate                                   | 653                   | 4.96               | -4              | 38 | 12  |
| right insula (extending to ventrolateral prefrontal cortex) | 231                   | 5.30               | 36              | 28 | -10 |
| left prefrontal cortex                                      | 661                   | 4.62               | -48             | 24 | 24  |
| <b>Control &gt; Patient</b>                                 |                       |                    |                 |    |     |
| Worse Performance                                           |                       |                    |                 |    |     |
| anterior mid-cingulate cortex/pre-supplementary motor area  | 228                   | 3.83               | 6               | 30 | 50  |
| right insula (extending to ventrolateral prefrontal cortex) | 342                   | 5.39               | 44              | 28 | -12 |
| left prefrontal cortex                                      | 261                   | 4.10               | -42             | 30 | 30  |
| <b>Patient &gt; Control</b>                                 |                       |                    |                 |    |     |
| No performance difference                                   |                       |                    |                 |    |     |
| ventromedial prefrontal cortex                              | 224                   | 4.74               | -2              | 40 | -8  |
| <b>Patient &gt; Control Medication</b>                      |                       |                    |                 |    |     |
| Worse Performance                                           |                       |                    |                 |    |     |
| anterior mid-cingulate cortex/pre-supplementary motor area  | 247                   | 3.78               | 0               | 10 | 52  |

Supplementary Table 14. Peak coordinates of clusters derived from Activation Likelihood Estimation (ALE) meta-analysis of pooled activation during functional neuroimaging of cognitive control tasks separately for psychotic and non-psychotic samples.

| Contrast/ Region                                              | Cluster Size (voxels) | Peak Intensity (Z) | MNI Coordinates |     |     |
|---------------------------------------------------------------|-----------------------|--------------------|-----------------|-----|-----|
|                                                               |                       |                    | X               | Y   | Z   |
| Psychotic Pooled Activation                                   |                       |                    |                 |     |     |
| left prefrontal cortex                                        | 836                   | 4.90               | -48             | 22  | 26  |
| anterior mid-cingulate cortex/pre-supplementary motor area    | 364                   | 4.32               | 4               | 24  | 32  |
| Non-Psychotic Pooled Activation                               |                       |                    |                 |     |     |
| right insula (extending to ventrolateral prefrontal cortex)   | 355                   | 4.75               | 34              | 32  | -12 |
| right intraparietal sulcus                                    | 415                   | 4.90               | 26              | -58 | 54  |
| Psychotic Pooled Activation > Non-Psychotic Pooled Activation |                       |                    |                 |     |     |
| left insula                                                   | 29                    | 2.79               | -36             | 12  | 12  |
| left anterior middle frontal gyrus                            | 123                   | 2.92               | -40             | 46  | 24  |
| left posterior middle frontal gyrus                           | 312                   | 3.18               | -50             | 8   | 46  |
| anterior mid-cingulate cortex                                 | 75                    | 2.55               | 4               | 28  | 32  |
| mid-cingulate cortex/pre-supplementary motor area             | 20                    | 2.25               | -8              | 12  | 40  |
| Non-Psychotic Pooled Activation > Psychotic Pooled Activation |                       |                    |                 |     |     |
| right insula (extending to ventrolateral prefrontal cortex)   | 136                   | 2.69               | 32              | 36  | -14 |
| right intraparietal sulcus                                    | 114                   | 3.11               | 30              | -58 | 58  |

Supplementary Table 15. Percent contribution to clusters of convergence for whole-brain non-psychotic and psychotic pooled aberrant activation contrasts by experiment sample and design characteristics.

| Experiment sample/<br>design characteristics | Cluster of convergence                                                |                                                         |                           |                                           |
|----------------------------------------------|-----------------------------------------------------------------------|---------------------------------------------------------|---------------------------|-------------------------------------------|
|                                              | Right<br>anterior<br>insula/<br>ventrolateral<br>prefrontal<br>cortex | Right<br>intraparietal<br>sulcus/<br>parietal<br>cortex | Left<br>frontal<br>cortex | Anterior<br>mid-<br>cingulate/<br>pre-SMA |
| <b>Contrast Direction</b>                    |                                                                       |                                                         |                           |                                           |
| Control > Patient                            | 69.72                                                                 | 49.17                                                   | 68.16                     | 58.49                                     |
| Patient > Control                            | 30.28                                                                 | 50.83                                                   | 31.84                     | 41.51                                     |
| <b>Disorder Class</b>                        |                                                                       |                                                         |                           |                                           |
| Non-psychotic                                | 100                                                                   | 100                                                     | 0                         | 0                                         |
| Psychotic                                    | 0                                                                     | 0                                                       | 100                       | 100                                       |
| <b>Diagnosis</b>                             |                                                                       |                                                         |                           |                                           |
| Schizophrenia                                | 0                                                                     | 0                                                       | 100                       | 100                                       |
| Substance Use                                | 30.6                                                                  | 43.46                                                   | 0                         | 0                                         |
| Anxiety                                      | 34.27                                                                 | 10                                                      | 0                         | 0                                         |
| Bipolar Disorder                             | 26.68                                                                 | 24.36                                                   | 0                         | 0                                         |
| Major Depression                             | 8.45                                                                  | 22.18                                                   | 0                         | 0                                         |
| <b>Domain</b>                                |                                                                       |                                                         |                           |                                           |
| Working Memory                               | 15.27                                                                 | 35.83                                                   | 39                        | 40.28                                     |
| Recognition                                  | 8.91                                                                  | 3.33                                                    | 21.02                     | 9.03                                      |
| Response Inhibition                          | 23.25                                                                 | 21.35                                                   | 0                         | 0.32                                      |
| Set Shifting                                 | 23.54                                                                 | 5.27                                                    | 6.99                      | 6.11                                      |
| Conflict Monitoring                          | 10.8                                                                  | 17.57                                                   | 6.34                      | 11.85                                     |
| Response Selection                           | 10.17                                                                 | 12.31                                                   | 9.51                      | 8.98                                      |
| Performance Monitoring                       | 7.74                                                                  | 4.33                                                    | 0                         | 6.33                                      |
| Verbal Fluency                               | 0.31                                                                  | 0                                                       | 7.98                      | 9.53                                      |
| Other                                        | 0                                                                     | 0                                                       | 9.16                      | 7.56                                      |
| <b>Age Group</b>                             |                                                                       |                                                         |                           |                                           |
| Child/adolescent                             | 29.93                                                                 | 17.64                                                   | 0.66                      | 0.57                                      |
| Adult                                        | 70.07                                                                 | 72.47                                                   | 99.34                     | 99.43                                     |
| Older adult                                  | 0                                                                     | 9.9                                                     | 0                         | 0                                         |
| <b>Current Psychotropic Medication</b>       |                                                                       |                                                         |                           |                                           |
| Yes                                          | 54.58                                                                 | 36.46                                                   | 81.96                     | 84.46                                     |
| No                                           | 22.18                                                                 | 42.92                                                   | 15.77                     | 9.04                                      |
| Not reported                                 | 23.23                                                                 | 20.62                                                   | 2.27                      | 6.5                                       |
| <b>Behavioral Performance</b>                |                                                                       |                                                         |                           |                                           |
| Worse than Control Group                     | 27.35                                                                 | 21.18                                                   | 59.44                     | 38.92                                     |
| Equivalent to Control Group                  | 72.65                                                                 | 78.82                                                   | 40.56                     | 61.05                                     |
| Not reported                                 | 0                                                                     | 0                                                       | 0                         | 0.02                                      |
| <b>Imaging Modality</b>                      |                                                                       |                                                         |                           |                                           |
| Functional MRI                               | 94.51                                                                 | 95.74                                                   | 74.61                     | 91.07                                     |



|                                    |       |       |       |       |
|------------------------------------|-------|-------|-------|-------|
| PET                                | 5.39  | 4.26  | 24.85 | 7.59  |
| ASL                                | 0     | 0     | 0.54  | 1.35  |
| SPECT                              | 0.1   | 0     | 0     | 0     |
| Tasks                              |       |       |       |       |
| Antisaccade                        | 0     | 0     | 0     | 0     |
| Beads in the bottle                | 0     | 0     | 0     | 2.4   |
| Choice reaction time               | 0     | 0     | 5.93  | 5.23  |
| Continuous performance             | 7.74  | 4.33  | 0     | 6.33  |
| Delay discounting                  | 0     | 0     | 3.04  | 0     |
| Delayed match-to-sample            | 4.88  | 14.19 | 8.92  | 0.72  |
| Finger tapping                     | 0     | 0     | 0.88  | 0     |
| Flanker                            | 0     | 0     | 0     | 0     |
| Go/no-go                           | 20.46 | 14.74 | 0     | 0.32  |
| Hayling sentence completion        | 0.31  | 0     | 0     | 0     |
| Match stimuli                      | 0     | 0     | 0     | 0     |
| Mental arithmetic                  | 0     | 0     | 0     | 6.27  |
| Modified Iowa gambling task        | 9.97  | 12.25 | 0     | 0     |
| Multi-source interference          | 2.71  | 9.12  | 0     | 0.65  |
| N-back                             | 9.82  | 13.89 | 20.9  | 32.64 |
| Probabilistic reversal<br>learning | 0     | 0     | 0     | 0     |
| Reading                            | 0     | 0     | 0.86  | 2.63  |
| Recall                             | 0     | 0     | 3.75  | 4.8   |
| Recognition                        | 8.91  | 3.33  | 18.75 | 9.03  |
| Semantic decision making           | 0     | 0     | 3.68  | 0.41  |
| Serial reaction time               | 0     | 0     | 0     | 0.13  |
| Set shifting                       | 8.75  | 0     | 0     | 0     |
| Simon task                         | 0     | 0     | 0     | 0     |
| Smooth pursuit                     | 0     | 0     | 0     | 0     |
| Source memory                      | 0     | 0     | 2.27  | 0     |
| Spatial working memory             | 0     | 0     | 0     | 0     |
| Sternberg working memory           | 0.57  | 7.75  | 9.18  | 0     |
| Stop signal task                   | 2.79  | 6.62  | 0     | 0     |
| Stroop                             | 8.09  | 8.45  | 6.34  | 11.44 |
| Switch task                        | 14.68 | 5.27  | 0     | 0     |
| Tower of London                    | 0.2   | 0.06  | 0.54  | 1.35  |
| Transitive inference               | 0     | 0     | 0     | 0     |
| Two-choice prediction task         | 0     | 0     | 0     | 0     |
| Verbal fluency                     | 0     | 0     | 7.98  | 9.53  |
| Virtual Morris water task          | 0     | 0     | 0     | 0     |
| Wisconsin card sorting             | 0.1   | 0     | 6.99  | 6.11  |

---

Supplementary Table 16. Peak coordinates of clusters derived from Activation Likelihood Estimation (ALE) meta-analysis of patient hypoactivation during functional neuroimaging of cognitive control tasks separately for psychotic and non-psychotic samples.

| Contrast/ Region                                                                                                                      | Cluster Size (voxels) | Peak Intensity (Z) | MNI Coordinates |    |     |
|---------------------------------------------------------------------------------------------------------------------------------------|-----------------------|--------------------|-----------------|----|-----|
|                                                                                                                                       |                       |                    | X               | Y  | Z   |
| Psychotic Control > Patient right insula (extending to ventrolateral prefrontal cortex)                                               | 309                   | 5.20               | 44              | 28 | -12 |
| left prefrontal cortex                                                                                                                | 686                   | 4.42               | -48             | 24 | 26  |
| Non-psychotic Patient > Control right insula (extending to ventrolateral prefrontal cortex)                                           | 363                   | 4.87               | 38              | 30 | -12 |
| Conjunction Non-psychotic Control > Patient & Psychotic Control > Patient right insula (extending to ventrolateral prefrontal cortex) | 56                    | 4.23               | 40              | 28 | -12 |
| Psychotic Control > Patient > Non-Psychotic Control > Patient anterior middle frontal gyrus                                           | 57                    | 3.0                | -40             | 42 | 26  |
| posterior middle frontal gyrus                                                                                                        | 353                   | 3.22               | -38             | 10 | 14  |
| Non-psychotic Control > Patient > Psychotic Control > Patient right ventrolateral prefrontal cortex                                   | 56                    | 2.46               | 34              | 34 | -16 |

Patient hyperactivation experiments did not show any convergent whole-brain significant hyperactivations separately for psychotic and non-psychotic disorder samples.

Supplementary Table 17. Percent contribution to clusters of convergence for whole-brain non-psychotic and psychotic patient hypo- and hyper-activation activation contrasts by experiment sample and design characteristics.

| Experiment sample/<br>design characteristics | Cluster of convergence                                                |                                                                       |                           |
|----------------------------------------------|-----------------------------------------------------------------------|-----------------------------------------------------------------------|---------------------------|
|                                              | Right<br>anterior<br>insula/<br>ventrolateral<br>prefrontal<br>cortex | Right<br>anterior<br>insula/<br>ventrolateral<br>prefrontal<br>cortex | Left<br>frontal<br>cortex |
| <b>Contrast Direction</b>                    |                                                                       |                                                                       |                           |
| Control > Patient                            | 100                                                                   | 100                                                                   | 100                       |
| Patient > Control                            | 0                                                                     | 0                                                                     | 0                         |
| <b>Disorder Class</b>                        |                                                                       |                                                                       |                           |
| Non-psychotic                                | 100                                                                   | 0                                                                     | 0                         |
| Psychotic                                    | 0                                                                     | 100                                                                   | 100                       |
| <b>Diagnosis</b>                             |                                                                       |                                                                       |                           |
| Schizophrenia                                | 0                                                                     | 100                                                                   | 100                       |
| Substance Use                                | 11.61                                                                 | 0                                                                     | 0                         |
| Anxiety                                      | 43.74                                                                 | 0                                                                     | 0                         |
| Bipolar Disorder                             | 32.76                                                                 | 0                                                                     | 0                         |
| Major Depression                             | 11.89                                                                 | 0                                                                     | 0                         |
| <b>Domain</b>                                |                                                                       |                                                                       |                           |
| Working Memory                               | 10.49                                                                 | 49.34                                                                 | 40.12                     |
| Recognition                                  | 9.84                                                                  | 23.66                                                                 | 20.38                     |
| Response Inhibition                          | 39.95                                                                 | 6.03                                                                  | 0                         |
| Set Shifting                                 | 25.33                                                                 | 0                                                                     | 7.79                      |
| Conflict Monitoring                          | 12.19                                                                 | 0.41                                                                  | 8.85                      |
| Response Selection                           | 0                                                                     | 0                                                                     | 5.46                      |
| Performance Monitoring                       | 2.19                                                                  | 1.3                                                                   | 0                         |
| Verbal Fluency                               | 0                                                                     | 8.31                                                                  | 10.93                     |
| Other                                        | 0                                                                     | 10.95                                                                 | 6.48                      |
| <b>Age Group</b>                             |                                                                       |                                                                       |                           |
| Child/adolescent                             | 28.42                                                                 | 0                                                                     | 0.3                       |
| Adult                                        | 71.58                                                                 | 100                                                                   | 99.7                      |
| Older adult                                  | 0                                                                     | 0                                                                     | 0                         |
| <b>Current Psychotropic Medication</b>       |                                                                       |                                                                       |                           |
| Yes                                          | 76.3                                                                  | 97.92                                                                 | 73.87                     |
| No                                           | 9.9                                                                   | 0.16                                                                  | 21.7                      |
| Not reported                                 | 13.8                                                                  | 1.92                                                                  | 4.43                      |
| <b>Behavioral Performance</b>                |                                                                       |                                                                       |                           |
| Worse than Control Group                     | 35.11                                                                 | 59.78                                                                 | 53.71                     |
| Equivalent to Control Group                  | 64.89                                                                 | 40.22                                                                 | 46.29                     |
| Not reported                                 | 0                                                                     | 0                                                                     | 0                         |
| <b>Imaging Modality</b>                      |                                                                       |                                                                       |                           |

|                                    |       |       |       |
|------------------------------------|-------|-------|-------|
| Functional MRI                     | 97.81 | 90.63 | 74.38 |
| PET                                | 2.19  | 9.37  | 24.36 |
| ASL                                | 0     | 0     | 1.26  |
| SPECT                              | 0     | 0     | 0     |
| Tasks                              |       |       |       |
| Antisaccade                        | 0     | 0     | 0     |
| Beads in the bottle                | 0     | 0     | 0     |
| Choice reaction time               | 0     | 0     | 0     |
| Continuous performance             | 2.19  | 1.3   | 0     |
| Delay discounting                  | 0     | 0     | 4.19  |
| Delayed match-to-sample            | 3.42  | 11.05 | 11.7  |
| Finger tapping                     | 0     | 0     | 0     |
| Flanker                            | 0     | 0     | 0     |
| Go/no-go                           | 36.99 | 6.03  | 0     |
| Hayling sentence completion        | 0     | 0     | 0     |
| Match stimuli                      | 0     | 0     | 0     |
| Mental arithmetic                  | 0     | 0     | 0     |
| Modified Iowa gambling task        | 0     | 0     | 0     |
| Multi-source interference          | 0     | 0     | 0     |
| N-back                             | 1.68  | 38.3  | 21.59 |
| Probabilistic reversal<br>learning | 0     | 0     | 0     |
| Reading                            | 0     | 0     | 2.37  |
| Recall                             | 0     | 0.01  | 4.11  |
| Recognition                        | 9.85  | 23.66 | 16    |
| Semantic decision making           | 0     | 0     | 0     |
| Serial reaction time               | 0     | 10.94 | 0     |
| Set shifting                       | 7.99  | 0     | 0     |
| Simon task                         | 0     | 0     | 0     |
| Smooth pursuit                     | 0     | 0     | 0     |
| Source memory                      | 0     | 0     | 4.38  |
| Spatial working memory             | 0     | 0     | 0     |
| Sternberg working memory           | 5.38  | 0     | 6.82  |
| Stop signal task                   | 2.96  | 0     | 0     |
| Stroop                             | 12.19 | 0.41  | 8.85  |
| Switch task                        | 17.34 | 0     | 0     |
| Tower of London                    | 0     | 0     | 1.26  |
| Transitive inference               | 0     | 0     | 0     |
| Two-choice prediction task         | 0     | 0     | 0     |
| Verbal fluency                     | 0     | 8.31  | 10.93 |
| Virtual Morris water task          | 0     | 0     | 0     |
| Wisconsin card sorting             | 0     | 0     | 7.79  |

---

No significant clusters were observed in the contrasts of patient > control for either psychotic or non-psychotic disorder experiments.

Supplementary Table 18. Peak coordinates of clusters derived from Activation Likelihood Estimation (ALE) meta-analysis of patient hyper- and hypoactivation during functional neuroimaging of cognitive control tasks separately by disorder classes

| Contrast/ Region                                            | Cluster Size (voxels) | Peak Intensity (Z) | MNI Coordinates |     |     |
|-------------------------------------------------------------|-----------------------|--------------------|-----------------|-----|-----|
|                                                             |                       |                    | X               | Y   | Z   |
| Control > Schizophrenia Patient                             |                       |                    |                 |     |     |
| right insula (extending to ventrolateral prefrontal cortex) | 309                   | 5.20               | 44              | 28  | -12 |
| left prefrontal cortex                                      | 686                   | 4.42               | -48             | 24  | 26  |
| Control > Substance Use Disorder Patient                    |                       |                    |                 |     |     |
| right insula (extending to ventrolateral prefrontal cortex) | 177                   | 4.26               | 30              | -70 | 48  |

Patient hyperactivation experiments did not show any convergent whole-brain significant hyperactivations separately for disorder classes. Anxiety, unipolar and bipolar depressive disorder classes showed no convergent whole-brain significant hypoactivations.

Supplementary Table 19. Peak coordinates of clusters derived from Activation Likelihood Estimation (ALE) meta-analysis of patient hyper- and hypoactivation during functional neuroimaging of cognitive control tasks separately by domain

| Contrast/ Region                                                                                   | Cluster Size (voxels) | Peak Intensity (Z) | MNI Coordinates |     |     |
|----------------------------------------------------------------------------------------------------|-----------------------|--------------------|-----------------|-----|-----|
|                                                                                                    |                       |                    | X               | Y   | Z   |
| Control > Patient: Inhibition<br>right insula (extending to<br>ventrolateral prefrontal<br>cortex) | 500                   | 4.9                | 52              | 30  | -10 |
| Control > Patient: Working<br>Memory                                                               |                       |                    |                 |     |     |
| right cerebellum                                                                                   | 250                   | 4.0                | 4               | -46 | -20 |
| right insula (extending to<br>ventrolateral prefrontal<br>cortex)                                  | 252                   | 4.52               | -34             | 20  | -10 |
| Patient > Control: Working<br>Memory                                                               |                       |                    |                 |     |     |
| ventromedial prefrontal cortex                                                                     | 287                   | 4.89               | -2              | 40  | -8  |

Patient hyperactivation experiments did not show any convergent whole-brain significant hyperactivations separately for disorder classes. Anxiety, unipolar and bipolar depressive disorder classes showed no convergent whole-brain significant hypoactivations.

Supplementary Table 20. Peak coordinates of clusters derived from Activation Likelihood Estimation (ALE) meta-analysis of patient hyper- and hypoactivation during functional neuroimaging of cognitive control tasks separately by domain and disorder class

| Contrast/ Region                                            | Cluster Size (voxels) | Peak Intensity (Z) | MNI Coordinates |    |     |
|-------------------------------------------------------------|-----------------------|--------------------|-----------------|----|-----|
|                                                             |                       |                    | X               | Y  | Z   |
| Control > Schizophrenia Patient:                            |                       |                    |                 |    |     |
| Working Memory                                              |                       |                    |                 |    |     |
| right insula (extending to ventrolateral prefrontal cortex) | 217                   | 4.15               | 34              | 26 | -12 |
